# Supplementary material for: Performance Comparison of Different Constructed Wetlands Designs for the Removal of Personal Care Products
Source: MDPI journal article supplement (doi:10.3390/ijerph17093091), 2020-04-29
Supplement: s1 [file s1]

## Supplementary Materials

### Performance Comparison of Different Constructed Wetlands Designs for the Removal of Personal Care Products

Huma Ilyas <sup>1,2,\*</sup> and Eric D. van Hullebusch <sup>1</sup>

<sup>1</sup> Université de Paris, Institut de physique du globe de Paris, CNRS, F-75005 Paris, France;

[vanhullebusch@ipgp.fr](mailto:vanhullebusch@ipgp.fr)

<sup>2</sup> Water Treatment and Management Consultancy, B.V., 2289 ED Rijswijk, The Netherlands

\* Correspondence: [hi.wtmconsult@gmail.com](mailto:hi.wtmconsult@gmail.com)

**Supplementary materials 1: The treatment performance of four types of CWs (FWSCW, HFCW, VFCW, and HCW) for the removal of personal care products.**

**Table S1.** The performance of FWSCW for personal care products removal.

| Wetland type/Scale /type of treatment | W T | PCPs                     | Depth (m)/ Area (m <sup>2</sup> PE <sup>-1</sup> ) | T (°C) /pH | HLR (m <sup>3</sup> m <sup>-2</sup> d <sup>-1</sup> )/ OM | OLR (g COD m <sup>-2</sup> d <sup>-1</sup> ) | HRT (days) /SA/ED (months) | Filter media (mm)/Plants                                 | Effluent DO (mg L <sup>-1</sup> )/ ORP (Inf/Eff) (mV) | Influent/ Effluent conc. (µg L <sup>-1</sup> ) | Removal rate (mg m <sup>-2</sup> d <sup>-1</sup> )/ Removal (%) | Author/ Country                 |
|---------------------------------------|-----|--------------------------|----------------------------------------------------|------------|-----------------------------------------------------------|----------------------------------------------|----------------------------|----------------------------------------------------------|-------------------------------------------------------|------------------------------------------------|-----------------------------------------------------------------|---------------------------------|
| Full/ Tertiary                        | *   | Galaxolide               | 3.5/0.1                                            | 17/8.1     | 0.01/NA                                                   | 0.2                                          | 30/36/2                    | NA/ <i>Phragmites australis</i> , <i>Typha latifolia</i> | 8.4/NA                                                | 2.9/0.4                                        | 0.02/85                                                         | Matamoros et al. [1] /Spain     |
|                                       | *   | Tonalide                 | 3.5/0.1                                            | 17/8.1     | 0.01/NA                                                   | 0.2                                          | 30/36/2                    | As above                                                 | 8.4/NA                                                | 0.9/0.1                                        | 0.01/88                                                         |                                 |
| Full/ Tertiary                        | *   | Galaxolide               | 3.5/0.1                                            | 7.8/7.3    | 0.01/NA                                                   | 0.2                                          | 30/36/2                    | NA/ <i>Phragmites australis</i> , <i>Typha latifolia</i> | 8.9/NA                                                | 2.9/0.3                                        | 0.03/88                                                         | Matamoros et al. [1] /Spain     |
|                                       | *   | Tonalide                 | 3.5/0.1                                            | 7.8/7.3    | 0.01/NA                                                   | 0.2                                          | 30/36/2                    | As above                                                 | 8.9/NA                                                | 0.9/0.1                                        | 0.01/90                                                         |                                 |
| Full/ Tertiary                        | *   | Galaxolide               | 3.5/0.1                                            | NA/NA      | 0.01/NA                                                   | 0.7                                          | 30/36/2                    | NA/ <i>Phragmites australis</i> , <i>Typha latifolia</i> | NA/NA                                                 | 2.9/0.4                                        | 0.02/87                                                         | Llorens et al. [2]/Spain        |
|                                       | *   | Tonalide                 | 3.5/0.1                                            | NA/NA      | 0.01/NA                                                   | 0.7                                          | 30/36/2                    | As above                                                 | NA/NA                                                 | 0.9/0.1                                        | 0.01/89                                                         |                                 |
| Lab/ Secondary                        | D   | Methyl dihydro-jasmonate | 0.5/18                                             | 18/6.9     | 0.05/CF                                                   | 5.0                                          | 2.1/17/3                   | Soilless system/ <i>Typha angustifolia</i>               | 0.6 (0.5/0.7)/ +26(+36/-62)                           | 4.0/0.7                                        | 0.2/82                                                          | Hijosa-Valsero et al. [3]/Spain |
|                                       | D   | Galaxolide               | 0.5/18                                             | 18/6.9     | 0.05/CF                                                   | 5.0                                          | 2.1/17/3                   | As above                                                 | As above                                              | 1.2/0.3                                        | 0.05/78                                                         |                                 |
|                                       | D   | Tonalide                 | 0.5/18                                             | 18/6.9     | 0.05/CF                                                   | 5.0                                          | 2.1/17/3                   | As above                                                 | As above                                              | 0.4/0.1                                        | 0.01/75                                                         |                                 |
| Lab/ Secondary                        | D   | Methyl dihydro-jasmonate | 0.5/18                                             | 17/7.1     | 0.05/CF                                                   | 5.0                                          | 3.3/17/3                   | 25 cm Siliceous gravel (4.0)/ <i>Typha angustifolia</i>  | 0.5 (0.6/0.3)/ +26/(+63/-101)                         | 4.0/0.8                                        | 0.2/80                                                          | Hijosa-Valsero et al. [3]/Spain |
|                                       | D   | Galaxolide               | 0.5/18                                             | 17/7.1     | 0.05/CF                                                   | 5.0                                          | 3.3/17/3                   | As above                                                 | As above                                              | 1.2/0.5                                        | 0.03/58                                                         |                                 |
|                                       | D   | Tonalide                 | 0.5/18                                             | 17/7.1     | 0.05/CF                                                   | 5.0                                          | 3.3/17/3                   | As above                                                 | As above                                              | 0.4/0.2                                        | 0.01/50                                                         |                                 |

| Wetland type/Scale /type of treatment | W T | PCPs                     | Depth (m)/ Area (m <sup>2</sup> PE <sup>-1</sup> ) | T (°C) /pH | HLR (m <sup>3</sup> m <sup>-2</sup> d <sup>-1</sup> )/ OM | OLR (g COD m <sup>-2</sup> d <sup>-1</sup> ) | HRT (days) /SA/ED (months) | Filter media (mm)/Plants                                | Effluent DO (mg L <sup>-1</sup> )/ ORP (Inf/Eff) (mV) | Influent/ Effluent conc. (µg L <sup>-1</sup> ) | Removal rate (mg m <sup>-2</sup> d <sup>-1</sup> )/ Removal (%) | Author/ Country                  |
|---------------------------------------|-----|--------------------------|----------------------------------------------------|------------|-----------------------------------------------------------|----------------------------------------------|----------------------------|---------------------------------------------------------|-------------------------------------------------------|------------------------------------------------|-----------------------------------------------------------------|----------------------------------|
| Lab/ Secondary                        | D   | Methyl dihydro-jasmonate | 0.5/18                                             | 19/6.6     | 0.05/CF                                                   | 5.0                                          | 2.9/17/3                   | Soilless system/ <i>Phragmites australis</i>            | 0.7 (0.8/0.5)/ +26/(+48/-25)                          | 4.0/0.2                                        | 0.2/96                                                          | Hijosa-Valsero et al. [3]/Spain  |
|                                       | D   | Galaxolide               | 0.5/18                                             | 19/6.6     | 0.05/CF                                                   | 5.0                                          | 2.9/17/3                   | As above                                                | As above                                              | 1.2/0.3                                        | 0.05/78                                                         |                                  |
|                                       | D   | Tonalide                 | 0.5/18                                             | 19/6.6     | 0.05/CF                                                   | 5.0                                          | 2.9/17/3                   | As above                                                | As above                                              | 0.4/0.1                                        | 0.01/75                                                         |                                  |
| Lab/ Secondary                        | D   | Methyl dihydro-jasmonate | 0.5/6.0                                            | 6.9/6.7    | 0.05/CF                                                   | 25                                           | 2.1/11/3                   | Soilless system/ <i>Typha angustifolia</i>              | 0.6 (0.7/0.4)/ -6/(+22/-25)                           | 12/6.0                                         | 0.3/50                                                          | Hijosa-Valsero et al. [3]/Spain  |
|                                       | D   | Galaxolide               | 0.5/6.0                                            | 6.9/6.7    | 0.05/CF                                                   | 25                                           | 2.1/11/3                   | As above                                                | As above                                              | 0.9/0.5                                        | 0.02/40                                                         |                                  |
|                                       | D   | Tonalide                 | 0.5/6.0                                            | 6.9/6.7    | 0.05/CF                                                   | 25                                           | 2.1/11/3                   | As above                                                | As above                                              | 0.4/0.3                                        | 0.005/25                                                        |                                  |
| Lab/ Secondary                        | D   | Methyl dihydro-jasmonate | 0.5/6.0                                            | 5.6/6.8    | 0.05/CF                                                   | 25                                           | 3.3/11/3                   | 25 cm Siliceous gravel (4.0)/ <i>Typha angustifolia</i> | 0.6 (0.6/0.6)/ -6/(-10/-3)                            | 12/6.0                                         | 0.3/50                                                          | Hijosa-Valsero et al. [3]/Spain  |
|                                       | D   | Galaxolide               | 0.5/6.0                                            | 5.6/6.8    | 0.05/CF                                                   | 25                                           | 3.3/11/3                   | As above                                                | As above                                              | 0.9/0.7                                        | 0.01/22                                                         |                                  |
|                                       | D   | Tonalide                 | 0.5/6.0                                            | 5.6/6.8    | 0.05/CF                                                   | 25                                           | 3.3/11/3                   | As above                                                | As above                                              | 0.4/0.3                                        | 0.004/20                                                        |                                  |
| Lab/ Secondary                        | D   | Methyl dihydro-jasmonate | 0.5/6.0                                            | 6.4/7.0    | 0.05/CF                                                   | 25                                           | 2.9/11/3                   | Soilless system/ <i>Phragmites australis</i>            | 0.6 (0.6/0.5)/ -6/(-10/-50)                           | 12/7.2                                         | 0.2/40                                                          | Hijosa-Valsero et al. [3]/Spain  |
|                                       | D   | Galaxolide               | 0.5/6.0                                            | 6.4/7.0    | 0.05/CF                                                   | 25                                           | 2.9/11/3                   | As above                                                | As above                                              | 0.9/0.8                                        | 0.003/7.0                                                       |                                  |
|                                       | D   | Tonalide                 | 0.5/6.0                                            | 6.4/7.0    | 0.05/CF                                                   | 25                                           | 2.9/11/3                   | As above                                                | As above                                              | 0.4/0.38                                       | 0.001/4.0                                                       |                                  |
| Lab/ Secondary                        | D   | Methyl dihydro-jasmonate | 0.5/18                                             | 18/6.9     | 0.05/CF                                                   | 6.0                                          | 0.5/36/9                   | Soilless system/ <i>Typha angustifolia</i>              | 0.9 (1.0/0.8)/ +2.7/(+65/+14)                         | 5.8/0.7                                        | 0.3/88                                                          | Reyes-Contreras et al. [4]/Spain |
|                                       | D   | Galaxolide               | 0.5/18                                             | 18/6.9     | 0.05/CF                                                   | 6.0                                          | 0.5/36/9                   | As above                                                | As above                                              | 2.1/0.3                                        | 0.09/87                                                         |                                  |
|                                       | D   | Tonalide                 | 0.5/18                                             | 18/6.9     | 0.05/CF                                                   | 6.0                                          | 0.5/36/9                   | As above                                                | As above                                              | 0.4/0.1                                        | 0.02/76                                                         |                                  |

| Wetland type/Scale /type of treatment | W T | PCPs                     | Depth (m)/ Area (m <sup>2</sup> PE <sup>-1</sup> ) | T (°C) /pH | HLR (m <sup>3</sup> m <sup>-2</sup> d <sup>-1</sup> )/ OM | OLR (g COD m <sup>-2</sup> d <sup>-1</sup> ) | HRT (days) /SA/ED (months) | Filter media (mm)/Plants                                | Effluent DO (mg L <sup>-1</sup> )/ ORP (Inf/Eff) (mV) | Influent/ Effluent conc. (µg L <sup>-1</sup> ) | Removal rate (mg m <sup>-2</sup> d <sup>-1</sup> )/ Removal (%) | Author/ Country                  |
|---------------------------------------|-----|--------------------------|----------------------------------------------------|------------|-----------------------------------------------------------|----------------------------------------------|----------------------------|---------------------------------------------------------|-------------------------------------------------------|------------------------------------------------|-----------------------------------------------------------------|----------------------------------|
| Lab/ Secondary                        | D   | Methyl dihydro-jasmonate | 0.5/8.4                                            | 6.9/6.7    | 0.05/CF                                                   | 17                                           | 0.5/30/6                   | Soilless system/ <i>Typha angustifolia</i>              | 0.4/-41/ (-47/-25)                                    | 6.6/3.2                                        | 0.2/51                                                          | Reyes-Contreras et al. [4]/Spain |
|                                       | D   | Galaxolide               | 0.5/8.4                                            | 6.9/6.7    | 0.05/CF                                                   | 17                                           | 0.5/30/6                   | As above                                                | As above                                              | 1.5/0.8                                        | 0.03/44                                                         |                                  |
|                                       | D   | Tonalide                 | 0.5/8.4                                            | 6.9/6.7    | 0.05/CF                                                   | 17                                           | 0.5/30/6                   | As above                                                | As above                                              | 0.3/0.2                                        | 0.01/38                                                         |                                  |
| Lab/ Secondary                        | D   | Methyl dihydro-jasmonate | 0.5/18                                             | 17/7.1     | 0.05/CF                                                   | 6.0                                          | 0.4/36/9                   | 25 cm Siliceous gravel (4.0)/ <i>Typha angustifolia</i> | 1.0 (1.5/0.6)/ +2.7/(+93/-65)                         | 5.8/0.8                                        | 0.3/87                                                          | Reyes-Contreras et al. [4]/Spain |
|                                       | D   | Galaxolide               | 0.5/18                                             | 17/7.1     | 0.05/CF                                                   | 6.0                                          | 0.4/36/9                   | As above                                                | As above                                              | 2.1/0.6                                        | 0.08/73                                                         |                                  |
|                                       | D   | Tonalide                 | 0.5/18                                             | 17/7.1     | 0.05/CF                                                   | 6.0                                          | 0.4/36/9                   | As above                                                | As above                                              | 0.4/0.1                                        | 0.01/68                                                         |                                  |
| Lab/ Secondary                        | D   | Methyl dihydro-jasmonate | 0.5/8.4                                            | 5.6/6.8    | 0.05/CF                                                   | 17                                           | 0.4/30/6                   | 25 cm Siliceous gravel (4.0)/ <i>Typha angustifolia</i> | 0.6 (0.6/0.6)/ -41/(-22/-81)                          | 6.6/3.3                                        | 0.2/50                                                          | Reyes-Contreras et al. [4]/Spain |
|                                       | D   | Galaxolide               | 0.5/8.4                                            | 5.6/6.8    | 0.05/CF                                                   | 17                                           | 0.4/30/6                   | As above                                                | As above                                              | 1.5/0.9                                        | 0.03/40                                                         |                                  |
|                                       | D   | Tonalide                 | 0.5/8.4                                            | 5.6/6.8    | 0.05/CF                                                   | 17                                           | 0.4/30/6                   | As above                                                | As above                                              | 0.3/0.2                                        | 0.01/40                                                         |                                  |
| Lab/ Secondary                        | D   | Methyl dihydro-jasmonate | 0.5/18                                             | 19/6.6     | 0.05/CF                                                   | 6.0                                          | 1.1/36/9                   | Soilless system/ <i>Phragmites australis</i>            | 0.9 (1.2/0.7)/ +2.7/(+54/-14)                         | 5.8/0.3                                        | 0.3/94                                                          | Reyes-Contreras et al. [4]/Spain |
|                                       | D   | Galaxolide               | 0.5/18                                             | 19/6.6     | 0.05/CF                                                   | 6.0                                          | 1.1/36/9                   | As above                                                | As above                                              | 2.1/0.4                                        | 0.08/81                                                         |                                  |
|                                       | D   | Tonalide                 | 0.5/18                                             | 19/6.6     | 0.05/CF                                                   | 6.0                                          | 1.1/36/9                   | As above                                                | As above                                              | 0.4/0.1                                        | 0.02/73                                                         |                                  |
| Lab/ Secondary                        | D   | Methyl dihydro-jasmonate | 0.5/8.4                                            | 6.4/7.0    | 0.05/CF                                                   | 17                                           | 1.1/30/6                   | Soilless system/ <i>Phragmites australis</i>            | 0.5/-41/ (-54/-50)                                    | 6.6/3.4                                        | 0.2/49                                                          | Reyes-Contreras et al. [4]/Spain |
|                                       | D   | Galaxolide               | 0.5/8.4                                            | 6.4/7.0    | 0.05/CF                                                   | 17                                           | 1.1/30/6                   | As above                                                | As above                                              | 1.5/1.1                                        | 0.02/24                                                         |                                  |
|                                       | D   | Tonalide                 | 0.5/8.4                                            | 6.4/7.0    | 0.05/CF                                                   | 17                                           | 1.1/30/6                   | As above                                                | As above                                              | 0.3/0.2                                        | 0.004/26                                                        |                                  |
| Lab/ Secondary                        | D   | Methyl dihydro-jasmonate | 0.5/20                                             | 18/7.0     | 0.05/CF                                                   | 6.0                                          | 1.6/36/3                   | Soilless system/                                        | 0.2/ (-100/-126)                                      | 7.3/1.5                                        | 0.3/79                                                          | Hijosa-Valsero et al. [5]/Spain  |

| Wetland type/Scale /type of treatment | W T | PCPs                       | Depth (m)/ Area (m <sup>2</sup> PE <sup>-1</sup> ) | T (°C) /pH | HLR (m <sup>3</sup> m <sup>-2</sup> d <sup>-1</sup> )/ OM | OLR (g COD m <sup>-2</sup> d <sup>-1</sup> ) | HRT (days) /SA/ED (months) | Filter media (mm)/Plants                                | Effluent DO (mg L <sup>-1</sup> )/ ORP (Inf/Eff) (mV) | Influent/ Effluent conc. (µg L <sup>-1</sup> ) | Removal rate (mg m <sup>-2</sup> d <sup>-1</sup> )/ Removal (%) | Author/ Country                 |
|---------------------------------------|-----|----------------------------|----------------------------------------------------|------------|-----------------------------------------------------------|----------------------------------------------|----------------------------|---------------------------------------------------------|-------------------------------------------------------|------------------------------------------------|-----------------------------------------------------------------|---------------------------------|
|                                       |     |                            |                                                    |            |                                                           |                                              |                            | <i>Typha angustifolia</i>                               |                                                       |                                                |                                                                 |                                 |
|                                       | D   | Galaxolide                 | 0.5/20                                             | 18/7.0     | 0.05/CF                                                   | 6.0                                          | 1.6/36/3                   | As above                                                | As above                                              | 3.8/0.4                                        | 0.2/89                                                          |                                 |
|                                       | D   | Tonalide                   | 0.5/20                                             | 18/7.0     | 0.05/CF                                                   | 6.0                                          | 1.6/36/3                   | As above                                                | As above                                              | 0.3/0.1                                        | 0.01/76                                                         |                                 |
| Lab/ Secondary                        | D   | Methyl dihydro-jasmonate   | 0.5/20                                             | 19/6.8     | 0.05/CF                                                   | 6.0                                          | 1.2/36/3                   | 25 cm Siliceous gravel (4.0)/ <i>Typha angustifolia</i> | 0.2/ (-100/-201)                                      | 7.3/1.5                                        | 0.3/79                                                          | Hijosa-Valsero et al. [5]/Spain |
|                                       | D   | Galaxolide                 | 0.5/20                                             | 19/6.8     | 0.05/CF                                                   | 6.0                                          | 1.2/36/3                   | As above                                                | As above                                              | 3.8/1.3                                        | 0.1/66                                                          |                                 |
|                                       | D   | Tonalide                   | 0.5/20                                             | 19/6.8     | 0.05/CF                                                   | 6.0                                          | 1.2/36/3                   | As above                                                | As above                                              | 0.3/0.1                                        | 0.01/68                                                         |                                 |
| Lab/ Secondary                        | D   | Methyl dihydro-jasmonate   | 0.5/20                                             | 20/6.8     | 0.05/CF                                                   | 6.0                                          | 1.6/36/3                   | Soilless system/ <i>Phragmites australis</i>            | 0.2/ (-100/-107)                                      | 7.3/0.7                                        | 0.3/90                                                          | Hijosa-Valsero et al. [5]/Spain |
|                                       | D   | Galaxolide                 | 0.5/20                                             | 20/6.8     | 0.05/CF                                                   | 6.0                                          | 1.6/36/3                   | As above                                                | As above                                              | 3.8/0.8                                        | 0.1/80                                                          |                                 |
|                                       | D   | Tonalide                   | 0.5/20                                             | 20/6.8     | 0.05/CF                                                   | 6.0                                          | 1.6/36/3                   | As above                                                | As above                                              | 0.3/0.04                                       | 0.01/84                                                         |                                 |
| Lab/ Primary                          | S   | Triclosan                  | 0.5/7.0                                            | NA/NA      | 0.3/NA                                                    | 17                                           | 5/NA/NA                    | 25 cm Sand (0-3)/ <i>Cattail</i>                        | NA/NA                                                 | 60/1.0                                         | 17/98                                                           | Liu et al. [6]/China            |
| Lab/ Primary                          | S   | Triclosan                  | 0.5/7.0                                            | NA/NA      | 0.3/NA                                                    | 17                                           | 5/NA/NA                    | As above/ <i>Hornwort</i>                               | NA/NA                                                 | 60/1.3                                         | 17/98                                                           | Liu et al. [6]/China            |
| Lab/ Primary                          | S   | Triclosan                  | 0.5/7.0                                            | NA/NA      | 0.3/NA                                                    | 17                                           | 5/NA/NA                    | As above/ <i>Lemna minor</i>                            | NA/NA                                                 | 60/0.8                                         | 17/99                                                           | Liu et al. [6]/China            |
| Lab/ Primary                          | S   | N,N-diethyl-meta-toluamide | 0.7/27                                             | NA/7.4     | 0.02/CF                                                   | 5.0                                          | 7/NA/4                     | NA/ <i>Spirodela polyrhiza</i>                          | 6.0/NA/-63                                            | 25/25                                          | 0.0/0.0                                                         | Li et al. [7]/UK                |
|                                       | S   | Triclosan                  | 0.7/27                                             | NA/7.4     | 0.02/CF                                                   | 5.0                                          | 7/NA/4                     | As above                                                | As above                                              | 25/1.5                                         | 0.4/94                                                          |                                 |
| Pilot/ Secondary                      | D   | Methylparaben              | 1.0/1.3                                            | NA/NA      | 0.1/CF                                                    | 73                                           | 21/NA/NA                   | NA/ <i>Landoltia punctata</i>                           | NA/NA                                                 | 157/15                                         | 17/91                                                           | Anjos et al. [8]/Brazil         |
|                                       | D   | Propylparaben              | 1.0/1.3                                            | NA/NA      | 0.1/CF                                                    | 73                                           | 21/NA/NA                   | As above                                                | NA/NA                                                 | 149/57                                         | 11/61                                                           |                                 |
| Pilot/ Secondary                      | D   | Methylparaben              | 1.0/1.3                                            | NA/NA      | 0.1/CF                                                    | 73                                           | 21/NA/NA                   | NA/ <i>Lemna minor</i>                                  | NA/NA                                                 | 157/18                                         | 17/89                                                           | Anjos et al. [8]/Brazil         |

| Wetland type/Scale /type of treatment | W T | PCPs                       | Depth (m)/ Area (m <sup>2</sup> PE <sup>-1</sup> ) | T (°C) /pH | HLR (m <sup>3</sup> m <sup>-2</sup> d <sup>-1</sup> )/ OM | OLR (g COD m <sup>-2</sup> d <sup>-1</sup> ) | HRT (days) /SA/ED (months) | Filter media (mm)/Plants       | Effluent DO (mg L <sup>-1</sup> )/ ORP (Inf/Eff) (mV) | Influent/ Effluent conc. (µg L <sup>-1</sup> ) | Removal rate (mg m <sup>-2</sup> d <sup>-1</sup> )/ Removal (%) | Author/ Country  |
|---------------------------------------|-----|----------------------------|----------------------------------------------------|------------|-----------------------------------------------------------|----------------------------------------------|----------------------------|--------------------------------|-------------------------------------------------------|------------------------------------------------|-----------------------------------------------------------------|------------------|
|                                       | D   | Propylparaben              | 1.0/1.3                                            | NA/NA      | 0.1/CF                                                    | 73                                           | 21/NA/NA                   | As above                       | NA/NA                                                 | 149/16                                         | 16/89                                                           |                  |
| <b>Aerated FWSCW</b>                  |     |                            |                                                    |            |                                                           |                                              |                            |                                |                                                       |                                                |                                                                 |                  |
| Lab/ Primary                          | S   | N,N-diethyl-meta-toluamide | 0.7/27                                             | NA/8.0     | 0.02/CF                                                   | 5.0                                          | 7/NA/4                     | NA/ <i>Spirodela polyrhiza</i> | NA/NA/+14                                             | 25/17                                          | 0.0/4.2                                                         | Li et al. [7]/UK |
|                                       | S   | Triclosan                  | 0.7/27                                             | NA/8.0     | 0.02/CF                                                   | 5.0                                          | 7/NA/4                     | As above                       | As above                                              | 25/0.3                                         | 0.4/99                                                          |                  |

Note: Free water surface flow constructed wetland (FWSCW); Wastewater type (WT); Domestic (D); Synthetic (S); Personal care products (PCPs); Temperature (T); Hydraulic loading rate (HLR); Operational mode (OM); Intermittently fed (IF); Continuously fed (CF); Organic loading rate (OLR); Chemical oxygen demand (COD); Hydraulic retention time (HRT); System age (SA); Experiment duration (ED); Dissolved oxygen (DO); Oxidation-reduction potential (ORP); Not available (NA).

Domestic (55%) and Industrial discharge (45%) (\*); The Population equivalent (PE) is calculated based on the common relation 1 PE = 60 g BOD d<sup>-1</sup>. BOD values were approximated using the ratio COD/BOD = 2 in the studies where BOD was not reported [6-8], and COD values were approximated using the ratio COD = 2BOD in the studies where COD was not reported [5].

**Table S2.** The performance of HFCW for personal care products removal.

| Wetland type/Scale/ type of treatment | W T | PCPs                     | Depth (m)/ Area (m <sup>2</sup> PE <sup>-1</sup> ) | T (°C) /pH | HLR (m <sup>3</sup> m <sup>-2</sup> d <sup>-1</sup> )/ OM | OLR (g COD m <sup>-2</sup> d <sup>-1</sup> ) | HRT (days) /SA/ED (months) | Filter media (mm)/Plants                                  | Effluent DO (mg L <sup>-1</sup> )/ ORP (Inf/Eff) (mV) | Influent/ Effluent conc. (µg L <sup>-1</sup> ) | Removal rate (mg m <sup>-2</sup> d <sup>-1</sup> )/ Removal (%) | Author/ Country                  |
|---------------------------------------|-----|--------------------------|----------------------------------------------------|------------|-----------------------------------------------------------|----------------------------------------------|----------------------------|-----------------------------------------------------------|-------------------------------------------------------|------------------------------------------------|-----------------------------------------------------------------|----------------------------------|
| Lab/ Secondary                        | D   | Methyl dihydro-jasmonate | 0.5/18                                             | 18/6.5     | 0.05/CF                                                   | 5.0                                          | 2.5/17/3                   | 45 cm Siliceous gravel (4.0)/ <i>Phragmites australis</i> | 0.5/+26/ (+26/+22)                                    | 4.0/0.1                                        | 0.2/98                                                          | Hijosa-Valsero et al. [3]/Spain  |
|                                       | D   | Galaxolide               | 0.5/18                                             | 18/6.5     | 0.05/CF                                                   | 5.0                                          | 2.5/17/3                   | As above                                                  | As above                                              | 1.2/0.5                                        | 0.04/62                                                         |                                  |
|                                       | D   | Tonalide                 | 0.5/18                                             | 18/6.5     | 0.05/CF                                                   | 5.0                                          | 2.5/17/3                   | As above                                                  | As above                                              | 0.4/0.2                                        | 0.01/62                                                         |                                  |
| Lab/ Secondary                        | D   | Methyl dihydro-jasmonate | 0.5/18                                             | 19/7.4     | 0.05/CF                                                   | 5.0                                          | 2.6/17/3                   | 45 cm Siliceous gravel (4.0) /Unplanted                   | 0.3/+26/ (-6/-91)                                     | 4.0/0.6                                        | 0.2/85                                                          | Hijosa-Valsero et al. [3]/Spain  |
|                                       | D   | Galaxolide               | 0.5/18                                             | 19/7.4     | 0.05/CF                                                   | 5.0                                          | 2.6/17/3                   | As above                                                  | As above                                              | 1.2/0.8                                        | 0.02/30                                                         |                                  |
|                                       | D   | Tonalide                 | 0.5/18                                             | 19/7.4     | 0.05/CF                                                   | 5.0                                          | 2.6/17/3                   | As above                                                  | As above                                              | 0.4/0.3                                        | 0.007/37                                                        |                                  |
| Lab/ Secondary                        | D   | Methyl dihydro-jasmonate | 0.5/6.0                                            | 5.6/6.9    | 0.05/CF                                                   | 25                                           | 2.5/11/3                   | 45 cm Siliceous gravel (4.0)/ <i>Phragmites australis</i> | 0.5/-6/ (+39/+24)                                     | 12/3.0                                         | 0.4/75                                                          | Hijosa-Valsero et al. [3]/Spain  |
|                                       | D   | Galaxolide               | 0.5/6.0                                            | 5.6/6.9    | 0.05/CF                                                   | 25                                           | 2.5/11/3                   | As above                                                  | As above                                              | 0.9/0.8                                        | 0.004/10                                                        |                                  |
|                                       | D   | Tonalide                 | 0.5/6.0                                            | 5.6/6.9    | 0.05/CF                                                   | 25                                           | 2.5/11/3                   | As above                                                  | As above                                              | 0.4/0.3                                        | 0.004/20                                                        |                                  |
| Lab/ Secondary                        | D   | Methyl dihydro-jasmonate | 0.5/6.0                                            | 5.4/7.4    | 0.05/CF                                                   | 25                                           | 2.6/11/3                   | 45 cm Siliceous gravel (4.0) /Unplanted                   | 0.6/-6/ (+46/+11)                                     | 12/6.0                                         | 0.3/50                                                          | Hijosa-Valsero et al. [3]/Spain  |
| Lab/ Secondary                        | D   | Methyl dihydro-jasmonate | 0.5/18                                             | 18/6.5     | 0.05/CF                                                   | 6.0                                          | 2.2/36/9                   | 45 cm Siliceous gravel (4.0)/ <i>Phragmites australis</i> | 0.6 (0.6/0.5)/ +2.7/(+47/-3.3)                        | 5.8/0.7                                        | 0.3/89                                                          | Reyes-Contreras et al. [4]/Spain |
|                                       | D   | Galaxolide               | 0.5/18                                             | 18/6.5     | 0.05/CF                                                   | 6.0                                          | 2.2/36/9                   | As above                                                  | As above                                              | 2.1/0.6                                        | 0.07/70                                                         |                                  |
|                                       | D   | Tonalide                 | 0.5/18                                             | 18/6.5     | 0.05/CF                                                   | 6.0                                          | 2.2/36/9                   | As above                                                  | As above                                              | 0.4/0.1                                        | 0.01/68                                                         |                                  |

| Wetland type/Scale/<br>type of treatment | W<br>T | PCPs                            | Depth<br>(m)/<br>Area<br>(m <sup>2</sup><br>PE <sup>-1</sup> ) | T<br>(°C)<br>/pH | HLR<br>(m <sup>3</sup> m <sup>-2</sup><br>d <sup>-1</sup> )/<br>OM | OLR<br>(g<br>COD<br>m <sup>-2</sup> d <sup>-1</sup> ) | HRT<br>(days)<br>/SA/ED<br>(months) | Filter media<br>(mm)/Plants                                            | Effluent<br>DO<br>(mg L <sup>-1</sup> )/<br>ORP<br>(Inf/Eff)<br>(mV) | Influent/<br>Effluent<br>conc.<br>(µg L <sup>-1</sup> ) | Removal<br>rate<br>(mg m <sup>-2</sup><br>d <sup>-1</sup> )/<br>Removal<br>(%) | Author/<br>Country                          |
|------------------------------------------|--------|---------------------------------|----------------------------------------------------------------|------------------|--------------------------------------------------------------------|-------------------------------------------------------|-------------------------------------|------------------------------------------------------------------------|----------------------------------------------------------------------|---------------------------------------------------------|--------------------------------------------------------------------------------|---------------------------------------------|
| Lab/<br>Secondary                        | D      | Methyl<br>dihydro-<br>jasmonate | 0.5/8.4                                                        | 5.6/6.9          | 0.05/CF                                                            | 17                                                    | 2.2/30/6                            | 45 cm<br>Siliceous<br>gravel (4.0)/<br><i>Phragmites<br/>australis</i> | 0.6<br>(0.8/0.5)/<br>-41/(+14/<br>-55)                               | 6.6/4.7                                                 | 0.1/29                                                                         | Reyes-<br>Contreras et<br>al. [4]/Spain     |
| Lab/<br>Secondary                        | D      | Galaxolide                      | 0.5/8.4                                                        | 5.6/6.9          | 0.05/CF                                                            | 17                                                    | 2.2/30/6                            | As above                                                               | As above                                                             | 1.5/1.3                                                 | 0.01/12                                                                        | Reyes-<br>Contreras et<br>al. [4]/Spain     |
|                                          | D      | Tonalide                        | 0.5/8.4                                                        | 5.6/6.9          | 0.05/CF                                                            | 17                                                    | 2.2/30/6                            | As above                                                               | As above                                                             | 0.3/0.4                                                 | NR                                                                             |                                             |
|                                          | D      | Methyl<br>dihydro-<br>jasmonate | 0.5/18                                                         | 17/7.4           | 0.05/CF                                                            | 6.0                                                   | 0.7/36/9                            | 45 cm<br>Siliceous<br>gravel (4.0)/<br>Unplanted                       | 0.5<br>(0.5/0.4)/<br>+2.7/(-5.7<br>/-83)                             | 5.8/1.4                                                 | 0.2/76                                                                         |                                             |
|                                          | D      | Galaxolide                      | 0.5/18                                                         | 17/7.4           | 0.05/CF                                                            | 6.0                                                   | 0.7/36/9                            | As above                                                               | As above                                                             | 2.1/1.7                                                 | 0.02/19                                                                        |                                             |
| Lab/<br>Secondary                        | D      | Tonalide                        | 0.5/18                                                         | 17/7.4           | 0.05/CF                                                            | 6.0                                                   | 0.7/36/9                            | As above                                                               | As above                                                             | 0.4/0.36                                                | 0.004/16                                                                       | Reyes-<br>Contreras et<br>al. [4]/Spain     |
|                                          | D      | Methyl<br>dihydro-<br>jasmonate | 0.5/8.4                                                        | 5.4/7.4          | 0.05/CF                                                            | 17                                                    | 0.7/30/6                            | 45 cm<br>Siliceous<br>gravel (4.0)/<br>Unplanted                       | 0.7                                                                  | 6.6/6.0                                                 | 0.03/8.5                                                                       |                                             |
|                                          | D      | Galaxolide                      | 0.5/8.4                                                        | 5.4/7.4          | 0.05/CF                                                            | 17                                                    | 0.7/30/6                            | As above                                                               | (0.8/0.5)/                                                           | 1.5/1.7                                                 | NR                                                                             |                                             |
|                                          | D      | Tonalide                        | 0.5/8.4                                                        | 5.4/7.4          | 0.05/CF                                                            | 17                                                    | 0.7/30/6                            | As above                                                               | -41/(+8/                                                             | 0.3/0.5                                                 | NR                                                                             |                                             |
| Pilot/<br>Secondary                      | D      | Galaxolide                      | 0.5/8.4                                                        | NA/7.6           | 0.03/IF                                                            | 14                                                    | 5.5/NA/6                            | Gravel<br>(8-32)/<br><i>Phragmites<br/>australis</i>                   | 0.3/-91/+8                                                           | 2.1/1.8                                                 | 0.01/14                                                                        | Carranza-<br>Diaz et al.<br>[9]/<br>Germany |
|                                          | D      | Tonalide                        | 0.5/8.4                                                        | NA/7.6           | 0.03/IF                                                            | 14                                                    | 5.5/NA/6                            | As above                                                               | As above                                                             | 0.9/0.7                                                 | 0.01/20                                                                        |                                             |
|                                          | D      | Triclosan                       | 0.5/8.4                                                        | NA/7.6           | 0.03/IF                                                            | 14                                                    | 5.5/NA/6                            | As above                                                               | As above                                                             | 1.0/0.9                                                 | 0.003/8.0                                                                      |                                             |
|                                          | D      | Galaxolide                      | 0.5/8.4                                                        | NA/7.7           | 0.03/IF                                                            | 14                                                    | 5.5/NA/6                            | As above/<br>Unplanted                                                 | 0.8/-91/<br>-84                                                      | 2.1/2.0                                                 | 0.004/5.0                                                                      |                                             |
| Pilot/<br>Secondary                      | D      | Tonalide                        | 0.5/8.4                                                        | NA/7.7           | 0.03/IF                                                            | 14                                                    | 5.5/NA/6                            | As above                                                               | As above                                                             | 0.9/0.8                                                 | 0.003/9.0                                                                      | Carranza-<br>Diaz et al.<br>[9]/<br>Germany |
|                                          | D      | Triclosan                       | 0.5/8.4                                                        | NA/7.7           | 0.03/IF                                                            | 14                                                    | 5.5/NA/6                            | As above                                                               | As above                                                             | 1.0/0.95                                                | 0.001/2.0                                                                      |                                             |



| Wetland type/Scale/ type of treatment | W T | PCPs       | Depth (m)/ Area (m <sup>2</sup> PE <sup>-1</sup> ) | T (°C) /pH | HLR (m <sup>3</sup> m <sup>-2</sup> d <sup>-1</sup> )/ OM | OLR (g COD m <sup>-2</sup> d <sup>-1</sup> ) | HRT (days) /SA/ED (months) | Filter media (mm)/Plants                                                                                                                 | Effluent DO (mg L <sup>-1</sup> )/ ORP (Inf/Eff) (mV) | Influent/ Effluent conc. (µg L <sup>-1</sup> ) | Removal rate (mg m <sup>-2</sup> d <sup>-1</sup> )/ Removal (%) | Author/ Country                      |
|---------------------------------------|-----|------------|----------------------------------------------------|------------|-----------------------------------------------------------|----------------------------------------------|----------------------------|------------------------------------------------------------------------------------------------------------------------------------------|-------------------------------------------------------|------------------------------------------------|-----------------------------------------------------------------|--------------------------------------|
| Lab/ Primary                          | S   | Triclosan  | 0.5/6.7                                            | NA/NA      | 0.3/IF                                                    | 18                                           | 5/5/1                      | 25 cm (0-3)/ <i>Typha angustifolia</i>                                                                                                   | NA/NA                                                 | 60/5.1                                         | 16/91                                                           | Zhao et al. [10]/China               |
| Lab/ Primary                          | S   | Triclosan  | 0.5/6.7                                            | NA/NA      | 0.3/IF                                                    | 18                                           | 5/5/1                      | 25 cm (0-3)/ <i>Salvinia natans</i>                                                                                                      | NA/NA                                                 | 60/8.0                                         | 15/87                                                           | Zhao et al. [10]/China               |
| Lab/ Primary                          | S   | Triclosan  | 0.5/6.7                                            | NA/NA      | 0.3/IF                                                    | 18                                           | 5/5/1                      | 25 cm (0-3)/ <i>Hydrilla. verticillata</i>                                                                                               | NA/NA                                                 | 60/11                                          | 14/81                                                           | Zhao et al. [10]/China               |
| Full/ Secondary                       | D   | Triclosan  | 0.8/5.0                                            | NA/NA      | 0.03                                                      | 13                                           | 6.5/120/6                  | 80 cm Gravel (4-8)/ <i>Phragmites australis</i>                                                                                          | NA/NA                                                 | 0.1/0.01                                       | 0.003/91                                                        | Chen et al. [11]/Czech Republic      |
| Full/ Secondary                       | D   | Triclosan  | 0.8/9.4                                            | NA/NA      | 0.02                                                      | 3.4                                          | 13/36/6                    | 80 cm Gravel (4-8)/ <i>Phalaris arundinacea</i>                                                                                          | NA/NA                                                 | 0.1/0.01                                       | 0.003/91                                                        | Chen et al. [11]/Czech Republic      |
| Full/ Secondary                       | D   | Triclosan  | 0.8/6.6                                            | NA/NA      | 0.04                                                      | 7.3                                          | 5.4/144/6                  | 80 cm Gravel (4-16)/ <i>Phragmites australis</i>                                                                                         | NA/NA                                                 | 0.1/0.01                                       | 0.003/91                                                        | Chen et al. [11]/Czech Republic      |
| Pilot/ Secondary                      | D   | Galaxolide | 0.47/2.0                                           | 25/7.4     | 0.1/CF                                                    | 61                                           | NA/NA/ 7                   | 3.9 cm Gravel (5) 1.9 cm Tezontle (5) 3.8 cm Tezontle (5)/ <i>Typha latifolia</i> , <i>Phragmites australis</i> , <i>Cyperus papyrus</i> | 1.4/NA/ -325                                          | 4.1/0.9                                        | 0.3/79                                                          | Herrera-Cárdenas et al. [12]/ México |

| Wetland type/Scale/<br>type of treatment | W<br>T | PCPs                                  | Depth<br>(m)/<br>Area<br>(m <sup>2</sup><br>PE <sup>-1</sup> ) | T<br>(°C)<br>/pH | HLR<br>(m <sup>3</sup> m <sup>-2</sup><br>d <sup>-1</sup> )/<br>OM | OLR<br>(g<br>COD<br>m <sup>-2</sup> d <sup>-1</sup> ) | HRT<br>(days)<br>/SA/ED<br>(months) | Filter media<br>(mm)/Plants                                                    | Effluent<br>DO<br>(mg L <sup>-1</sup> )/<br>ORP<br>(Inf/Eff)<br>(mV) | Influent/<br>Effluent<br>conc.<br>(µg L <sup>-1</sup> ) | Removal<br>rate<br>(mg m <sup>-2</sup><br>d <sup>-1</sup> )/<br>Removal<br>(%) | Author/<br>Country                     |
|------------------------------------------|--------|---------------------------------------|----------------------------------------------------------------|------------------|--------------------------------------------------------------------|-------------------------------------------------------|-------------------------------------|--------------------------------------------------------------------------------|----------------------------------------------------------------------|---------------------------------------------------------|--------------------------------------------------------------------------------|----------------------------------------|
|                                          | D      | Tonalide                              | 0.47/2.0                                                       | 25/7.4           | 0.1/CF                                                             | 61                                                    | NA/NA/<br>7                         | As above                                                                       | As above                                                             | 0.5/0.1                                                 | 0.05/86                                                                        |                                        |
|                                          | D      | Methyl<br>dihydro-<br>jasmonate       | 0.47/2.0                                                       | 25/7.4           | 0.1/CF                                                             | 61                                                    | NA/NA/<br>7                         | As above                                                                       | As above                                                             | 11/3.4                                                  | 0.8/70                                                                         |                                        |
| Lab/<br>Secondary                        | D      | Methyl<br>dihydro-<br>jasmonate       | 0.5/20                                                         | 20/6.5           | 0.05/CF                                                            | 6.0                                                   | 3/36/3                              | 45 cm<br>Siliceous<br>gravel (4.0)/<br><i>Phragmites<br/>australis</i>         | 0.2/<br>(-100/<br>-102)                                              | 7.3/1.1                                                 | 0.3/85                                                                         | Hijosa-<br>Valsero et<br>al. [5]/Spain |
|                                          | D      | Galaxolide                            | 0.5/20                                                         | 20/6.5           | 0.05/CF                                                            | 6.0                                                   | 3/36/3                              | As above                                                                       | As above                                                             | 3.8/1.1                                                 | 0.1/72                                                                         |                                        |
|                                          | D      | Tonalide                              | 0.5/20                                                         | 20/6.5           | 0.05/CF                                                            | 6.0                                                   | 3/36/3                              | As above                                                                       | As above                                                             | 0.3/0.1                                                 | 0.01/72                                                                        |                                        |
| Lab/<br>Secondary                        | D      | Methyl<br>dihydro-<br>jasmonate       | 0.5/20                                                         | 19/7.2           | 0.05/CF                                                            | 6.0                                                   | 1.7/36/3                            | 45 cm<br>Siliceous<br>gravel (4.0)/<br>Unplanted                               | 0.2/<br>(-100/<br>-155)                                              | 7.3/1.2                                                 | 0.3/83                                                                         | Hijosa-<br>Valsero et<br>al. [5]/Spain |
|                                          | D      | Galaxolide                            | 0.5/20                                                         | 19/7.2           | 0.05/CF                                                            | 6.0                                                   | 1.7/36/3                            | As above                                                                       | As above                                                             | 3.8/2.2                                                 | 0.08/42                                                                        |                                        |
|                                          | D      | Tonalide                              | 0.5/20                                                         | 19/7.2           | 0.05/CF                                                            | 6.0                                                   | 1.7/36/3                            | As above                                                                       | As above                                                             | 0.3/0.2                                                 | 0.004/36                                                                       |                                        |
| Full/<br>Tertiary                        | *      | Galaxolide                            | 0.7/8.6                                                        | 18/NA            | 0.003/IF                                                           | 14                                                    | NA/120/1                            | Gravel (8-25)<br>Granitic<br>gravel (6-25)/<br><i>Phragmites<br/>australis</i> | 0.4/NA                                                               | 1.4/0.8                                                 | 0.001/42                                                                       | Matamoros<br>et al. [13]/<br>Spain     |
|                                          | *      | Oxybenzone                            | 0.7/8.6                                                        | 18/NA            | 0.003/IF                                                           | 14                                                    | NA/120/1                            | As above                                                                       | 0.4/NA                                                               | 1.1/0.3                                                 | 0.002/74                                                                       |                                        |
|                                          | *      | Methylparaben                         | 0.7/8.6                                                        | 18/NA            | 0.003/IF                                                           | 14                                                    | NA/120/1                            | As above                                                                       | 0.4/NA                                                               | 0.7/0.6                                                 | 0.0003/16                                                                      |                                        |
|                                          | *      | Triclosan                             | 0.7/8.6                                                        | 18/NA            | 0.003/IF                                                           | 14                                                    | NA/120/1                            | As above                                                                       | 0.4/NA                                                               | 0.7/0.2                                                 | 0.001/67                                                                       |                                        |
|                                          | *      | Tributyl<br>phosphate                 | 0.7/8.6                                                        | 18/NA            | 0.003/IF                                                           | 14                                                    | NA/120/1                            | As above                                                                       | 0.4/NA                                                               | 0.5/0.2                                                 | 0.001/61                                                                       |                                        |
|                                          | *      | Tonalide                              | 0.7/8.6                                                        | 18/NA            | 0.003/IF                                                           | 14                                                    | NA/120/1                            | As above                                                                       | 0.4/NA                                                               | 0.5/0.3                                                 | 0.001/41                                                                       |                                        |
|                                          | *      | Tris (2-<br>chloroethyl)<br>phosphate | 0.7/8.6                                                        | 18/NA            | 0.003/IF                                                           | 14                                                    | NA/120/1                            | As above                                                                       | 0.4/NA                                                               | 0.5/0.4                                                 | 0.0004/28                                                                      |                                        |

| Wetland type/Scale/ type of treatment | W T | PCPs                           | Depth (m)/ Area (m <sup>2</sup> PE <sup>-1</sup> ) | T (°C) /pH | HLR (m <sup>3</sup> m <sup>-2</sup> d <sup>-1</sup> )/ OM | OLR (g COD m <sup>-2</sup> d <sup>-1</sup> ) | HRT (days) /SA/ED (months) | Filter media (mm)/Plants                   | Effluent DO (mg L <sup>-1</sup> )/ ORP (Inf/Eff) (mV) | Influent/ Effluent conc. (µg L <sup>-1</sup> ) | Removal rate (mg m <sup>-2</sup> d <sup>-1</sup> )/ Removal (%) | Author/ Country              |
|---------------------------------------|-----|--------------------------------|----------------------------------------------------|------------|-----------------------------------------------------------|----------------------------------------------|----------------------------|--------------------------------------------|-------------------------------------------------------|------------------------------------------------|-----------------------------------------------------------------|------------------------------|
| Full/ Tertiary                        | *   | Methyl dihydro-jasmonate       | 0.7/8.6                                            | 18/NA      | 0.003/IF                                                  | 14                                           | NA/120/1                   | As above                                   | 0.4/NA                                                | 0.3/0.1                                        | 0.0004/56                                                       | Matamoros et al. [13]/ Spain |
|                                       | *   | Triphenyl phosphate            | 0.7/8.6                                            | 18/NA      | 0.003/IF                                                  | 14                                           | NA/120/1                   | As above                                   | 0.4/NA                                                | 0.1/0.01                                       | 0.0002/82                                                       |                              |
|                                       | *   | Galaxolide                     | 0.7/3.2                                            | 23/NA      | 0.003/IF                                                  | 38                                           | NA/120/1                   | As above                                   | 0.5/NA                                                | 1.4/0.6                                        | 0.002/59                                                        |                              |
|                                       | *   | Oxybenzone                     | 0.7/3.2                                            | 23/NA      | 0.003/IF                                                  | 38                                           | NA/120/1                   | As above                                   | 0.5/NA                                                | 1.1/0.2                                        | 0.002/85                                                        |                              |
|                                       | *   | Methylparaben                  | 0.7/3.2                                            | 23/NA      | 0.003/IF                                                  | 38                                           | NA/120/1                   | As above                                   | 0.5/NA                                                | 0.7/0.3                                        | 0.001/60                                                        |                              |
|                                       | *   | Triclosan                      | 0.7/3.2                                            | 23/NA      | 0.003/IF                                                  | 38                                           | NA/120/1                   | As above                                   | 0.5/NA                                                | 0.7/0.2                                        | 0.001/73                                                        |                              |
|                                       | *   | Tributyl phosphate             | 0.7/3.2                                            | 23/NA      | 0.003/IF                                                  | 38                                           | NA/120/1                   | As above                                   | 0.5/NA                                                | 0.5/0.3                                        | 0.0004/34                                                       |                              |
|                                       | *   | Tonalide                       | 0.7/3.2                                            | 23/NA      | 0.003/IF                                                  | 38                                           | NA/120/1                   | As above                                   | 0.5/NA                                                | 0.5/0.2                                        | 0.001/51                                                        |                              |
|                                       | *   | Tris (2-chloroethyl) phosphate | 0.7/3.2                                            | 23/NA      | 0.003/IF                                                  | 38                                           | NA/120/1                   | As above                                   | 0.5/NA                                                | 0.5/0.4                                        | 0.0002/19                                                       |                              |
|                                       | *   | Methyl dihydro-jasmonate       | 0.7/3.2                                            | 23/NA      | 0.003/IF                                                  | 38                                           | NA/120/1                   | As above                                   | 0.5/NA                                                | 0.3/0.1                                        | 0.0004/60                                                       |                              |
| Pilot/ Secondary                      | *   | Triphenyl phosphate            | 0.7/3.2                                            | 23/NA      | 0.003/IF                                                  | 38                                           | NA/120/1                   | As above                                   | 0.5/NA                                                | 0.1/0.02                                       | 0.0002/75                                                       | Kahl et al. [14]/ Germany    |
|                                       | D   | Acesulfame                     | 0.5/5.5                                            | 21/NA      | 0.03/CF                                                   | 22                                           | 5.5/60/12                  | Gravel (8-16)/ <i>Phragmites australis</i> | 3.0/-277/-228                                         | 19/19                                          | 0.0/0.0                                                         |                              |
| Full/ Tertiary                        | L   | N,N-diethyl-meta-toluamide     | NA/NA                                              | NA/NA      | 0.01/NA                                                   | 1.0                                          | 23/NA/12                   | NA/ <i>Phragmites australis</i>            | NA/NA                                                 | 1.5/0.03                                       | 0.02/98                                                         | Yi et al. [15]/ Singapore    |
| Full/ Primary                         | D   | Triclosan                      | NA/5.3                                             | NA/NA      | NA/NA                                                     | NA                                           | NA/264/12                  | Crushed rock (4-8)/ <i>Phragmites</i>      | NA/NA                                                 | 0.6/0.1                                        | NA/86                                                           | Vymazal et al. [16]/         |

| Wetland type/Scale/<br>type of treatment | W<br>T | PCPs                     | Depth<br>(m)/<br>Area<br>(m <sup>2</sup><br>PE <sup>-1</sup> ) | T<br>(°C)<br>/pH | HLR<br>(m <sup>3</sup> m <sup>-2</sup><br>d <sup>-1</sup> )/<br>OM | OLR<br>(g<br>COD<br>m <sup>-2</sup> d <sup>-1</sup> ) | HRT<br>(days)<br>/SA/ED<br>(months) | Filter media<br>(mm)/Plants                                                         | Effluent<br>DO<br>(mg L <sup>-1</sup> )/<br>ORP<br>(Inf/Eff)<br>(mV) | Influent/<br>Effluent<br>conc.<br>(µg L <sup>-1</sup> ) | Removal<br>rate<br>(mg m <sup>-2</sup><br>d <sup>-1</sup> )/<br>Removal<br>(%) | Author/<br>Country                     |
|------------------------------------------|--------|--------------------------|----------------------------------------------------------------|------------------|--------------------------------------------------------------------|-------------------------------------------------------|-------------------------------------|-------------------------------------------------------------------------------------|----------------------------------------------------------------------|---------------------------------------------------------|--------------------------------------------------------------------------------|----------------------------------------|
|                                          |        |                          |                                                                |                  |                                                                    |                                                       |                                     | <i>australis</i>                                                                    |                                                                      |                                                         |                                                                                | Czech Republic                         |
| Full/<br>Primary                         | D      | Triclocarban             | NA/5.3                                                         | NA/NA            | NA/NA                                                              | NA                                                    | As above                            | As above                                                                            | NA/NA                                                                | 0.1/0.01                                                | NA/86                                                                          | Vymazal et al. [16]/<br>Czech Republic |
|                                          | D      | Triclosan                | NA/11                                                          | NA/NA            | NA/NA                                                              | NA                                                    | NA/252/<br>12                       | Gravel (4-8)/<br><i>Phragmites australis</i>                                        | NA/NA                                                                | 0.2/0.1                                                 | NA/53                                                                          |                                        |
| Full/<br>Primary                         | D      | Triclocarban             | NA/11                                                          | NA/NA            | NA/NA                                                              | NA                                                    | As above                            | As above                                                                            | NA/NA                                                                | 0.03/0.01                                               | NA/67                                                                          | Vymazal et al. [16]/<br>Czech Republic |
|                                          | D      | Triclosan                | NA/5.5                                                         | NA/NA            | NA/NA                                                              | NA                                                    | NA/192/<br>12                       | Gravel (4-8)/<br><i>Phragmites australis</i> ,<br><i>Phragmites arundinacea</i>     | NA/NA                                                                | 0.2/0.1                                                 | NA/47                                                                          |                                        |
| Full/<br>Primary                         | D      | Triclocarban             | NA/5.5                                                         | NA/NA            | NA/NA                                                              | NA                                                    | As above                            | As above                                                                            | NA/NA                                                                | 0.3/0.01                                                | NA/96                                                                          | Vymazal et al. [16]/<br>Czech Republic |
|                                          | D      | Triclosan                | NA/4.6                                                         | NA/NA            | NA/NA                                                              | NA                                                    | NA/120/<br>12                       | Gravel<br>(8-16)/<br><i>Phragmites australis</i> ,<br><i>Phragmites arundinacea</i> | NA/NA                                                                | 0.5/0.1                                                 | NA/73                                                                          |                                        |
| Lab/<br>Primary                          | D      | Triclocarban             | NA/4.6                                                         | NA/NA            | NA/NA                                                              | NA                                                    | As above                            | As above                                                                            | NA/NA                                                                | 0.05/0.01                                               | NA/74                                                                          | Salcedo et al. [17]/<br>Mexico         |
|                                          | S      | Methyl dihydro-jasmonate | 0.33/2.3                                                       | NA/NA            | 0.25/IF                                                            | 51                                                    | 1.0/NA/<br>NA                       | 33 cm<br>Volcanic gravel (4.0)/<br><i>Phragmites australis</i>                      | NA/NA                                                                | 4.8/2.8                                                 | 0.5/42                                                                         |                                        |
| Lab/<br>Primary                          | S      | Galaxolide               | 0.33/2.3                                                       | NA/NA            | 0.25/IF                                                            | 51                                                    | As above                            | As above                                                                            | NA/NA                                                                | 2.7/1.1                                                 | 0.4/59                                                                         | Salcedo et al. [17]/<br>Mexico         |
|                                          | S      | Methyl dihydro-jasmonate | 0.33/2.3                                                       | NA/NA            | 0.25/IF                                                            | 51                                                    | 3.0/NA/<br>NA                       | 33 cm<br>Volcanic gravel (4.0)/<br><i>Phragmites australis</i>                      | NA/NA                                                                | 4.8/1.5                                                 | 0.8/70                                                                         |                                        |

| Wetland type/Scale/<br>type of treatment | W<br>T | PCPs                            | Depth<br>(m)/<br>Area<br>(m <sup>2</sup><br>PE <sup>-1</sup> ) | T<br>(°C)<br>/pH | HLR<br>(m <sup>3</sup> m <sup>-2</sup><br>d <sup>-1</sup> )/<br>OM | OLR<br>(g<br>COD<br>m <sup>-2</sup> d <sup>-1</sup> ) | HRT<br>(days)<br>/SA/ED<br>(months) | Filter media<br>(mm)/Plants                                           | Effluent<br>DO<br>(mg L <sup>-1</sup> )/<br>ORP<br>(Inf/Eff)<br>(mV) | Influent/<br>Effluent<br>conc.<br>(µg L <sup>-1</sup> ) | Removal<br>rate<br>(mg m <sup>-2</sup><br>d <sup>-1</sup> )/<br>Removal<br>(%) | Author/<br>Country                |
|------------------------------------------|--------|---------------------------------|----------------------------------------------------------------|------------------|--------------------------------------------------------------------|-------------------------------------------------------|-------------------------------------|-----------------------------------------------------------------------|----------------------------------------------------------------------|---------------------------------------------------------|--------------------------------------------------------------------------------|-----------------------------------|
| Lab/<br>Primary                          | S      | Galaxolide                      | 0.33/2.3                                                       | NA/NA            | 0.25/IF                                                            | 51                                                    | As above                            | As above                                                              | NA/NA                                                                | 2.7/0.4                                                 | 0.6/86                                                                         | Salcedo et<br>al. [17]/<br>Mexico |
|                                          | S      | Methyl<br>dihydro-<br>jasmonate | 0.33/2.3                                                       | NA/NA            | 0.25/IF                                                            | 51                                                    | 5.0/NA/<br>NA                       | 33 cm<br>Volcanic<br>gravel (4.0)/<br><i>Phragmites<br/>australis</i> | NA/NA                                                                | 4.8/0.8                                                 | 1.0/84                                                                         |                                   |
| Lab/<br>Primary                          | S      | Galaxolide                      | 0.33/2.3                                                       | NA/NA            | 0.25/IF                                                            | 51                                                    | As above                            | As above                                                              | NA/NA                                                                | 2.7/0.2                                                 | 0.6/93                                                                         | Salcedo et<br>al. [17]/<br>Mexico |
|                                          | S      | Methyl<br>dihydro-<br>jasmonate | 0.33/2.3                                                       | NA/NA            | 0.25/IF                                                            | 51                                                    | 1.0/NA/<br>NA                       | 33 cm River<br>gravel (10)/<br><i>Phragmites<br/>australis</i>        | NA/NA                                                                | 4.8/2.2                                                 | 0.6/54                                                                         |                                   |
| Lab/<br>Primary                          | S      | Galaxolide                      | 0.33/2.3                                                       | NA/NA            | 0.25/IF                                                            | 51                                                    | As above                            | As above                                                              | NA/NA                                                                | 2.7/0.8                                                 | 0.5/71                                                                         | Salcedo et<br>al. [17]/<br>Mexico |
|                                          | S      | Methyl<br>dihydro-<br>jasmonate | 0.33/2.3                                                       | NA/NA            | 0.25/IF                                                            | 51                                                    | 3.0/NA/<br>NA                       | 33 cm River<br>gravel (10)/<br><i>Phragmites<br/>australis</i>        | NA/NA                                                                | 4.8/1.3                                                 | 0.9/73                                                                         |                                   |
| Lab/<br>Primary                          | S      | Galaxolide                      | 0.33/2.3                                                       | NA/NA            | 0.25/IF                                                            | 51                                                    | As above                            | As above                                                              | NA/NA                                                                | 2.7/0.3                                                 | 0.6/88                                                                         | Salcedo et<br>al. [17]/<br>Mexico |
|                                          | S      | Methyl<br>dihydro-<br>jasmonate | 0.33/2.3                                                       | NA/NA            | 0.25/IF                                                            | 51                                                    | 5.0/NA/<br>NA                       | 33 cm River<br>gravel (10)/<br><i>Phragmites<br/>australis</i>        | NA/NA                                                                | 4.8/0.7                                                 | 1.0/86                                                                         |                                   |
| Lab/<br>Primary                          | S      | Galaxolide                      | 0.33/2.3                                                       | NA/NA            | 0.25/IF                                                            | 51                                                    | As above                            | As above                                                              | NA/NA                                                                | 2.7/0.2                                                 | 0.6/92                                                                         | Salcedo et<br>al. [17]/<br>Mexico |
|                                          | S      | Methyl<br>dihydro-<br>jasmonate | 0.33/2.3                                                       | NA/NA            | 0.25/IF                                                            | 51                                                    | 1.0/NA/<br>NA                       | 33 cm<br>Volcanic<br>gravel (4.0)/<br><i>Typha latifolia</i>          | NA/NA                                                                | 4.8/0.9                                                 | 1.0/81                                                                         |                                   |
| Lab/<br>Primary                          | S      | Galaxolide                      | 0.33/2.3                                                       | NA/NA            | 0.25/IF                                                            | 51                                                    | As above                            | As above                                                              | NA/NA                                                                | 2.7/1.6                                                 | 0.3/41                                                                         | Salcedo et<br>al. [17]/<br>Mexico |
|                                          | S      | Methyl<br>dihydro-<br>jasmonate | 0.33/2.3                                                       | NA/NA            | 0.25/IF                                                            | 51                                                    | 3.0/NA/<br>NA                       | 33 cm<br>Volcanic<br>gravel (4.0)/<br><i>Typha latifolia</i>          | NA/NA                                                                | 4.8/0.4                                                 | 1.1/93                                                                         |                                   |
|                                          | S      | Galaxolide                      | 0.33/2.3                                                       | NA/NA            | 0.25/IF                                                            | 51                                                    | As above                            | As above                                                              | NA/NA                                                                | 2.7/1.4                                                 | 0.3/49                                                                         |                                   |

| Wetland type/Scale/ type of treatment | W T | PCPs                     | Depth (m)/ Area (m <sup>2</sup> PE <sup>-1</sup> ) | T (°C) /pH | HLR (m <sup>3</sup> m <sup>-2</sup> d <sup>-1</sup> )/ OM | OLR (g COD m <sup>-2</sup> d <sup>-1</sup> ) | HRT (days) /SA/ED (months) | Filter media (mm)/Plants                            | Effluent DO (mg L <sup>-1</sup> )/ ORP (Inf/Eff) (mV) | Influent/ Effluent conc. (µg L <sup>-1</sup> ) | Removal rate (mg m <sup>-2</sup> d <sup>-1</sup> )/ Removal (%) | Author/ Country             |
|---------------------------------------|-----|--------------------------|----------------------------------------------------|------------|-----------------------------------------------------------|----------------------------------------------|----------------------------|-----------------------------------------------------|-------------------------------------------------------|------------------------------------------------|-----------------------------------------------------------------|-----------------------------|
| Lab/ Primary                          | S   | Methyl dihydro-jasmonate | 0.33/2.3                                           | NA/NA      | 0.25/IF                                                   | 51                                           | 5.0/NA/ NA                 | 33 cm Volcanic gravel (4.0)/ <i>Typha latifolia</i> | NA/NA                                                 | 4.8/0.2                                        | 1.2/96                                                          | Salcedo et al. [17]/ Mexico |
| Lab/ Primary                          | S   | Galaxolide               | 0.33/2.3                                           | NA/NA      | 0.25/IF                                                   | 51                                           | As above                   | As above                                            | NA/NA                                                 | 2.7/0.4                                        | 0.6/84                                                          | Salcedo et al. [17]/ Mexico |
| Lab/ Primary                          | S   | Methyl dihydro-jasmonate | 0.33/2.3                                           | NA/NA      | 0.25/IF                                                   | 51                                           | 1.0/NA/ NA                 | 33 cm River gravel (10)/ <i>Typha latifolia</i>     | NA/NA                                                 | 4.8/1.2                                        | 0.9/76                                                          |                             |
| Lab/ Primary                          | S   | Galaxolide               | 0.33/2.3                                           | NA/NA      | 0.25/IF                                                   | 51                                           | As above                   | As above                                            | NA/NA                                                 | 2.7/1.8                                        | 0.2/34                                                          | Salcedo et al. [17]/ Mexico |
| Lab/ Primary                          | S   | Methyl dihydro-jasmonate | 0.33/2.3                                           | NA/NA      | 0.25/IF                                                   | 51                                           | 3.0/NA/ NA                 | 33 cm River gravel (10)/ <i>Typha latifolia</i>     | NA/NA                                                 | 4.8/0.3                                        | 1.1/95                                                          |                             |
| Lab/ Primary                          | S   | Galaxolide               | 0.33/2.3                                           | NA/NA      | 0.25/IF                                                   | 51                                           | As above                   | As above                                            | NA/NA                                                 | 2.7/1.4                                        | 0.3/47                                                          | Salcedo et al. [17]/ Mexico |
| Lab/ Primary                          | S   | Methyl dihydro-jasmonate | 0.33/2.3                                           | NA/NA      | 0.25/IF                                                   | 51                                           | 5.0/NA/ NA                 | 33 cm River gravel (10)/ <i>Typha latifolia</i>     | NA/NA                                                 | 4.8/0.2                                        | 1.2/96                                                          |                             |
| Lab/ Primary                          | S   | Galaxolide               | 0.33/2.3                                           | NA/NA      | 0.25/IF                                                   | 51                                           | As above                   | As above                                            | NA/NA                                                 | 2.7/0.3                                        | 0.6/87                                                          | Salcedo et al. [17]/ Mexico |
| Lab/ Primary                          | S   | Methyl dihydro-jasmonate | 0.33/2.3                                           | NA/NA      | 0.25/IF                                                   | 51                                           | 1.0/NA/ NA                 | 33 cm Volcanic gravel (4.0)/ <i>Cyperus papyrus</i> | NA/NA                                                 | 4.8/2.1                                        | 0.7/56                                                          |                             |
| Lab/ Primary                          | S   | Galaxolide               | 0.33/2.3                                           | NA/NA      | 0.25/IF                                                   | 51                                           | As above                   | As above                                            | NA/NA                                                 | 2.7/1.2                                        | 0.4/54                                                          | Salcedo et al. [17]/ Mexico |
| Lab/ Primary                          | S   | Methyl dihydro-jasmonate | 0.33/2.3                                           | NA/NA      | 0.25/IF                                                   | 51                                           | 3.0/NA/ NA                 | 33 cm Volcanic gravel (4.0)/ <i>Cyperus papyrus</i> | NA/NA                                                 | 4.8/0.7                                        | 1.0/85                                                          |                             |
| Lab/ Primary                          | S   | Galaxolide               | 0.33/2.3                                           | NA/NA      | 0.25/IF                                                   | 51                                           | As above                   | As above                                            | NA/NA                                                 | 2.7/0.7                                        | 0.5/73                                                          | Salcedo et al. [17]/ Mexico |
| Lab/ Primary                          | S   | Methyl dihydro-jasmonate | 0.33/2.3                                           | NA/NA      | 0.25/IF                                                   | 51                                           | 5.0/NA/ NA                 | 33 cm Volcanic gravel (4.0)/                        | NA/NA                                                 | 4.8/0.3                                        | 1.1/93                                                          |                             |

| Wetland type/Scale/<br>type of treatment | W<br>T | PCPs                            | Depth<br>(m)/<br>Area<br>(m <sup>2</sup><br>PE <sup>-1</sup> ) | T<br>(°C)<br>/pH | HLR<br>(m <sup>3</sup> m <sup>-2</sup><br>d <sup>-1</sup> )/<br>OM | OLR<br>(g<br>COD<br>m <sup>-2</sup> d <sup>-1</sup> ) | HRT<br>(days)<br>/SA/ED<br>(months) | Filter media<br>(mm)/Plants                           | Effluent<br>DO<br>(mg L <sup>-1</sup> )/<br>ORP<br>(Inf/Eff)<br>(mV) | Influent/<br>Effluent<br>conc.<br>(µg L <sup>-1</sup> ) | Removal<br>rate<br>(mg m <sup>-2</sup><br>d <sup>-1</sup> )/<br>Removal<br>(%) | Author/<br>Country                |
|------------------------------------------|--------|---------------------------------|----------------------------------------------------------------|------------------|--------------------------------------------------------------------|-------------------------------------------------------|-------------------------------------|-------------------------------------------------------|----------------------------------------------------------------------|---------------------------------------------------------|--------------------------------------------------------------------------------|-----------------------------------|
|                                          |        |                                 |                                                                |                  |                                                                    |                                                       |                                     | <i>Cyperus papyrus</i>                                |                                                                      |                                                         |                                                                                |                                   |
| Lab/<br>Primary                          | S      | Galaxolide                      | 0.33/2.3                                                       | NA/NA            | 0.25/IF                                                            | 51                                                    | As above                            | As above                                              | NA/NA                                                                | 2.7/0.5                                                 | 0.6/83                                                                         | Salcedo et<br>al. [17]/<br>Mexico |
|                                          | S      | Methyl<br>dihydro-<br>jasmonate | 0.33/2.3                                                       | NA/NA            | 0.25/IF                                                            | 51                                                    | 1.0/NA/<br>NA                       | 33 cm River<br>gravel (10)/<br><i>Cyperus papyrus</i> | NA/NA                                                                | 4.8/2.6                                                 | 0.6/47                                                                         |                                   |
| Lab/<br>Primary                          | S      | Galaxolide                      | 0.33/2.3                                                       | NA/NA            | 0.25/IF                                                            | 51                                                    | As above                            | As above                                              | NA/NA                                                                | 2.7/1.7                                                 | 0.3/38                                                                         | Salcedo et<br>al. [17]/<br>Mexico |
|                                          | S      | Methyl<br>dihydro-<br>jasmonate | 0.33/2.3                                                       | NA/NA            | 0.25/IF                                                            | 51                                                    | 3.0/NA/<br>NA                       | 33 cm River<br>gravel (10)/<br><i>Cyperus papyrus</i> | NA/NA                                                                | 4.8/0.6                                                 | 1.1/87                                                                         |                                   |
| Lab/<br>Primary                          | S      | Galaxolide                      | 0.33/2.3                                                       | NA/NA            | 0.25/IF                                                            | 51                                                    | As above                            | As above                                              | NA/NA                                                                | 2.7/0.9                                                 | 0.5/68                                                                         | Salcedo et<br>al. [17]/<br>Mexico |
|                                          | S      | Methyl<br>dihydro-<br>jasmonate | 0.33/2.3                                                       | NA/NA            | 0.25/IF                                                            | 51                                                    | 5.0/NA/<br>NA                       | 33 cm River<br>gravel (10)/<br><i>Cyperus papyrus</i> | NA/NA                                                                | 4.8/0.3                                                 | 1.1/93                                                                         |                                   |
| Lab/<br>Primary                          | S      | Galaxolide                      | 0.33/2.3                                                       | NA/NA            | 0.25/IF                                                            | 51                                                    | As above                            | As above                                              | NA/NA                                                                | 2.7/0.3                                                 | 0.6/90                                                                         | Salcedo et<br>al. [17]/<br>Mexico |
|                                          | S      | Methyl<br>dihydro-<br>jasmonate | 0.33/2.3                                                       | NA/NA            | 0.25/IF                                                            | 51                                                    | 1.0/NA/<br>NA                       | 33 cm<br>Volcanic<br>gravel (4.0)/<br>Unplanted       | NA/NA                                                                | 4.8/2.5                                                 | 0.6/49                                                                         |                                   |
| Lab/<br>Primary                          | S      | Galaxolide                      | 0.33/2.3                                                       | NA/NA            | 0.25/IF                                                            | 51                                                    | As above                            | As above                                              | NA/NA                                                                | 2.7/1.8                                                 | 0.2/33                                                                         | Salcedo et<br>al. [17]/<br>Mexico |
|                                          | S      | Methyl<br>dihydro-<br>jasmonate | 0.33/2.3                                                       | NA/NA            | 0.25/IF                                                            | 51                                                    | 3.0/NA/<br>NA                       | 33 cm<br>Volcanic<br>gravel (4.0)/<br>Unplanted       | NA/NA                                                                | 4.8/0.9                                                 | 1.0/81                                                                         |                                   |
| Lab/<br>Primary                          | S      | Galaxolide                      | 0.33/2.3                                                       | NA/NA            | 0.25/IF                                                            | 51                                                    | As above                            | As above                                              | NA/NA                                                                | 2.7/1.8                                                 | 0.2/32                                                                         | Salcedo et<br>al. [17]/<br>Mexico |
|                                          | S      | Methyl<br>dihydro-<br>jasmonate | 0.33/2.3                                                       | NA/NA            | 0.25/IF                                                            | 51                                                    | 5.0/NA/<br>NA                       | 33 cm<br>Volcanic<br>gravel (4.0)/<br>Unplanted       | NA/NA                                                                | 4.8/0.7                                                 | 1.0/86                                                                         |                                   |

| Wetland type/Scale/ type of treatment | W T | PCPs                     | Depth (m)/ Area (m <sup>2</sup> PE <sup>-1</sup> ) | T (°C) /pH | HLR (m <sup>3</sup> m <sup>-2</sup> d <sup>-1</sup> )/ OM | OLR (g COD m <sup>-2</sup> d <sup>-1</sup> ) | HRT (days) /SA/ED (months) | Filter media (mm)/Plants                | Effluent DO (mg L <sup>-1</sup> )/ ORP (Inf/Eff) (mV) | Influent/ Effluent conc. (µg L <sup>-1</sup> ) | Removal rate (mg m <sup>-2</sup> d <sup>-1</sup> )/ Removal (%) | Author/ Country             |
|---------------------------------------|-----|--------------------------|----------------------------------------------------|------------|-----------------------------------------------------------|----------------------------------------------|----------------------------|-----------------------------------------|-------------------------------------------------------|------------------------------------------------|-----------------------------------------------------------------|-----------------------------|
| Lab/ Primary                          | S   | Galaxolide               | 0.33/2.3                                           | NA/NA      | 0.25/IF                                                   | 51                                           | As above                   | As above                                | NA/NA                                                 | 2.7/1.3                                        | 0.3/52                                                          | Salcedo et al. [17]/ Mexico |
|                                       | S   | Methyl dihydro-jasmonate | 0.33/2.3                                           | NA/NA      | 0.25/IF                                                   | 51                                           | 1.0/NA/ NA                 | 33 cm River gravel (10)/ Unplanted      | NA/NA                                                 | 4.8/2.7                                        | 0.5/45                                                          |                             |
| Lab/ Primary                          | S   | Galaxolide               | 0.33/2.3                                           | NA/NA      | 0.25/IF                                                   | 51                                           | As above                   | As above                                | NA/NA                                                 | 2.7/2.1                                        | 0.1/22                                                          | Salcedo et al. [17]/ Mexico |
|                                       | S   | Methyl dihydro-jasmonate | 0.33/2.3                                           | NA/NA      | 0.25/IF                                                   | 51                                           | 3.0/NA/ NA                 | 33 cm River gravel (10)/ Unplanted      | NA/NA                                                 | 4.8/1.0                                        | 1.0/79                                                          |                             |
| Lab/ Primary                          | S   | Galaxolide               | 0.33/2.3                                           | NA/NA      | 0.25/IF                                                   | 51                                           | As above                   | As above                                | NA/NA                                                 | 2.7/1.7                                        | 0.2/35                                                          | Salcedo et al. [17]/ Mexico |
|                                       | S   | Methyl dihydro-jasmonate | 0.33/2.3                                           | NA/NA      | 0.25/IF                                                   | 51                                           | 5.0/NA/ NA                 | 33 cm River gravel (10)/ Unplanted      | NA/NA                                                 | 4.8/0.6                                        | 1.1/88                                                          |                             |
| Full/ Tertiary                        | S   | Galaxolide               | 0.33/2.3                                           | NA/NA      | 0.25/IF                                                   | 51                                           | As above                   | As above                                | NA/NA                                                 | 2.7/1.3                                        | 0.3/50                                                          | Petrie et al. [18]/UK       |
|                                       | D   | Oxybenzone               | NA/NA                                              | 16/8.6     | 3.4/NA                                                    | NA                                           | 14/NA/2                    | Steel slag/ <i>Phragmites australis</i> | 6.0/NA                                                | 0.05/0.06                                      | NR                                                              |                             |
| Full/ Tertiary                        | D   | Sulisobenzon             | NA/NA                                              | 16/8.6     | 3.4/NA                                                    | NA                                           | 14/NA/2                    | As above                                | 6.0/NA                                                | 4.2/3.8                                        | 1.2/8.7                                                         | Petrie et al. [18]/UK       |
|                                       | D   | Methylparaben            | NA/NA                                              | 16/8.6     | 3.4/NA                                                    | NA                                           | 14/NA/2                    | As above                                | 6.0/NA                                                | 0.024/0.023                                    | 0.004/5.0                                                       |                             |
|                                       | D   | Propylparaben            | NA/NA                                              | 16/8.6     | 3.4/NA                                                    | NA                                           | 14/NA/2                    | As above                                | 6.0/NA                                                | 0.006/0.008                                    | NR                                                              |                             |
|                                       | D   | Triclosan                | NA/NA                                              | 16/8.6     | 3.4/NA                                                    | NA                                           | 14/NA/2                    | As above                                | 6.0/NA                                                | 0.1/0.1                                        | NR                                                              |                             |
|                                       | D   | Oxybenzone               | NA/NA                                              | 16/8.0     | 3.4/NA                                                    | NA                                           | 14/NA/2                    | Gravel/ <i>Phragmites australis</i>     | 5.5/NA                                                | 0.05/0.03                                      | 0.05/32                                                         |                             |
|                                       | D   | Sulisobenzon             | NA/NA                                              | 16/8.0     | 3.4/NA                                                    | NA                                           | 14/NA/2                    | As above                                | 5.5/NA                                                | 4.2/3.9                                        | 1.0/7.3                                                         |                             |
|                                       | D   | Methylparaben            | NA/NA                                              | 16/8.0     | 3.4/NA                                                    | NA                                           | 14/NA/2                    | As above                                | 5.5/NA                                                | 0.024/0.02                                     | 0.01/16                                                         |                             |
|                                       | D   | Propylparaben            | NA/NA                                              | 16/8.0     | 3.4/NA                                                    | NA                                           | 14/NA/2                    | As above                                | 5.5/NA                                                | 0.006/0.006                                    | 0.0/1.6                                                         |                             |
|                                       | D   | Triclosan                | NA/NA                                              | 16/8.0     | 3.4/NA                                                    | NA                                           | 14/NA/2                    | As above                                | 5.5/NA                                                | 0.13/0.1                                       | 0.08/19                                                         |                             |
|                                       | D   | Oxybenzone               | NA/NA                                              | 16/8.0     | 3.4/NA                                                    | NA                                           | 14/NA/2                    | As above                                | 5.5/NA                                                | 0.05/0.03                                      | 0.05/32                                                         |                             |



| Wetland type/Scale/ type of treatment | W T | PCPs          | Depth (m)/ Area (m <sup>2</sup> PE <sup>-1</sup> ) | T (°C) /pH | HLR (m <sup>3</sup> m <sup>-2</sup> d <sup>-1</sup> )/ OM | OLR (g COD m <sup>-2</sup> d <sup>-1</sup> ) | HRT (days) /SA/ED (months) | Filter media (mm)/Plants                                                                | Effluent DO (mg L <sup>-1</sup> )/ ORP (Inf/Eff) (mV) | Influent/ Effluent conc. (µg L <sup>-1</sup> ) | Removal rate (mg m <sup>-2</sup> d <sup>-1</sup> )/ Removal (%) | Author/ Country             |
|---------------------------------------|-----|---------------|----------------------------------------------------|------------|-----------------------------------------------------------|----------------------------------------------|----------------------------|-----------------------------------------------------------------------------------------|-------------------------------------------------------|------------------------------------------------|-----------------------------------------------------------------|-----------------------------|
| Full/ Tertiary                        | D   | Oxybenzone    | NA/NA                                              | 16/8.2     | 3.4/NA                                                    | NA                                           | 14/NA/12                   | Gravel/ <i>Phragmites australis</i>                                                     | 6.0/NA                                                | 0.05/0.07                                      | NR                                                              | Petrie et al. [18]/UK       |
|                                       | D   | Sulisobenzene | NA/NA                                              | 16/8.2     | 3.4/NA                                                    | NA                                           | 14/NA/12                   | As above                                                                                | 6.0/NA                                                | 4.2/3.7                                        | 1.5/11                                                          |                             |
|                                       | D   | Methylparaben | NA/NA                                              | 16/8.2     | 3.4/NA                                                    | NA                                           | 14/NA/12                   | As above                                                                                | 6.0/NA                                                | 0.024/0.02                                     | 0.01/17                                                         |                             |
|                                       | D   | Propylparaben | NA/NA                                              | 16/8.2     | 3.4/NA                                                    | NA                                           | 14/NA/12                   | As above                                                                                | 6.0/NA                                                | 0.006/0.009                                    | NR                                                              |                             |
| Pilot/ Secondary                      | D   | Triclosan     | NA/NA                                              | 16/8.2     | 3.4/NA                                                    | NA                                           | 14/NA/12                   | As above                                                                                | 6.0/NA                                                | 0.13/0.1                                       | 0.09/21                                                         | Nivala et al. [19]/ Germany |
|                                       | D   | Acesulfame    | 0.5/5.3                                            | 12/7.2     | 0.03/CF                                                   | 23                                           | 5.5/60/12                  | Gravel (8-16)/ <i>Phragmites australis</i>                                              | 3.0/-270/-220                                         | 19/18                                          | 0.03/5.0                                                        |                             |
| Full/ Tertiary                        | L   | Triclosan     | NA/NA                                              | NA/NA      | NA/NA                                                     | NA                                           | NA/NA/ 1.0                 | NA/ <i>Typha angustifolia</i> ; <i>Chrysopogon zizanioides</i> ; <i>Cyperus papyrus</i> | NA/NA                                                 | 0.003/0.001                                    | NA/57                                                           | Wang et al. [20]/ Singapore |
| Full/ Tertiary                        | L   | Triclosan     | NA/NA                                              | NA/NA      | NA/NA                                                     | NA                                           | NA/NA/ 1.0                 | As above                                                                                | NA/NA                                                 | 0.003/0.002                                    | NA/29                                                           | Wang et al. [20]/ Singapore |
| <b>Aerated HFCW</b>                   |     |               |                                                    |            |                                                           |                                              |                            |                                                                                         |                                                       |                                                |                                                                 |                             |
| Pilot/ Secondary                      | D   | Acesulfame    | 1.0/1.4                                            | 21/NA      | 0.1/CF                                                    | 87                                           | 5.5/60/12                  | Gravel (8-16)/ <i>Phragmites australis</i>                                              | 10/-277/+208                                          | 19/4.0                                         | 2.1/79                                                          | Kahl et al. [14]/ Germany   |
| Pilot/ Secondary                      | D   | Acesulfame    | 1.0/1.3                                            | 12/6.9     | 0.1/CF                                                    | 90                                           | 5.5/60/12                  | Gravel (8-16)/ <i>Phragmites australis</i>                                              | 10/-270/+183                                          | 19/7.2                                         | 1.6/62                                                          | Nivala et al. [19]/ Germany |

Note: Horizontal flow constructed wetland (HFCW); Wastewater type (WT); Domestic (D); Synthetic (S); Landfill leachate (L); Personal care products (PCPs); Temperature (T); Hydraulic loading rate (HLR); Operational mode (OM); Intermittently fed (IF); Continuously fed (CF); Organic loading rate (OLR); Chemical oxygen demand (COD); Hydraulic retention time (HRT); System age (SA); Experiment duration (ED); Dissolved oxygen (DO); Oxidation-reduction potential (ORP); Not available (NA); Not removed (NR).

Domestic (55%) and Industrial discharge (45%) (\*); The Population equivalent (PE) is calculated based on the common relation  $1 \text{ PE} = 60 \text{ g BOD d}^{-1}$ . BOD values were approximated using the ratio  $\text{COD/BOD} = 2$  in the studies where BOD was not reported [10,13], and COD values were approximated using the ratio  $\text{COD} = 2\text{BOD}$  in the studies where COD was not reported [5,12,14,17,19].

**Table S3.** The performance of VFCW for personal care products removal.

| Wetland type/Scale/ type of treatment | W T | PCPs                     | Depth (m)/ Area (m <sup>2</sup> PE <sup>-1</sup> ) | T (°C) /pH | HLR (m <sup>3</sup> m <sup>-2</sup> d <sup>-1</sup> )/ OM | OLR (g COD m <sup>-2</sup> d <sup>-1</sup> ) | HRT (days) /SA/ED (months) | Filter media (mm)/Plants                                              | Effluent DO (mg L <sup>-1</sup> )/ ORP (Inf/Eff) (mV) | Influent/ Effluent conc. (µg L <sup>-1</sup> ) | Removal rate (mg m <sup>-2</sup> d <sup>-1</sup> )/ Removal (%) | Author/ Country                |
|---------------------------------------|-----|--------------------------|----------------------------------------------------|------------|-----------------------------------------------------------|----------------------------------------------|----------------------------|-----------------------------------------------------------------------|-------------------------------------------------------|------------------------------------------------|-----------------------------------------------------------------|--------------------------------|
| Pilot/ Secondary                      | D   | Methyl dihydro-jasmonate | 1.0/3.5                                            | NA/8.1     | 0.07/IF                                                   | 35                                           | 0.25/60/2                  | 80 cm Gravel (0.5–4) 20 cm Gravel (8-16)/ <i>Phragmites australis</i> | 9.0/NA                                                | 23/0.2                                         | 1.6/99                                                          | Matamoros et al. [21]/ Denmark |
|                                       | D   | Hydrocinnamic acid       | 1.0/3.5                                            | NA/8.1     | 0.07/IF                                                   | 35                                           | 0.25/60/2                  | As above                                                              | 9.0/NA                                                | 15/0.2                                         | 1.1/99                                                          |                                |
|                                       | D   | Oxybenzone               | 1.0/3.5                                            | NA/8.1     | 0.07/IF                                                   | 35                                           | 0.25/60/2                  | As above                                                              | 9.0/NA                                                | 15/0.4                                         | 1.0/97                                                          |                                |
|                                       | D   | Galaxolide               | 1.0/3.5                                            | NA/8.1     | 0.07/IF                                                   | 35                                           | 0.25/60/2                  | As above                                                              | 9.0/NA                                                | 5.6/0.6                                        | 0.4/90                                                          |                                |
|                                       | D   | Tonalide                 | 1.0/3.5                                            | NA/8.1     | 0.07/IF                                                   | 35                                           | 0.25/60/2                  | As above                                                              | 9.0/NA                                                | 1.0/0.2                                        | 0.1/82                                                          |                                |
| Pilot/ Secondary                      | D   | Tonalide                 | 0.85/NA                                            | 19/6.6     | 0.095/IF                                                  | NA                                           | NA/12/2                    | Sand (1-3)/ <i>Phragmites australis</i>                               | 5.5/-263/+169                                         | 0.2/0.04                                       | 0.01/78                                                         | Ávila et al. [22]/ Germany     |
|                                       | D   | Oxybenzone               | 0.85/NA                                            | 19/6.6     | 0.095/IF                                                  | NA                                           | NA/12/2                    | As above                                                              | As above                                              | 2.6/0.1                                        | 0.2/96                                                          |                                |
|                                       | D   | Triclosan                | 0.85/NA                                            | 19/6.6     | 0.095/IF                                                  | NA                                           | NA/12/2                    | As above                                                              | As above                                              | 0.4/0.1                                        | 0.04/89                                                         |                                |
| Pilot/ Secondary                      | D   | Tonalide                 | 0.85/NA                                            | 19/7.2     | 0.095/IF                                                  | NA                                           | NA/12/2                    | Gravel (4-8)/ <i>Phragmites australis</i>                             | 3.4/-263/+98                                          | 0.2/0.1                                        | 0.01/61                                                         | Ávila et al. [22]/ Germany     |
|                                       | D   | Oxybenzone               | 0.85/NA                                            | 19/7.2     | 0.095/IF                                                  | NA                                           | NA/12/2                    | As above                                                              | As above                                              | 2.6/0.3                                        | 0.2/89                                                          |                                |
|                                       | D   | Triclosan                | 0.85/NA                                            | 19/7.2     | 0.095/IF                                                  | NA                                           | NA/12/2                    | As above                                                              | As above                                              | 0.4/0.1                                        | 0.03/73                                                         |                                |
| Pilot/ Secondary                      | D   | Acesulfame               | 0.85/2.1                                           | 21/NA      | 0.09/CF                                                   | 58                                           | NA/60/12                   | Gravel (4-8)/ <i>Phragmites australis</i>                             | 4.0/-277/+111                                         | 19/19.4                                        | NR                                                              | Kahl et al. [14]/ Germany      |
| Pilot/ Primary                        | D   | Triclosan                | 0.69/NA                                            | NA/NA      | 0.03/IF                                                   | 1.0                                          | 7.0/NA/ 3.0                | 15 cm Gravel (20-30) 45 cm of expanded                                | NA/NA                                                 | 0.8/0.1                                        | 0.02/84                                                         | Francini et al. [23]/Italy     |

| Wetland type/Scale/ type of treatment | W T    | PCPs                       | Depth (m)/ Area (m <sup>2</sup> PE <sup>-1</sup> ) | T (°C) /pH      | HLR (m <sup>3</sup> m <sup>-2</sup> d <sup>-1</sup> )/ OM | OLR (g COD m <sup>-2</sup> d <sup>-1</sup> ) | HRT (days) /SA/ED (months) | Filter media (mm)/Plants                                                                                                                                                                     | Effluent DO (mg L <sup>-1</sup> )/ ORP (Inf/Eff) (mV) | Influent/ Effluent conc. (µg L <sup>-1</sup> ) | Removal rate (mg m <sup>-2</sup> d <sup>-1</sup> )/ Removal (%) | Author/ Country            |
|---------------------------------------|--------|----------------------------|----------------------------------------------------|-----------------|-----------------------------------------------------------|----------------------------------------------|----------------------------|----------------------------------------------------------------------------------------------------------------------------------------------------------------------------------------------|-------------------------------------------------------|------------------------------------------------|-----------------------------------------------------------------|----------------------------|
| Pilot/ Primary                        | D      | Triclosan                  | 0.69/NA                                            | NA/NA           | 0.03/IF                                                   | 1.0                                          | 7.0/NA/ 3.0                | Agrileca clay (8-20)<br>5 cm Gravel (20-30)/<br><i>Phragmites australis</i><br>15 cm Gravel (20-30)<br>45 cm of expanded Agrileca clay (8-20)<br>5 cm Gravel (20-30)/ <i>Salix matsudana</i> | NA/NA                                                 | 0.8/0.1                                        | 0.02/83                                                         | Francini et al. [23]/Italy |
| Pilot/ Secondary                      | D      | N,N-diethyl-meta-toluamide | 0.8/1.6                                            | 21/6.9          | 0.1/IF                                                    | 40                                           | NA/76/4                    | 10 cm Sand (1-2)<br>70 cm Gravel (3-8)/<br><i>Phragmites australis</i>                                                                                                                       | 0.5/+33/-16                                           | 2.4/1.7                                        | 0.1/28                                                          | Sgroi et al. [24]/Spain    |
| Lab/ Primary                          | D<br>S | Sucralose<br>Triclosan     | 0.8/1.6<br>0.6/NA                                  | 21/6.9<br>NA/NA | 0.1/IF<br>0.08/CF                                         | 40<br>4.0                                    | NA/76/4<br>3.0/5.0/ 3.0    | As above<br>20 cm Washed river sand (0-3.0)<br>20 cm Birnessite-coated sand (1.0-3.0)                                                                                                        | As above<br>2.4/NA                                    | 13.1/12.5<br>80/7.2                            | 0.1/4.4<br>5.8/91                                               | Xie et al. [25]/China      |

| Wetland type/Scale/ type of treatment | W T | PCPs       | Depth (m)/ Area (m <sup>2</sup> PE <sup>-1</sup> ) | T (°C) /pH | HLR (m <sup>3</sup> m <sup>-2</sup> d <sup>-1</sup> )/ OM | OLR (g COD m <sup>-2</sup> d <sup>-1</sup> ) | HRT (days) /SA/ED (months) | Filter media (mm)/Plants                                                                       | Effluent DO (mg L <sup>-1</sup> )/ ORP (Inf/Eff) (mV) | Influent/ Effluent conc. (µg L <sup>-1</sup> ) | Removal rate (mg m <sup>-2</sup> d <sup>-1</sup> )/ Removal (%) | Author/ Country             |
|---------------------------------------|-----|------------|----------------------------------------------------|------------|-----------------------------------------------------------|----------------------------------------------|----------------------------|------------------------------------------------------------------------------------------------|-------------------------------------------------------|------------------------------------------------|-----------------------------------------------------------------|-----------------------------|
| Lab/ Primary                          | S   | Triclosan  | 0.6/NA                                             | NA/NA      | 0.08/CF                                                   | 4.0                                          | 3.0/5.0/ 3.0               | 10 cm Gravel (10-30)/ <i>Phragmites australis</i><br>40 cm Washed river sand (0-3.0)           | 2.4/NA                                                | 80/13                                          | 5.4/84                                                          | Xie et al. [25]/China       |
| Pilot/ Secondary                      | D   | Acesulfame | 0.85/2.0                                           | 13/6.6     | 0.09/CF                                                   | 61                                           | NA/60/12                   | 10 cm Gravel (10-30)/ <i>Phragmites australis</i><br>Gravel (4-8)/ <i>Phragmites australis</i> | 5.0/-270/ +108                                        | 19/20                                          | NR                                                              | Nivala et al. [19]/ Germany |
| Lab/ Primary                          | S   | Triclosan  | 0.64/11                                            | 20/8.0     | 0.02/ NA                                                  | 11                                           | 7.0/1.0/16                 | 30 cm Gravel (10-15) 80% Limestone / <i>Phalaris arundinacea</i>                               | 8.5/NA                                                | 500/0.2                                        | 11/100                                                          | Button et al. [26]/ Canada  |
| Lab/ Primary                          | S   | Triclosan  | 0.64/11                                            | 20/8.0     | 0.02/ NA                                                  | 11                                           | 7.0/1.0/16                 | 30 cm Gravel (10-15) 80% Limestone /Unplanted                                                  | 8.5/NA                                                | 500/0.2                                        | 11/100                                                          | Button et al. [26]/ Canada  |

Aerated VFCW

| Wetland type/Scale/<br>type of treatment | W<br>T | PCPs       | Depth<br>(m)/<br>Area<br>(m <sup>2</sup><br>PE <sup>-1</sup> ) | T<br>(°C)<br>/pH | HLR<br>(m <sup>3</sup> m <sup>-2</sup><br>d <sup>-1</sup> )/<br>OM | OLR<br>(g<br>COD<br>m <sup>-2</sup> d <sup>-1</sup> ) | HRT<br>(days)<br>/SA/ED<br>(months) | Filter media<br>(mm)/Plants                          | Effluent<br>DO<br>(mg L <sup>-1</sup> )/<br>ORP<br>(Inf/Eff)<br>(mV) | Influent/<br>Effluent<br>conc.<br>(µg L <sup>-1</sup> ) | Removal<br>rate<br>(mg m <sup>-2</sup><br>d <sup>-1</sup> )/<br>Removal<br>(%) | Author/<br>Country               |
|------------------------------------------|--------|------------|----------------------------------------------------------------|------------------|--------------------------------------------------------------------|-------------------------------------------------------|-------------------------------------|------------------------------------------------------|----------------------------------------------------------------------|---------------------------------------------------------|--------------------------------------------------------------------------------|----------------------------------|
| Pilot/<br>Secondary                      | D      | Tonalide   | 0.85/NA                                                        | 19/6.1           | 0.095/IF                                                           | NA                                                    | NA/12/2                             | Gravel<br>(8-16)/<br><i>Phragmites<br/>australis</i> | 5.2/-263/<br>+172                                                    | 0.2/0.03                                                | 0.01/83                                                                        | Ávila et al.<br>[22]/<br>Germany |
| Pilot/<br>Secondary                      | D      | Oxybenzone | 0.85/NA                                                        | 19/6.1           | 0.095/IF                                                           | NA                                                    | NA/12/2                             | As above                                             | As above                                                             | 2.6/0.2                                                 | 0.2/91                                                                         | Kahl et al.<br>[14]/<br>Germany  |
|                                          | D      | Triclosan  | 0.85/NA                                                        | 19/6.1           | 0.095/IF                                                           | NA                                                    | NA/12/2                             | As above                                             | As above                                                             | 0.4/0.1                                                 | 0.04/86                                                                        |                                  |
|                                          | D      | Acesulfame | 0.85/2.1                                                       | 21/NA            | 0.09/CF                                                            | 58                                                    | NA/60/12                            | Gravel<br>(8-16)/<br><i>Phragmites<br/>australis</i> | 8.0/-277<br>/+86                                                     | 19/9.0                                                  | 0.9/53                                                                         |                                  |
| Pilot/<br>Secondary                      | D      | Acesulfame | 0.85/2.0                                                       | 12/7.0           | 0.09/CF                                                            | 61                                                    | NA/60/12                            | Gravel<br>(8-16)/<br><i>Phragmites<br/>australis</i> | 8.0/-270<br>/+88                                                     | 19/8.7                                                  | 1.0/54                                                                         | Nivala et al. [19]/<br>Germany   |

Note: Vertical flow constructed wetland (VFCW); Wastewater type (WT); Domestic (D); Synthetic (S); Personal care products (PCPs); Temperature (T); Hydraulic loading rate (HLR); Operational mode (OM); Intermittently fed (IF); Continuously fed (CF); Organic loading rate (OLR); Chemical oxygen demand (COD); Hydraulic retention time (HRT); System age (SA); Experiment duration (ED); Dissolved oxygen (DO); Oxidation-reduction potential (ORP); Not available (NA); Not removed (NR).

The Population equivalent (PE) is calculated based on the common relation 1 PE = 60 g BOD d<sup>-1</sup>. BOD values were approximated using the ratio COD/BOD = 2 in the studies where BOD was not reported [23,25,26], and COD values were approximated using the ratio COD = 2BOD in the studies where COD was not reported [14,19,21].

**Table S4.** The performance of HCW for personal care products removal.

| Wetland type/Scale/ type of treatment | W T | PCPs                           | Depth (m)/Area (m <sup>2</sup> PE <sup>-1</sup> ) | T (°C) /pH | HLR (m <sup>3</sup> m <sup>-2</sup> d <sup>-1</sup> )/ OM | OLR (g COD m <sup>-2</sup> d <sup>-1</sup> ) | HRT (days) /SA/ED (months) | Filter media (mm)/Plants                                | Effluent DO (mg L <sup>-1</sup> )/ ORP (Inf/Eff) (mV) | Influent/ Effluent conc. (µg L <sup>-1</sup> ) | Removal rate (mg m <sup>-2</sup> d <sup>-1</sup> )/ Removal (%) | Author/ Country                  |
|---------------------------------------|-----|--------------------------------|---------------------------------------------------|------------|-----------------------------------------------------------|----------------------------------------------|----------------------------|---------------------------------------------------------|-------------------------------------------------------|------------------------------------------------|-----------------------------------------------------------------|----------------------------------|
| Full (FWS+FWS) /Secondary             | D   | Triclosan                      | 0.13/NA                                           | 29/6.9     | 0.5/NA                                                    | NA                                           | 0.25/48/ 1.0               | NA/ <i>Acoru</i> , <i>Typha</i> spp.                    | NA/(543 /116)                                         | NA/NA                                          | NA/70                                                           | Park et al. [27]/Korea           |
|                                       | D   | Tris (2-chloroethyl) phosphate | 0.13/NA                                           | 29/6.9     | 0.5/NA                                                    | NA                                           | As above                   | As above                                                | As above                                              | NA/NA                                          | NA/10                                                           |                                  |
| Pilot (H+H+H)/ Secondary              | D   | Tonalide                       | NA/13                                             | 21/7.1     | 0.04/ NA                                                  | 9.3                                          | 3.5/26/0.8                 | 30 cm Gravel (5)/ <i>Phragmites australis</i>           | 5.4/(-97/ +126)                                       | 1.8/0.04                                       | 0.1/98                                                          | Ávila et al. [28]/Spain          |
| Lab (FWS+H) /Secondary                | D   | Methyl dihydro-jasmonate       | 0.5/18                                            | 16/7.3     | 0.05/ CF                                                  | 5.0                                          | 5.1/17/3                   | 25 cm Siliceous gravel (4.0)/ <i>Typha angustifolia</i> | 0.4 (0.5/0.3) /+26/(+9/-55)                           | 4.0/0.7                                        | 0.2/82                                                          | Hijosa-Valsero et al. [3]/ Spain |
|                                       | D   | Galaxolide                     | 0.5/18                                            | 16/7.3     | 0.05/ CF                                                  | 5.0                                          | 5.1/17/3                   | As above                                                | As above                                              | 1.2/0.3                                        | 0.04/75                                                         |                                  |
|                                       | D   | Tonalide                       | 0.5/18                                            | 16/7.3     | 0.05/ CF                                                  | 5.0                                          | 5.1/17/3                   | As above                                                | As above                                              | 0.4/0.1                                        | 0.01/70                                                         |                                  |
| Lab (FWS+H) /Secondary                | D   | Methyl dihydro-jasmonate       | 0.5/18                                            | 17/7.9     | 0.05/ CF                                                  | 5.0                                          | 6.1/17/3                   | 25 cm Siliceous gravel (4.0)/ Unplanted                 | 1.4 (2.4/0.3) /+26/(+25/-118)                         | 4.0/0.8                                        | 0.2/80                                                          | Hijosa-Valsero et al. [3]/ Spain |
|                                       | D   | Galaxolide                     | 0.5/18                                            | 17/7.9     | 0.05/ CF                                                  | 5.0                                          | 6.1/17/3                   | As above                                                | As above                                              | 1.2/0.3                                        | 0.04/75                                                         |                                  |
|                                       | D   | Tonalide                       | 0.5/18                                            | 17/7.9     | 0.05/ CF                                                  | 5.0                                          | 6.1/17/3                   | As above                                                | As above                                              | 0.4/0.1                                        | 0.01/75                                                         |                                  |
| Lab (FWS+H) /Secondary                | D   | Methyl dihydro-jasmonate       | 0.5/6.0                                           | 5.2/7.0    | 0.05/ CF                                                  | 25                                           | 5.1/11/3                   | 25 cm Siliceous gravel (4.0)/ <i>Typha angustifolia</i> | 0.6 (0.7/0.4) /-6/(+15/-16)                           | 12/3.0                                         | 0.4/75                                                          | Hijosa-Valsero et al. [3]/ Spain |

| Wetland type/Scale/<br>type of treatment | W<br>T | PCPs                            | Depth<br>(m)/Area<br>(m <sup>2</sup><br>PE <sup>-1</sup> )           | T<br>(°C)<br>/pH | HLR<br>(m <sup>3</sup> m <sup>-2</sup><br>d <sup>-1</sup> )/<br>OM | OLR<br>(g<br>COD<br>m <sup>-2</sup> d <sup>-1</sup> ) | HRT<br>(days)<br>/SA/ED<br>(months) | Filter media<br>(mm)/Plants                                                                                                                                                                                                                     | Effluent<br>DO<br>(mg L <sup>-1</sup> )/<br>ORP<br>(Inf/Eff)<br>(mV)      | Influent/<br>Effluent<br>conc.<br>(µg L <sup>-1</sup> ) | Removal<br>rate<br>(mg m <sup>-2</sup><br>d <sup>-1</sup> )/<br>Removal<br>(%) | Author/<br>Country                          |
|------------------------------------------|--------|---------------------------------|----------------------------------------------------------------------|------------------|--------------------------------------------------------------------|-------------------------------------------------------|-------------------------------------|-------------------------------------------------------------------------------------------------------------------------------------------------------------------------------------------------------------------------------------------------|---------------------------------------------------------------------------|---------------------------------------------------------|--------------------------------------------------------------------------------|---------------------------------------------|
| Lab (FWS+H)<br>/Secondary                | D      | Galaxolide                      | 0.5/6.0                                                              | 5.2/7.0          | 0.05/<br>CF                                                        | 25                                                    | 5.1/11/3                            | As above                                                                                                                                                                                                                                        | As<br>above                                                               | 0.9/0.3                                                 | 0.03/65                                                                        | Hijosa-<br>Valsero et<br>al. [3]/<br>Spain  |
|                                          | D      | Tonalide                        | 0.5/6.0                                                              | 5.2/7.0          | 0.05/<br>CF                                                        | 25                                                    | 5.1/11/3                            | As above                                                                                                                                                                                                                                        | As<br>above                                                               | 0.4/0.2                                                 | 0.01/60                                                                        |                                             |
|                                          | D      | Methyl<br>dihydro-<br>jasmonate | 0.5/6.0                                                              | 5.1/7.6          | 0.05/<br>CF                                                        | 25                                                    | 6.1/11/3                            | 25 cm<br>Siliceous<br>gravel (4.0)/<br>Unplanted                                                                                                                                                                                                | 2.4<br>(3.5/1.2/<br>-6/(+40/<br>+3)                                       | 12/4.2                                                  | 0.4/65                                                                         |                                             |
|                                          | D      | Galaxolide                      | 0.5/6.0                                                              | 5.1/7.6          | 0.05/<br>CF                                                        | 25                                                    | 6.1/11/3                            | As above                                                                                                                                                                                                                                        | As<br>above                                                               | 0.9/0.5                                                 | 0.02/42                                                                        |                                             |
|                                          | D      | Tonalide                        | 0.5/6.0                                                              | 5.1/7.6          | 0.05/<br>CF                                                        | 25                                                    | 6.1/11/3                            | As above                                                                                                                                                                                                                                        | As<br>above                                                               | 0.4/0.2                                                 | 0.01/52                                                                        |                                             |
| Full<br>(FP+FWS+H)/<br>Secondary         | D      | Methyl<br>dihydro-<br>jasmonate | 1.6 <sup>FP</sup> /<br>0.3 <sup>FWS</sup> /<br>0.5 <sup>H</sup> /5.8 | NA/<br>NA        | 0.02/<br>CF                                                        | 4.0                                                   | 75.9+1.2+<br>5.7/NA/2               | [30 cm Gravel<br>(6-8)] <sup>FWS</sup> /<br><i>Typha latifolia</i><br>[55 cm Gravel<br>(6-8)] <sup>H</sup><br>/Salix<br><i>atrocinerea</i><br>[NA] <sup>FWS</sup> /<br><i>Typha latifolia</i><br>[NA] <sup>H</sup> /Salix<br><i>atrocinerea</i> | (9.0 <sup>FP</sup> /<br>2.0 <sup>FWS</sup> /<br>1.0 <sup>H</sup> )/<br>NA | 12/1.2                                                  | 0.2/90                                                                         | Hijosa-<br>Valsero et<br>al. [29]<br>/Spain |
| Full<br>(FP+FWS+H)/<br>Secondary         | D      | Methyl<br>dihydro-<br>jasmonate | 1.8 <sup>FP</sup> /<br>NA<br>FWS/<br>NA <sup>H</sup> /1.2            | NA/<br>NA        | 0.24/<br>NA                                                        | 33                                                    | 4.2+3.5+<br>3.2/NA/2                | <i>Typha latifolia</i><br>[NA] <sup>H</sup> /Salix<br><i>atrocinerea</i>                                                                                                                                                                        | (3.0 <sup>FP</sup> /<br>3.0 <sup>FWS</sup> /<br>6.0 <sup>H</sup> )/<br>NA | 6.6/0.3                                                 | 1.5/95                                                                         | Hijosa-<br>Valsero et<br>al. [29]<br>/Spain |
| Pilot<br>(H+H+H)/<br>Secondary           | D      | Galaxolide                      | 0.45-0.8/<br>12                                                      | 12/NA            | 0.04/IF                                                            | 9.3                                                   | 3.5/24/0.2                          | 30 cm<br>Siliceous<br>gravel (4.0)/<br><i>Phragmites</i><br><i>australis</i>                                                                                                                                                                    | 3.5/(+12<br>4/-68)                                                        | 1.1/1.9                                                 | NR                                                                             | Hijosa-<br>Valsero et<br>al. [30]<br>/Spain |
|                                          | D      | Tonalide                        | As above                                                             | 12/NA            | 0.04/IF                                                            | 9.3                                                   | 3.5/24/0.2                          | As above                                                                                                                                                                                                                                        | As<br>above                                                               | 0.3/0.6                                                 | NR                                                                             |                                             |



| Wetland type/Scale/<br>type of treatment | W<br>T | PCPs                     | Depth<br>(m)/Area<br>(m <sup>2</sup><br>PE <sup>-1</sup> ) | T<br>(°C)<br>/pH | HLR<br>(m <sup>3</sup> m <sup>-2</sup><br>d <sup>-1</sup> )/<br>OM | OLR<br>(g<br>COD<br>m <sup>-2</sup> d <sup>-1</sup> ) | HRT<br>(days)<br>/SA/ED<br>(months) | Filter media<br>(mm)/Plants                                            | Effluent<br>DO<br>(mg L <sup>-1</sup> )/<br>ORP<br>(Inf/Eff)<br>(mV) | Influent/<br>Effluent<br>conc.<br>(µg L <sup>-1</sup> ) | Removal<br>rate<br>(mg m <sup>-2</sup><br>d <sup>-1</sup> )/<br>Removal<br>(%) | Author/<br>Country                          |
|------------------------------------------|--------|--------------------------|------------------------------------------------------------|------------------|--------------------------------------------------------------------|-------------------------------------------------------|-------------------------------------|------------------------------------------------------------------------|----------------------------------------------------------------------|---------------------------------------------------------|--------------------------------------------------------------------------------|---------------------------------------------|
|                                          | D      | Methyl dihydro-jasmonate | As above                                                   | 12/NA            | 0.04/IF                                                            | 9.3                                                   | 3.5/24/0.2                          | As above                                                               | As above                                                             | 16/5.7                                                  | 0.4/64                                                                         |                                             |
| Pilot<br>(H+H+H)/<br>Secondary           | D      | Galaxolide               | 0.45-0.8/<br>12                                            | 22/NA            | 0.04/IF                                                            | 6.8                                                   | 3.5/24/0.2                          | 30 cm<br>Siliceous<br>gravel (4.0)/<br><i>Phragmites<br/>australis</i> | 0.4/(+12<br>4/+116)                                                  | 1.3/0.2                                                 | 0.04/85                                                                        | Hijosa-<br>Valsero et<br>al. [30]<br>/Spain |
|                                          | D      | Tonalide                 | As above                                                   | 22/NA            | 0.04/IF                                                            | 6.8                                                   | 3.5/24/0.2                          | As above                                                               | As above                                                             | 0.5/0.1                                                 | 0.01/77                                                                        |                                             |
|                                          | D      | Methyl dihydro-jasmonate | As above                                                   | 22/NA            | 0.04/IF                                                            | 6.8                                                   | 3.5/24/0.2                          | As above                                                               | As above                                                             | 21/0.4                                                  | 0.7/98                                                                         |                                             |
| Pilot<br>(H+H+H)/<br>Secondary           | D      | Galaxolide               | 0.45-0.8/<br>12                                            | 11/NA            | 0.04/<br>CF                                                        | 9.3                                                   | 3.5/24/0.2                          | 30 cm<br>Siliceous<br>gravel (4.0)/<br><i>Phragmites<br/>australis</i> | 3.5/(+12<br>4/-106)                                                  | 1.1/2.7                                                 | NR                                                                             | Hijosa-<br>Valsero et<br>al. [30]<br>/Spain |
|                                          | D      | Tonalide                 | As above                                                   | 11/NA            | 0.04/<br>CF                                                        | 9.3                                                   | 3.5/24/0.2                          | As above                                                               | As above                                                             | 0.3/0.9                                                 | NR                                                                             |                                             |
|                                          | D      | Methyl dihydro-jasmonate | As above                                                   | 11/NA            | 0.04/<br>CF                                                        | 9.3                                                   | 3.5/24/0.2                          | As above                                                               | As above                                                             | 16/10                                                   | 0.2/35                                                                         |                                             |
| Pilot<br>(H+H+H)/<br>Secondary           | D      | Galaxolide               | 0.45-0.8/<br>12                                            | 21/NA            | 0.04/<br>CF                                                        | 6.8                                                   | 3.5/24/0.2                          | 30 cm<br>Siliceous<br>gravel (4.0)/<br><i>Phragmites<br/>australis</i> | 0.8/(+12<br>4/+92)                                                   | 1.3/0.2                                                 | 0.04/85                                                                        | Hijosa-<br>Valsero et<br>al. [30]<br>/Spain |
|                                          | D      | Tonalide                 | As above                                                   | 21/NA            | 0.04/<br>CF                                                        | 6.8                                                   | 3.5/24/0.2                          | As above                                                               | As above                                                             | 0.5/0.1                                                 | 0.01/74                                                                        |                                             |

| Wetland type/Scale/<br>type of treatment | W<br>T | PCPs                            | Depth<br>(m)/Area<br>(m <sup>2</sup><br>PE <sup>-1</sup> ) | T<br>(°C)<br>/pH | HLR<br>(m <sup>3</sup> m <sup>-2</sup><br>d <sup>-1</sup> )/<br>OM | OLR<br>(g<br>COD<br>m <sup>-2</sup> d <sup>-1</sup> ) | HRT<br>(days)<br>/SA/ED<br>(months) | Filter media<br>(mm)/Plants                                            | Effluent<br>DO<br>(mg L <sup>-1</sup> )/<br>ORP<br>(Inf/Eff)<br>(mV) | Influent/<br>Effluent<br>conc.<br>(µg L <sup>-1</sup> ) | Removal<br>rate<br>(mg m <sup>-2</sup><br>d <sup>-1</sup> )/<br>Removal<br>(%) | Author/<br>Country                          |
|------------------------------------------|--------|---------------------------------|------------------------------------------------------------|------------------|--------------------------------------------------------------------|-------------------------------------------------------|-------------------------------------|------------------------------------------------------------------------|----------------------------------------------------------------------|---------------------------------------------------------|--------------------------------------------------------------------------------|---------------------------------------------|
| Pilot<br>(H+H+H)/<br>Secondary           | D      | Methyl<br>dihydro-<br>jasmonate | As above                                                   | 21/NA            | 0.04/<br>CF                                                        | 6.8                                                   | 3.5/24/0.2                          | As above                                                               | As<br>above                                                          | 21/0.4                                                  | 0.7/98                                                                         | Hijosa-<br>Valsero et<br>al. [30]<br>/Spain |
|                                          | D      | Galaxolide                      | 0.45-0.8/<br>8.1                                           | 5.7/NA           | 0.04/<br>CF                                                        | 18.6                                                  | 3.5/24/0.2                          | 30 cm<br>Siliceous<br>gravel (4.0)/<br><i>Phragmites<br/>australis</i> | 0.4/(-6.0<br>/-36)                                                   | 0.9/1.1                                                 | NR                                                                             |                                             |
|                                          | D      | Tonalide                        | As above                                                   | 5.7/NA           | 0.04/<br>CF                                                        | 18.6                                                  | 3.5/24/0.2                          | As above                                                               | As<br>above                                                          | 0.4/0.4                                                 | NR                                                                             |                                             |
| Pilot<br>(H+H+H)/<br>Secondary           | D      | Methyl<br>dihydro-<br>jasmonate | As above                                                   | 5.7/NA           | 0.04/<br>CF                                                        | 18.6                                                  | 3.5/24/0.2                          | As above                                                               | As<br>above                                                          | 12/7.1                                                  | 0.2/38                                                                         | Hijosa-<br>Valsero et<br>al. [30]<br>/Spain |
|                                          | D      | Galaxolide                      | 0.45-0.8/<br>24                                            | 17/NA            | 0.04/<br>CF                                                        | 3.8                                                   | 3.5/24/0.2                          | 30 cm<br>Siliceous<br>gravel (4.0)/<br><i>Phragmites<br/>australis</i> | 0.3/(-6.0<br>/-102)                                                  | 1.2/0.9                                                 | 0.01/29                                                                        |                                             |
|                                          | D      | Tonalide                        | As above                                                   | 17/NA            | 0.04/<br>CF                                                        | 3.8                                                   | 3.5/24/0.2                          | As above                                                               | As<br>above                                                          | 0.4/0.2                                                 | 0.005/38                                                                       |                                             |
| Pilot<br>(H+H+H)/<br>Secondary           | D      | Methyl<br>dihydro-<br>jasmonate | As above                                                   | 17/NA            | 0.04/<br>CF                                                        | 3.8                                                   | 3.5/24/0.2                          | As above                                                               | As<br>above                                                          | 4.0/0.1                                                 | 0.1/96                                                                         | Hijosa-<br>Valsero et<br>al. [30]<br>/Spain |
|                                          | D      | Galaxolide                      | 0.45-0.8/<br>8.1                                           | 4.5/NA           | 0.04/<br>CF                                                        | 18.6                                                  | 3.5/24/0.2                          | 30 cm<br>Siliceous<br>gravel (4.0)/<br>Unplanted                       | 0.6/(-6.0<br>/-47)                                                   | 0.9/1.3                                                 | NR                                                                             |                                             |
|                                          | D      | Tonalide                        | As above                                                   | 4.5/NA           | 0.04/<br>CF                                                        | 18.6                                                  | 3.5/24/0.2                          | As above                                                               | As<br>above                                                          | 0.4/0.4                                                 | NR                                                                             |                                             |
|                                          | D      | Methyl<br>dihydro-<br>jasmonate | As above                                                   | 4.5/NA           | 0.04/<br>CF                                                        | 18.6                                                  | 3.5/24/0.2                          | As above                                                               | As<br>above                                                          | 12/7.8                                                  | 0.1/32                                                                         |                                             |

| Wetland type/Scale/<br>type of treatment | W<br>T | PCPs                                  | Depth<br>(m)/Area<br>(m <sup>2</sup><br>PE <sup>-1</sup> ) | T<br>(°C)<br>/pH | HLR<br>(m <sup>3</sup> m <sup>-2</sup><br>d <sup>-1</sup> )/<br>OM | OLR<br>(g<br>COD<br>m <sup>-2</sup> d <sup>-1</sup> ) | HRT<br>(days)<br>/SA/ED<br>(months) | Filter media<br>(mm)/Plants                                                          | Effluent<br>DO<br>(mg L <sup>-1</sup> )/<br>ORP<br>(Inf/Eff)<br>(mV) | Influent/<br>Effluent<br>conc.<br>(µg L <sup>-1</sup> ) | Removal<br>rate<br>(mg m <sup>-2</sup><br>d <sup>-1</sup> )/<br>Removal<br>(%) | Author/<br>Country                          |
|------------------------------------------|--------|---------------------------------------|------------------------------------------------------------|------------------|--------------------------------------------------------------------|-------------------------------------------------------|-------------------------------------|--------------------------------------------------------------------------------------|----------------------------------------------------------------------|---------------------------------------------------------|--------------------------------------------------------------------------------|---------------------------------------------|
| Pilot<br>(H+H+H)/<br>Secondary           | D      | Galaxolide                            | 0.45-0.8/<br>24                                            | 17/NA            | 0.04/<br>CF                                                        | 3.8                                                   | 3.5/24/0.2                          | 30 cm<br>Siliceous<br>gravel (4.0)/<br>Unplanted                                     | 0.2/(-6.0<br>/-64)                                                   | 1.2/1.1                                                 | 0.003/6.6                                                                      | Hijosa-<br>Valsero et<br>al. [30]<br>/Spain |
|                                          | D      | Tonalide                              | As above                                                   | 17/NA            | 0.04/<br>CF                                                        | 3.8                                                   | 3.5/24/0.2                          | As above                                                                             | As<br>above                                                          | 0.4/0.3                                                 | 0.001/8.1                                                                      |                                             |
|                                          | D      | Methyl<br>dihydro-<br>jasmonate       | As above                                                   | 17/NA            | 0.04/<br>CF                                                        | 3.8                                                   | 3.5/24/0.2                          | As above                                                                             | As<br>above                                                          | 4.0/0.6                                                 | 0.1/86                                                                         |                                             |
| Full<br>(P+P+FWS)/<br>Tertiary           | D      | Cashmeran                             | 0.5/0.4                                                    | 16/NA            | 0.2/NA                                                             | NA                                                    | 8.5/132/4                           | NA/<br><i>Phragmites<br/>australis</i> ,<br><i>Typha latifolia</i>                   | 3.3/NA                                                               | 0.2/0.03                                                | 0.02/80                                                                        | Matamoros<br>and<br>Salvadó<br>[31]/Spain   |
|                                          | D      | Celestolide                           | 0.5/0.4                                                    | 16/NA            | 0.2/NA                                                             | NA                                                    | 8.5/132/4                           | As above                                                                             | 3.3/NA                                                               | 0.03/0.01                                               | 0.002/54                                                                       |                                             |
|                                          | D      | Galaxolide                            | 0.5/0.4                                                    | 16/NA            | 0.2/NA                                                             | NA                                                    | 8.5/132/4                           | As above                                                                             | 3.3/NA                                                               | 0.8/0.04                                                | 0.1/95                                                                         |                                             |
|                                          | D      | Tonalide                              | 0.5/0.4                                                    | 16/NA            | 0.2/NA                                                             | NA                                                    | 8.5/132/4                           | As above                                                                             | 3.3/NA                                                               | 0.3/0.04                                                | 0.04/88                                                                        |                                             |
|                                          | D      | Methyl<br>dihydro-<br>jasmonate       | 0.5/0.4                                                    | 16/NA            | 0.2/NA                                                             | NA                                                    | 8.5/132/4                           | As above                                                                             | 3.3/NA                                                               | 0.5/0.2                                                 | 0.05/64                                                                        |                                             |
|                                          | D      | Triclosan                             | 0.5/0.4                                                    | 16/NA            | 0.2/NA                                                             | NA                                                    | 8.5/132/4                           | As above                                                                             | 3.3/NA                                                               | 0.05/0.01                                               | 0.01/86                                                                        |                                             |
|                                          | D      | Oxybenzone                            | 0.5/0.4                                                    | 16/NA            | 0.2/NA                                                             | NA                                                    | 8.5/132/4                           | As above                                                                             | 3.3/NA                                                               | 0.1/0.03                                                | 0.01/77                                                                        |                                             |
|                                          | D      | Tris (2-<br>chloroethyl)<br>phosphate | 0.5/0.4                                                    | 16/NA            | 0.2/NA                                                             | NA                                                    | 8.5/132/4                           | As above                                                                             | 3.3/NA                                                               | 0.22/0.16                                               | 0.01/27                                                                        |                                             |
|                                          | D      | Tributyl<br>phosphate                 | 0.5/0.4                                                    | 16/NA            | 0.2/NA                                                             | NA                                                    | 8.5/132/4                           | As above                                                                             | 3.3/NA                                                               | 0.06/0.02                                               | 0.01/60                                                                        |                                             |
|                                          | D      | Methyl<br>dihydro-<br>jasmonate       | 0.5/18                                                     | 16/7.4           | 0.05/<br>CF                                                        | 6.0                                                   | 1/36/9                              | [25 cm<br>Siliceous<br>gravel (4.0)] <sup>H</sup><br>/ <i>Typha<br/>angustifolia</i> | 1.0<br>(1.4/0.6)<br>/+2.7/<br>(+60/<br>-15)                          | 5.8/0.6                                                 | 0.3/89                                                                         |                                             |
| Lab (FWS+H)<br>/Secondary                |        |                                       |                                                            |                  |                                                                    |                                                       |                                     |                                                                                      |                                                                      |                                                         |                                                                                | Reyes-<br>Contreras<br>et al. [4]<br>/Spain |

| Wetland type/Scale/<br>type of treatment | W<br>T | PCPs                            | Depth<br>(m)/Area<br>(m <sup>2</sup><br>PE <sup>-1</sup> ) | T<br>(°C)<br>/pH | HLR<br>(m <sup>3</sup> m <sup>-2</sup><br>d <sup>-1</sup> )/<br>OM | OLR<br>(g<br>COD<br>m <sup>-2</sup> d <sup>-1</sup> ) | HRT<br>(days)<br>/SA/ED<br>(months) | Filter media<br>(mm)/Plants                                                                            | Effluent<br>DO<br>(mg L <sup>-1</sup> )/<br>ORP<br>(Inf/Eff)<br>(mV) | Influent/<br>Effluent<br>conc.<br>(µg L <sup>-1</sup> ) | Removal<br>rate<br>(mg m <sup>-2</sup><br>d <sup>-1</sup> )/<br>Removal<br>(%) | Author/<br>Country                          |
|------------------------------------------|--------|---------------------------------|------------------------------------------------------------|------------------|--------------------------------------------------------------------|-------------------------------------------------------|-------------------------------------|--------------------------------------------------------------------------------------------------------|----------------------------------------------------------------------|---------------------------------------------------------|--------------------------------------------------------------------------------|---------------------------------------------|
| Lab <sup>(FWS+H)</sup><br>/Secondary     | D      | Galaxolide                      | 0.5/18                                                     | 16/7.4           | 0.05/<br>CF                                                        | 6.0                                                   | 1/36/9                              | As above                                                                                               | As<br>above                                                          | 2.1/0.5                                                 | 0.08/76                                                                        | Reyes-<br>Contreras<br>et al. [4]<br>/Spain |
|                                          | D      | Tonalide                        | 0.5/18                                                     | 16/7.4           | 0.05/<br>CF                                                        | 6.0                                                   | 1/36/9                              | As above                                                                                               | As<br>above                                                          | 0.4/0.1                                                 | 0.01/67                                                                        |                                             |
|                                          | D      | Methyl<br>dihydro-<br>jasmonate | 0.5/8.4                                                    | 5.2/7.0          | 0.05/<br>CF                                                        | 17                                                    | 1/30/6                              | [25 cm<br>Siliceous<br>gravel (4.0)] <sup>H</sup><br>/ <i>Typha</i><br><i>angustifolia</i><br>As above | 0.8<br>(1.1/0.5)<br>/-41/<br>(+15/<br>-74)                           | 6.6/1.8                                                 | 0.2/72                                                                         |                                             |
|                                          | D      | Galaxolide                      | 0.5/8.4                                                    | 5.2/7.0          | 0.05/<br>CF                                                        | 17                                                    | 1/30/6                              | As above                                                                                               | As<br>above                                                          | 1.5/0.5                                                 | 0.05/68                                                                        |                                             |
|                                          | D      | Tonalide                        | 0.5/8.4                                                    | 5.2/7.0          | 0.05/<br>CF                                                        | 17                                                    | 1/30/6                              | As above                                                                                               | As<br>above                                                          | 0.3/0.1                                                 | 0.01/66                                                                        |                                             |
| Lab <sup>(FWS+H)</sup><br>/Secondary     | D      | Methyl<br>dihydro-<br>jasmonate | 0.5/18                                                     | 18/7.9           | 0.05/<br>CF                                                        | 6.0                                                   | 0.6/36/9                            | [25 cm<br>Siliceous<br>gravel (4.0)] <sup>H</sup><br>/Unplanted                                        | 2.6<br>(4.6/0.5)<br>/+2.7/<br>(+91/-<br>79)                          | 5.8/1.0                                                 | 0.2/82                                                                         | Reyes-<br>Contreras<br>et al. [4]<br>/Spain |
|                                          | D      | Galaxolide                      | 0.5/18                                                     | 18/7.9           | 0.05/<br>CF                                                        | 6.0                                                   | 0.6/36/9                            | As above                                                                                               | As<br>above                                                          | 2.1/0.7                                                 | 0.07/69                                                                        |                                             |
|                                          | D      | Tonalide                        | 0.5/18                                                     | 18/7.9           | 0.05/<br>CF                                                        | 6.0                                                   | 0.6/36/9                            | As above                                                                                               | As<br>above                                                          | 0.4/0.2                                                 | 0.01/62                                                                        |                                             |
|                                          | D      | Methyl<br>dihydro-<br>jasmonate | 0.5/8.4                                                    | 5.1/7.7          | 0.05/<br>CF                                                        | 17                                                    | 0.6/30/6                            | [25 cm<br>Siliceous<br>gravel (4.0)] <sup>H</sup> /<br>Unplanted                                       | 1.7<br>(2.6/0.9)<br>/-41/<br>(+36/<br>-40)                           | 6.6/1.9                                                 | 0.2/71                                                                         |                                             |
|                                          | D      | Galaxolide                      | 0.5/8.4                                                    | 5.1/7.7          | 0.05/<br>CF                                                        | 17                                                    | 0.6/30/6                            | As above                                                                                               | As<br>above                                                          | 1.5/0.7                                                 | 0.04/52                                                                        |                                             |
|                                          | D      | Tonalide                        | 0.5/8.4                                                    | 5.1/7.7          | 0.05/<br>CF                                                        | 17                                                    | 0.6/30/6                            | As above                                                                                               | As<br>above                                                          | 0.3/0.1                                                 | 0.01/61                                                                        |                                             |

| Wetland type/Scale/ type of treatment | W T | PCPs                              | Depth (m)/Area (m <sup>2</sup> PE <sup>-1</sup> ) | T (°C) /pH | HLR (m <sup>3</sup> m <sup>-2</sup> d <sup>-1</sup> )/ OM | OLR (g COD m <sup>-2</sup> d <sup>-1</sup> ) | HRT (days) /SA/ED (months) | Filter media (mm)/Plants                                                                                                                                                                                                                                                                                                                                   | Effluent DO (mg L <sup>-1</sup> )/ ORP (Inf/Eff) (mV) | Influent/ Effluent conc. (µg L <sup>-1</sup> ) | Removal rate (mg m <sup>-2</sup> d <sup>-1</sup> )/ Removal (%) | Author/ Country          |
|---------------------------------------|-----|-----------------------------------|---------------------------------------------------|------------|-----------------------------------------------------------|----------------------------------------------|----------------------------|------------------------------------------------------------------------------------------------------------------------------------------------------------------------------------------------------------------------------------------------------------------------------------------------------------------------------------------------------------|-------------------------------------------------------|------------------------------------------------|-----------------------------------------------------------------|--------------------------|
| Pilot (H+H+H)/ Secondary              | D   | Tonalide                          | 0.45-0.5/10                                       | 14/6.9     | 0.04/ CF                                                  | 12                                           | 3.5/34/0.9                 | 30 cm Gravel (7.3)/ <i>Phragmites australis</i>                                                                                                                                                                                                                                                                                                            | NA/ (-196/-96)                                        | 3.4/0.4                                        | 0.1/88                                                          | Ávila et al. [32]/Spain  |
|                                       | D   | Oxybenzone                        | 0.45-0.5/10                                       | 14/6.9     | 0.04/ CF                                                  | 12                                           | 3.5/34/0.9                 | As above                                                                                                                                                                                                                                                                                                                                                   | As above                                              | 8.3/1.1                                        | 0.3/87                                                          |                          |
| Pilot (H+H+H)/ Secondary              | D   | Tonalide                          | 0.45-0.5/12                                       | 14/6.9     | 0.04/IF                                                   | 10                                           | 3.5/34/0.9                 | As above                                                                                                                                                                                                                                                                                                                                                   | NA/ (-87/-11)                                         | 3.4/0.3                                        | 0.1/91                                                          | Ávila et al. [32]/Spain  |
|                                       | D   | Oxybenzone                        | 0.45-0.5/12                                       | 14/6.9     | 0.04/IF                                                   | 10                                           | 3.5/34/0.9                 | As above                                                                                                                                                                                                                                                                                                                                                   | As above                                              | 8.2/0.4                                        | 0.3/95                                                          |                          |
| Full (H+H+FWS)/ Tertiary              | D   | N,N-diethyl-3-methyl benzoylamide | NA/NA                                             | NA/ NA     | 0.8/CF                                                    | NA                                           | 1.6/NA/2                   | NA/[ <i>Cyperus alternifolius</i> , <i>Thalia dealbata</i> ] <sup>H</sup> , [ <i>Thalia dealbata</i> , <i>Canna lily</i> , <i>Iris pseudacorus</i> , <i>Herba Saururi Chinensis</i> , <i>Oenanthe javanica</i> ] <sup>H</sup> , [ <i>Nymphaea alba</i> , <i>Herba Saururi Chinensis</i> , <i>Pontederia cordata</i> , <i>Iris tectorum</i> , <i>Thalia</i> | NA/NA                                                 | 0.05/0.07                                      | NR                                                              | Zhu and Chen [33]/ China |

| Wetland type/Scale/ type of treatment | W T | PCPs         | Depth (m)/Area (m <sup>2</sup> PE <sup>-1</sup> ) | T (°C) /pH | HLR (m <sup>3</sup> m <sup>-2</sup> d <sup>-1</sup> )/ OM | OLR (g COD m <sup>-2</sup> d <sup>-1</sup> ) | HRT (days) /SA/ED (months) | Filter media (mm)/Plants                                                                                                                                                                   | Effluent DO (mg L <sup>-1</sup> )/ ORP (Inf/Eff) (mV)                    | Influent/ Effluent conc. (µg L <sup>-1</sup> ) | Removal rate (mg m <sup>-2</sup> d <sup>-1</sup> )/ Removal (%) | Author/ Country         |
|---------------------------------------|-----|--------------|---------------------------------------------------|------------|-----------------------------------------------------------|----------------------------------------------|----------------------------|--------------------------------------------------------------------------------------------------------------------------------------------------------------------------------------------|--------------------------------------------------------------------------|------------------------------------------------|-----------------------------------------------------------------|-------------------------|
| Pilot (V+V+H+FWS)/ Secondary          | D   | Triclocarban | NA/NA                                             | NA/ NA     | 0.8/CF                                                    | NA                                           | 1.6/NA/2                   | <i>dealbata</i> ,<br><i>Hydrocotyle verticillata</i> ,<br><i>Phragmites australis</i> ] <sup>FWS</sup><br>As above                                                                         | NA/NA                                                                    | 0.008/ 0.01                                    | NR                                                              | Ávila et al. [34]/Spain |
|                                       | D   | Tonalide     | NA/2.7                                            | 14/7.8     | 0.06/IF                                                   | 37                                           | 4/12/1.4                   | [10 cm Sand (1-2) Gravel (3-8)] <sup>V</sup><br>[30 cm Gravel (4-12) Inlet & outlet, Stones (30-50)] <sup>H</sup><br>[10 cm Gravel (4-12)] <sup>FWS</sup> /<br><i>Phragmites australis</i> | (3.6 <sup>V</sup> / 0.6 <sup>H</sup> / 5.9 <sup>FWS</sup> )/ (-88/+171)  | NA/NA                                          | NA/95                                                           |                         |
|                                       | D   | Oxybenzone   | NA/2.7                                            | 14/7.8     | 0.06/IF                                                   | 37                                           | 4/12/1.4                   | As above                                                                                                                                                                                   | As above                                                                 | NA/NA                                          | NA/96                                                           |                         |
|                                       | D   | Triclosan    | NA/2.7                                            | 14/7.8     | 0.06/IF                                                   | 37                                           | 4/12/1.4                   | As above                                                                                                                                                                                   | As above                                                                 | NA/NA                                          | NA/96                                                           |                         |
| Pilot (V+V+H+FWS)/ Secondary          | D   | Tonalide     | NA/0.9                                            | 16/8.0     | 0.13/IF                                                   | 110                                          | 2/12/1.4                   | As above                                                                                                                                                                                   | (3.2 <sup>V</sup> / 0.4 <sup>H</sup> / 5.2 <sup>FWS</sup> )/ (-139/+158) | NA/NA                                          | NA/85                                                           | Ávila et al. [34]/Spain |
|                                       | D   | Oxybenzone   | NA/0.9                                            | 16/8.0     | 0.13/IF                                                   | 110                                          | 2/12/1.4                   | As above                                                                                                                                                                                   | As above                                                                 | NA/NA                                          | NA/92                                                           |                         |
|                                       | D   | Triclosan    | NA/0.9                                            | 16/8.0     | 0.13/IF                                                   | 110                                          | 2/12/1.4                   | As above                                                                                                                                                                                   | As above                                                                 | NA/NA                                          | NA/92                                                           |                         |

| Wetland type/Scale/ type of treatment | W T | PCPs       | Depth (m)/Area (m <sup>2</sup> PE <sup>-1</sup> )            | T (°C) /pH | HLR (m <sup>3</sup> m <sup>-2</sup> d <sup>-1</sup> )/ OM | OLR (g COD m <sup>-2</sup> d <sup>-1</sup> ) | HRT (days) /SA/ED (months) | Filter media (mm)/Plants                                                                                                                                                                                                                                                       | Effluent DO (mg L <sup>-1</sup> )/ ORP (Inf/Eff) (mV)                     | Influent/ Effluent conc. (µg L <sup>-1</sup> ) | Removal rate (mg m <sup>-2</sup> d <sup>-1</sup> )/ Removal (%) | Author/ Country         |
|---------------------------------------|-----|------------|--------------------------------------------------------------|------------|-----------------------------------------------------------|----------------------------------------------|----------------------------|--------------------------------------------------------------------------------------------------------------------------------------------------------------------------------------------------------------------------------------------------------------------------------|---------------------------------------------------------------------------|------------------------------------------------|-----------------------------------------------------------------|-------------------------|
| Pilot (V+V+H+FWS)/ Secondary          | D   | Tonalide   | NA/0.6                                                       | 18/7.6     | 0.18/IF                                                   | 159                                          | 1.5/12/1.4                 | As above                                                                                                                                                                                                                                                                       | (2.7 <sup>V</sup> / 0.3 <sup>H</sup> / 3.7 <sup>FWS</sup> )/ (-168/ +156) | NA/NA                                          | NA/85                                                           | Ávila et al. [34]/Spain |
|                                       | D   | Oxybenzone | NA/0.6                                                       | 18/7.6     | 0.18/IF                                                   | 159                                          | 1.5/12/1.4                 | As above                                                                                                                                                                                                                                                                       | As above                                                                  | NA/NA                                          | NA/95                                                           |                         |
|                                       | D   | Triclosan  | NA/0.6                                                       | 18/7.6     | 0.18/IF                                                   | 159                                          | 1.5/12/1.4                 | As above                                                                                                                                                                                                                                                                       | As above                                                                  | NA/NA                                          | NA/85                                                           |                         |
| Full (V+H+FWS)/ Secondary             | D   | Tonalide   | 0.8 <sup>V</sup> / 0.4 <sup>H</sup> / 0.3 <sup>FWS</sup> /11 | 20/7.8     | 0.04/IF                                                   | 11                                           | 7.4/54/ NA                 | [5 cm Sand (1-2) 60 cm Siliceous gravel (4-12) 15 cm Siliceous gravel (25-40)] <sup>V</sup> / <i>Phragmites australis</i> [40 cm Siliceous gravel (4-12) Inlet & outlet, Stones (40-80)] <sup>H</sup> / <i>Phragmites australis</i> [20 cm Siliceous gravel)] <sup>FWS</sup> / | (2.0 <sup>V</sup> / 4.2 <sup>H</sup> / 2.7 <sup>FWS</sup> )/ (+2/ +129)   | 0.3/0.02                                       | 0.01/94                                                         | Ávila et al. [35]/Spain |

| Wetland type/Scale/ type of treatment | W T | PCPs                           | Depth (m)/Area (m <sup>2</sup> PE <sup>-1</sup> ) | T (°C) /pH | HLR (m <sup>3</sup> m <sup>-2</sup> d <sup>-1</sup> )/ OM | OLR (g COD m <sup>-2</sup> d <sup>-1</sup> ) | HRT (days) /SA/ED (months) | Filter media (mm)/Plants                                                                                                                                         | Effluent DO (mg L <sup>-1</sup> )/ ORP (Inf/Eff) (mV) | Influent/ Effluent conc. (µg L <sup>-1</sup> ) | Removal rate (mg m <sup>-2</sup> d <sup>-1</sup> )/ Removal (%) | Author/ Country              |
|---------------------------------------|-----|--------------------------------|---------------------------------------------------|------------|-----------------------------------------------------------|----------------------------------------------|----------------------------|------------------------------------------------------------------------------------------------------------------------------------------------------------------|-------------------------------------------------------|------------------------------------------------|-----------------------------------------------------------------|------------------------------|
|                                       |     |                                |                                                   |            |                                                           |                                              |                            | <i>Typha</i> spp.,<br><i>Scirpus</i> spp., <i>Iris</i> <i>pseudacorus</i> ,<br><i>Carex flacca</i> ,<br><i>Cyperus</i> <i>rutundus</i> and<br><i>Juncus</i> spp. |                                                       |                                                |                                                                 |                              |
| Full (H+H)/ Secondary                 | D   | Triclosan                      | As above /11                                      | 20/7.8     | 0.04/IF                                                   | 11                                           | 7.4/54/ NA                 | As above                                                                                                                                                         | As above                                              | 0.1/0.03                                       | 0.004/77                                                        | Matamoros et al. [36]/ Spain |
|                                       | D   | Methyl dihydro-jasmonate       | 0.5/3.6                                           | 21/NA      | 0.1/IF                                                    | 33                                           | 5/120/1                    | NA/<br><i>Phragmites australis</i>                                                                                                                               | 0.9/NA                                                | NA/NA                                          | NA/93                                                           |                              |
|                                       | D   | Galaxolide                     | 0.5/3.6                                           | 21/NA      | 0.1/IF                                                    | 33                                           | 5/120/1                    | As above                                                                                                                                                         | 0.9/NA                                                | NA/NA                                          | NA/75                                                           |                              |
|                                       | D   | Oxybenzone                     | 0.5/3.6                                           | 21/NA      | 0.1/IF                                                    | 33                                           | 5/120/1                    | As above                                                                                                                                                         | 0.9/NA                                                | NA/NA                                          | NA/78                                                           |                              |
|                                       | D   | Tonalide                       | 0.5/3.6                                           | 21/NA      | 0.1/IF                                                    | 33                                           | 5/120/1                    | As above                                                                                                                                                         | 0.9/NA                                                | NA/NA                                          | NA/73                                                           |                              |
|                                       | D   | Methylparaben                  | 0.5/3.6                                           | 21/NA      | 0.1/IF                                                    | 33                                           | 5/120/1                    | As above                                                                                                                                                         | 0.9/NA                                                | NA/NA                                          | NA/56                                                           |                              |
|                                       | D   | Tributyl phosphate             | 0.5/3.6                                           | 21/NA      | 0.1/IF                                                    | 33                                           | 5/120/1                    | As above                                                                                                                                                         | 0.9/NA                                                | NA/NA                                          | NA/37                                                           |                              |
|                                       | D   | Triclosan                      | 0.5/3.6                                           | 21/NA      | 0.1/IF                                                    | 33                                           | 5/120/1                    | As above                                                                                                                                                         | 0.9/NA                                                | NA/NA                                          | NA/35                                                           |                              |
|                                       | D   | Cashmeran                      | 0.5/3.6                                           | 21/NA      | 0.1/IF                                                    | 33                                           | 5/120/1                    | As above                                                                                                                                                         | 0.9/NA                                                | NA/NA                                          | NA/39                                                           |                              |
|                                       | D   | Triphenyl phosphate            | 0.5/3.6                                           | 21/NA      | 0.1/IF                                                    | 33                                           | 5/120/1                    | As above                                                                                                                                                         | 0.9/NA                                                | NA/NA                                          | NA/67                                                           |                              |
| Full (H+H)/ Secondary                 | D   | Tris (2-chloroethyl) phosphate | 0.5/3.6                                           | 21/NA      | 0.1/IF                                                    | 33                                           | 5/120/1                    | As above                                                                                                                                                         | 0.9/NA                                                | NA/NA                                          | NA/24                                                           | Matamoros et al. [36]/ Spain |
|                                       | D   | Methyl dihydro-jasmonate       | 0.5/4.8                                           | 10/NA      | 0.1/IF                                                    | 24                                           | 5/120/1                    | As above                                                                                                                                                         | 1.2/NA                                                | NA/NA                                          | NA/79                                                           |                              |
|                                       | D   | Galaxolide                     | 0.5/4.8                                           | 10/NA      | 0.1/IF                                                    | 24                                           | 5/120/1                    | As above                                                                                                                                                         | 1.2/NA                                                | NA/NA                                          | NA/79                                                           |                              |



| Wetland type/Scale/<br>type of treatment | W<br>T | PCPs                                  | Depth<br>(m)/Area<br>(m <sup>2</sup><br>PE <sup>-1</sup> ) | T<br>(°C)<br>/pH | HLR<br>(m <sup>3</sup> m <sup>-2</sup><br>d <sup>-1</sup> )/<br>OM | OLR<br>(g<br>COD<br>m <sup>-2</sup> d <sup>-1</sup> ) | HRT<br>(days)<br>/SA/ED<br>(months) | Filter media<br>(mm)/Plants                                                                | Effluent<br>DO<br>(mg L <sup>-1</sup> )/<br>ORP<br>(Inf/Eff)<br>(mV) | Influent/<br>Effluent<br>conc.<br>(µg L <sup>-1</sup> ) | Removal<br>rate<br>(mg m <sup>-2</sup><br>d <sup>-1</sup> )/<br>Removal<br>(%) | Author/<br>Country                         |
|------------------------------------------|--------|---------------------------------------|------------------------------------------------------------|------------------|--------------------------------------------------------------------|-------------------------------------------------------|-------------------------------------|--------------------------------------------------------------------------------------------|----------------------------------------------------------------------|---------------------------------------------------------|--------------------------------------------------------------------------------|--------------------------------------------|
| Lab (FWS+H)<br>/Secondary                | D      | Oxybenzone                            | 0.5/4.8                                                    | 10/NA            | 0.1/IF                                                             | 24                                                    | 5/120/1                             | As above                                                                                   | 1.2/NA                                                               | NA/NA                                                   | NA/87                                                                          | Hijosa-<br>Valsero et<br>al. [5]/<br>Spain |
|                                          | D      | Tonalide                              | 0.5/4.8                                                    | 10/NA            | 0.1/IF                                                             | 24                                                    | 5/120/1                             | As above                                                                                   | 1.2/NA                                                               | NA/NA                                                   | NA/83                                                                          |                                            |
|                                          | D      | Methylparaben                         | 0.5/4.8                                                    | 10/NA            | 0.1/IF                                                             | 24                                                    | 5/120/1                             | As above                                                                                   | 1.2/NA                                                               | NA/NA                                                   | NA/33                                                                          |                                            |
|                                          | D      | Tributyl<br>phosphate                 | 0.5/4.8                                                    | 10/NA            | 0.1/IF                                                             | 24                                                    | 5/120/1                             | As above                                                                                   | 1.2/NA                                                               | NA/NA                                                   | NA/32                                                                          |                                            |
|                                          | D      | Triclosan                             | 0.5/4.8                                                    | 10/NA            | 0.1/IF                                                             | 24                                                    | 5/120/1                             | As above                                                                                   | 1.2/NA                                                               | NA/NA                                                   | NA/45                                                                          |                                            |
|                                          | D      | Cashmeran                             | 0.5/4.8                                                    | 10/NA            | 0.1/IF                                                             | 24                                                    | 5/120/1                             | As above                                                                                   | 1.2/NA                                                               | NA/NA                                                   | NA/50                                                                          |                                            |
|                                          | D      | Triphenyl<br>phosphate                | 0.5/4.8                                                    | 10/NA            | 0.1/IF                                                             | 24                                                    | 5/120/1                             | As above                                                                                   | 1.2/NA                                                               | NA/NA                                                   | NA/38                                                                          |                                            |
|                                          | D      | Tris (2-<br>chloroethyl)<br>phosphate | 0.5/4.8                                                    | 10/NA            | 0.1/IF                                                             | 24                                                    | 5/120/1                             | As above                                                                                   | 1.2/NA                                                               | NA/NA                                                   | NA/7.0                                                                         |                                            |
|                                          | D      | Methyl<br>dihydro-<br>jasmonate       | 0.5/20                                                     | 19/6.7           | 0.05/<br>CF                                                        | 6.0                                                   | 1.6/36/3                            | [25 cm<br>Siliceous<br>gravel (4.0)] <sup>H</sup> /<br><i>Typha</i><br><i>angustifolia</i> | (0.2 <sup>FWS</sup> /<br>0.2 <sup>H</sup> )/<br>(-100/<br>-134)      | 7.3/0.9                                                 | 0.3/87                                                                         |                                            |
|                                          | D      | Galaxolide                            | 0.5/20                                                     | 19/6.7           | 0.05/<br>CF                                                        | 6.0                                                   | 1.6/36/3                            | As above                                                                                   | As<br>above                                                          | 3.8/1.2                                                 | 0.1/68                                                                         |                                            |
| Lab (FWS+H)<br>/Secondary                | D      | Tonalide                              | 0.5/20                                                     | 19/6.7           | 0.05/<br>CF                                                        | 6.0                                                   | 1.6/36/3                            | As above                                                                                   | As<br>above                                                          | 0.3/0.1                                                 | 0.01/64                                                                        | Hijosa-<br>Valsero et<br>al. [5]/<br>Spain |
|                                          | D      | Methyl<br>dihydro-<br>jasmonate       | 0.5/20                                                     | 18/7.4           | 0.05/<br>CF                                                        | 6.0                                                   | 2.3/36/3                            | [25 cm<br>Siliceous<br>gravel (4.0)] <sup>H</sup> /<br>Unplanted                           | (0.3 <sup>FWS</sup> /<br>0.1 <sup>H</sup> )/<br>(-100/<br>-132)      | 7.3/1.0                                                 | 0.3/86                                                                         |                                            |
|                                          | D      | Galaxolide                            | 0.5/20                                                     | 18/7.4           | 0.05/<br>CF                                                        | 6.0                                                   | 2.3/36/3                            | As above                                                                                   | As<br>above                                                          | 3.8/1.4                                                 | 0.1/64                                                                         |                                            |
|                                          | D      | Tonalide                              | 0.5/20                                                     | 18/7.4           | 0.05/<br>CF                                                        | 6.0                                                   | 2.3/36/3                            | As above                                                                                   | As<br>above                                                          | 0.3/0.1                                                 | 0.01/64                                                                        |                                            |
| Full (V+H)/<br>Tertiary**                | D      | Triclosan                             | 0.7 <sup>V</sup> /<br>0.8 <sup>H</sup> /17                 | 25.8/<br>6.7     | 0.5/IF                                                             | 7.2                                                   | 1/9/2                               | [Gravel<br>(10-30)<br>Gravel                                                               | 3.1/NA                                                               | 0.2/0.03                                                | 0.1/84                                                                         | Dai et al.<br>[37]/China                   |

| Wetland type/Scale/ type of treatment | W T | PCPs       | Depth (m)/Area (m <sup>2</sup> PE <sup>-1</sup> ) | T (°C) /pH   | HLR (m <sup>3</sup> m <sup>-2</sup> d <sup>-1</sup> )/ OM | OLR (g COD m <sup>-2</sup> d <sup>-1</sup> ) | HRT (days) /SA/ED (months) | Filter media (mm)/Plants                                                                                                                                                                                                                                                                           | Effluent DO (mg L <sup>-1</sup> )/ ORP (Inf/Eff) (mV) | Influent/ Effluent conc. (µg L <sup>-1</sup> ) | Removal rate (mg m <sup>-2</sup> d <sup>-1</sup> )/ Removal (%) | Author/ Country               |
|---------------------------------------|-----|------------|---------------------------------------------------|--------------|-----------------------------------------------------------|----------------------------------------------|----------------------------|----------------------------------------------------------------------------------------------------------------------------------------------------------------------------------------------------------------------------------------------------------------------------------------------------|-------------------------------------------------------|------------------------------------------------|-----------------------------------------------------------------|-------------------------------|
|                                       |     |            |                                                   |              |                                                           |                                              |                            | (30-50)] <sup>V+H</sup> /<br>[ <i>Canna glauca</i> ,<br><i>Thalia dealbata</i> ,<br><i>Canna indica</i> ,<br><i>Typha angustifolia</i> ] <sup>V</sup><br>[ <i>Cyperus alternifolius</i> ,<br><i>Arundo donax</i> ,<br><i>Acorus tatarinowii</i> ,<br><i>Desmodium styracifolium</i> ] <sup>H</sup> |                                                       |                                                |                                                                 |                               |
| Full (V+H)/ Tertiary**                | D   | Triclosan  | 0.7 <sup>V</sup> /<br>0.8 <sup>H</sup> /8.4       | 25.8/<br>6.7 | 1.0/IF                                                    | 14                                           | 0.5/9/2                    | As above                                                                                                                                                                                                                                                                                           | 3.1/NA                                                | 0.2/0.03                                       | 0.2/84                                                          | Dai et al. [37]/China         |
| Full (V+H)/ Tertiary**                | D   | Triclosan  | 0.7 <sup>V</sup> /<br>0.8 <sup>H</sup> /5.6       | 25.8/<br>6.7 | 1.5/IF                                                    | 21                                           | 0.3/9/2                    | As above                                                                                                                                                                                                                                                                                           | 3.1/NA                                                | 0.2/0.03                                       | 0.2/84                                                          | Dai et al. [37]/China         |
| Full (V+H)/ Tertiary**                | D   | Triclosan  | 0.7 <sup>V</sup> /<br>0.8 <sup>H</sup> /4.2       | 25.8/<br>6.7 | 2.0/IF                                                    | 29                                           | 0.25/9/2                   | As above                                                                                                                                                                                                                                                                                           | 3.1/NA                                                | 0.2/0.03                                       | 0.3/84                                                          | Dai et al. [37]/China         |
| Pilot (V+V)/ Secondary                | D   | Acesulfame | (0.85 <sup>VG</sup> /<br>0.85 <sup>VS</sup> )/4.1 | 21/NA        | 0.05/IF                                                   | 29                                           | NA/60/12                   | Gravel (4-8) <sup>VG</sup><br>Sand (1-3) <sup>VS</sup> /<br><i>Phragmites australis</i>                                                                                                                                                                                                            | 10/<br>(-277/<br>+216)                                | 19/10                                          | 0.4/47                                                          | Kahl et al. [14]/ Germany     |
| Full (V+V+H+FWS)/ Secondary           | H   | Triclosan  | NA/NA                                             | NA/7.6       | 0.02/<br>NA                                               | 2.1                                          | 10/12/12                   | [60 cm Fluviatile sand] <sup>V</sup> [25 cm Fluviatile sand] <sup>H</sup> /<br><i>Phragmites australis</i> ,                                                                                                                                                                                       | NA/NA                                                 | 0.2/0.1                                        | 0.002/50                                                        | Vystavna et al. [38]/ Ukraine |

| Wetland type/Scale/ type of treatment | W T | PCPs                           | Depth (m)/Area (m <sup>2</sup> PE <sup>-1</sup> )              | T (°C) /pH | HLR (m <sup>3</sup> m <sup>-2</sup> d <sup>-1</sup> )/ OM | OLR (g COD m <sup>-2</sup> d <sup>-1</sup> ) | HRT (days) /SA/ED (months) | Filter media (mm)/Plants                                                                                                                            | Effluent DO (mg L <sup>-1</sup> )/ ORP (Inf/Eff) (mV)                  | Influent/ Effluent conc. (µg L <sup>-1</sup> ) | Removal rate (mg m <sup>-2</sup> d <sup>-1</sup> )/ Removal (%) | Author/ Country               |
|---------------------------------------|-----|--------------------------------|----------------------------------------------------------------|------------|-----------------------------------------------------------|----------------------------------------------|----------------------------|-----------------------------------------------------------------------------------------------------------------------------------------------------|------------------------------------------------------------------------|------------------------------------------------|-----------------------------------------------------------------|-------------------------------|
| Full (V+V+H+FWS)/ Secondary           | H   | Triclosan                      | NA/NA                                                          | NA/7.7     | 0.03/ NA                                                  | 4.4                                          | 13/48/12                   | <i>Typha latifolia</i> L., <i>Scirpus sylvaticus</i> L.<br>As above                                                                                 | NA/NA                                                                  | 0.3/0.01                                       | 0.008/97                                                        | Vystavna et al. [38]/ Ukraine |
| Pilot (V+H+FWS)/ Secondary            | D   | N,N-diethyl-meta-toluamide     | 0.8 <sup>V</sup> / 0.3 <sup>H</sup> / 0.5 <sup>FWS</sup> / 1.6 | 20/7.4     | 0.1/IF                                                    | 40                                           | NA/76/4                    | [10 cm Sand (1-2) 70 cm Gravel (3-8)] <sup>V</sup> [30 cm Gravel (4-12) Inlet and outlet: Stone (30-50)] <sup>H</sup> / <i>Phragmites australis</i> | (2.1 <sup>V</sup> / 2.2 <sup>H</sup> / 0.8 <sup>FWS</sup> )/ (+33/+69) | 2.4/0.5                                        | 0.3/80                                                          | Sgroi et al. [24]/Spain       |
|                                       | D   | Sucralose                      | As above/ 1.6                                                  | 20/7.4     | 0.1/IF                                                    | 40                                           | NA/76/4                    | As above                                                                                                                                            | As above                                                               | 13.1/13.3                                      | NR                                                              |                               |
| Full (FWS+V+V+FWS+ FWS+SL)/ Primary   | *   | N,N-diethyl-3-methyl benzamide | NA/ 6.5                                                        | NA/8.0     | 0.22/ CF                                                  | 26                                           | 1.5/NA/ 12                 | NA/ <i>Myriophyllum verticillatum</i> L., <i>Pontederia cordata</i>                                                                                 | NA/NA                                                                  | 0.5/0.01                                       | 0.1/97                                                          | Chen et al. [39]/China        |
|                                       | *   | Triclosan                      | NA/ 6.5                                                        | NA/8.0     | 0.22/ CF                                                  | 26                                           | 1.5/NA/ 12                 | As above                                                                                                                                            |                                                                        | 0.2/0.04                                       | 0.03/81                                                         |                               |
|                                       | *   | Carbendazim                    | NA/ 6.5                                                        | NA/8.0     | 0.22/ CF                                                  | 26                                           | 1.5/NA/ 12                 | As above                                                                                                                                            |                                                                        | 0.1/0.003                                      | 0.02/98                                                         |                               |
|                                       | *   | Methylparaben                  | NA/ 6.5                                                        | NA/8.0     | 0.22/ CF                                                  | 26                                           | 1.5/NA/ 12                 | As above                                                                                                                                            |                                                                        | 0.06/0.01                                      | 0.01/77                                                         |                               |

| Wetland type/Scale/ type of treatment | W T | PCPs       | Depth (m)/Area (m <sup>2</sup> PE <sup>-1</sup> ) | T (°C) /pH | HLR (m <sup>3</sup> m <sup>-2</sup> d <sup>-1</sup> )/ OM | OLR (g COD m <sup>-2</sup> d <sup>-1</sup> ) | HRT (days) /SA/ED (months) | Filter media (mm)/Plants                                                            | Effluent DO (mg L <sup>-1</sup> )/ ORP (Inf/Eff) (mV) | Influent/ Effluent conc. (µg L <sup>-1</sup> ) | Removal rate (mg m <sup>-2</sup> d <sup>-1</sup> )/ Removal (%) | Author/ Country             |
|---------------------------------------|-----|------------|---------------------------------------------------|------------|-----------------------------------------------------------|----------------------------------------------|----------------------------|-------------------------------------------------------------------------------------|-------------------------------------------------------|------------------------------------------------|-----------------------------------------------------------------|-----------------------------|
| Pilot (V+V)/ Secondary                | D   | Acesulfame | (0.85 <sup>VG</sup> / 0.85 <sup>VS</sup> )/ 4.0   | 12/6.9     | 0.05/IF                                                   | 30                                           | NA/60/12                   | Gravel (4-8) <sup>VG</sup> / Sand (1-3) <sup>VS</sup> / <i>Phragmites australis</i> | 9.0/ (-270/ +207)                                     | 19/8.7                                         | 0.5/54                                                          | Nivala et al. [19]/ Germany |

Note: Free water surface flow constructed wetland (FWSCW); Horizontal flow constructed wetland (HFCW); Vertical flow constructed wetland (VFCW); Hybrid constructed wetland (HCW); Wastewater type (WT); Domestic (D); Healthcare facility/hospital (H); Personal care products (PCPs); Temperature (T); Hydraulic loading rate (HLR); Operational mode (OM); Intermittently fed (IF); Continuously fed (CF); Organic loading rate (OLR); Chemical oxygen demand (COD); Hydraulic retention time (HRT); System age (SA); Experiment duration (ED); Dissolved oxygen (DO); Oxidation-reduction potential (ORP); Not available (NA); Not removed (NR).

Domestic (70%) and livestock sewage (30%) (\*); Two FWSCWs are connected in series (<sup>FWS+FWS</sup>); Two HFCWs are connected in parallel with one HFCW in series (<sup>H+H+H</sup>); FWSCWs on top of horizontal flow filter (<sup>FWS+H</sup>); Two HFCWs and one FWSCW are connected in series (<sup>H+H+FWS</sup>); Two polishing ponds and one FWSCW are connected in parallel (<sup>P+P+FWS</sup>); Facultative pond, FWSCW and HFCW are connected in series (<sup>FP+FWS+H</sup>); Two VFCWs are connected in parallel, and HFCW and FWSCW are connected in series (<sup>V+V+H+FWS</sup>); VFCW, HFCW and FWSCW are connected in series (<sup>V+H+FWS</sup>); Two HFCWs are connected in parallel (<sup>H+H</sup>); VFCW and HFCW are in a stack design (<sup>V+H</sup>)\*\*; Three FWSCWs, one VFCW and one stabilization lagoon are connected in series (<sup>FWS+V+FWS+FWS+SL</sup>); Two VFCWs are connected in parallel (<sup>V+V</sup>).

The Population equivalent (PE) is calculated based on the common relation 1 PE = 60 g BOD d<sup>-1</sup>. BOD values were approximated using the ratio COD/BOD = 2 in the studies where BOD was not reported [36,37], and COD values were approximated using the ratio COD = 2BOD in the studies where COD was not reported [5,14,19,29].

## Supplementary materials 2: Contribution of removal mechanisms of PCPs in experimental studies and CWs.

**Table S5.** Contribution of removal mechanisms/pathways of PCPs in hydroponic microcosms, media adsorption experiments, and CWs.

| PCPs                       | Removal mechanism | Contribution in removal (%) from different mechanisms | References                 |
|----------------------------|-------------------|-------------------------------------------------------|----------------------------|
| Triclosan                  | Biodegradation    | 84                                                    | Li et al. [7]              |
|                            | Photodegradation  | 58                                                    | Li et al. [7]              |
|                            | Photodegradation  | 80                                                    | Matamoros et al. [40]      |
|                            | Sorption          | 19                                                    | Matamoros et al. [40]      |
|                            | Plant uptake      | 11                                                    | Li et al. [7]              |
| Methyl dihydrojasmonate    | Plant uptake      | 67±26                                                 | Hijosa-Valsero et al. [3]  |
|                            | Plant uptake      | 71±24                                                 | Reyes-Contreras et al. [4] |
|                            | Plant uptake      | 85±8                                                  | Hijosa-Valsero et al. [5]  |
| Galaxolide                 | Plant uptake      | 51±34                                                 | Hijosa-Valsero et al. [3]  |
|                            | Plant uptake      | 59±30                                                 | Reyes-Contreras et al. [4] |
|                            | Plant uptake      | 85±6                                                  | Hijosa-Valsero et al. [5]  |
| Tonalide                   | Plant uptake      | 45±36                                                 | Hijosa-Valsero et al. [3]  |
|                            | Plant uptake      | 53±25                                                 | Reyes-Contreras et al. [4] |
|                            | Plant uptake      | 80±6                                                  | Hijosa-Valsero et al. [5]  |
| N,N-diethyl-meta-toluamide | Biodegradation    | 4.5                                                   | Li et al. [7]              |
|                            | Photodegradation  | 1.2                                                   | Li et al. [7]              |
|                            | Plant uptake      | 9.1                                                   | Li et al. [7]              |

**Supplementary materials 3: The estimated statistics (mean and standard deviation of concentration and removal) for personal care products for which three or more data points were available.**

**Table S6.** Mean and standard deviation of 15 widely studied personal care products.

| Class/PCPs                     | No. of observation based on removal (%) | Influent conc. ( $\mu\text{g L}^{-1}$ )<br>Mean $\pm$ Stdev | Effluent conc. ( $\mu\text{g L}^{-1}$ )<br>Mean $\pm$ Stdev | Removal rate ( $\text{mg m}^{-2} \text{d}^{-1}$ )<br>Mean $\pm$ Stdev | Removal efficiency (%)<br>Mean $\pm$ Stdev |
|--------------------------------|-----------------------------------------|-------------------------------------------------------------|-------------------------------------------------------------|-----------------------------------------------------------------------|--------------------------------------------|
| <b>Artificial sweeteners</b>   |                                         |                                                             |                                                             |                                                                       |                                            |
| Acesulfame                     | 6                                       | 19 $\pm$ 0                                                  | 16 $\pm$ 5                                                  | 0.1 $\pm$ 0.3                                                         | 17 $\pm$ 27                                |
| <b>Preservatives</b>           |                                         |                                                             |                                                             |                                                                       |                                            |
| Methylparaben                  | 10                                      | 39 $\pm$ 73                                                 | 4.2 $\pm$ 7.6                                               | 4.3 $\pm$ 7.9                                                         | 46 $\pm$ 33                                |
| Propylparaben                  | 5                                       | 60 $\pm$ 82                                                 | 15 $\pm$ 25                                                 | 5.4 $\pm$ 7.6                                                         | 18 $\pm$ 55                                |
| <b>Insect repellents</b>       |                                         |                                                             |                                                             |                                                                       |                                            |
| N,N-diethyl-meta-toluamide     | 4                                       | 8 $\pm$ 11                                                  | 7 $\pm$ 12                                                  | 0.1 $\pm$ 0.1                                                         | 52 $\pm$ 45                                |
| <b>Antiseptics</b>             |                                         |                                                             |                                                             |                                                                       |                                            |
| Triclosan                      | 46                                      | 39 $\pm$ 110                                                | 1.3 $\pm$ 3.1                                               | 3.8 $\pm$ 6.4                                                         | 72 $\pm$ 28                                |
| Triclocarban                   | 5                                       | 0.1 $\pm$ 0.1                                               | 0.01 $\pm$ 0.0                                              | NA                                                                    | 62 $\pm$ 44                                |
| <b>Fragrances</b>              |                                         |                                                             |                                                             |                                                                       |                                            |
| Methyl dihydro-jasmonate       | 76                                      | 7.1 $\pm$ 4.4                                               | 1.9 $\pm$ 2.2                                               | 0.5 $\pm$ 0.4                                                         | 74 $\pm$ 20                                |
| Cashmeran                      | 3                                       | 0.2                                                         | 0.03                                                        | 0.02                                                                  | 56 $\pm$ 21                                |
| Galaxolide                     | 73                                      | 2.2 $\pm$ 1.0                                               | 0.9 $\pm$ 0.6                                               | 0.2 $\pm$ 0.2                                                         | 59 $\pm$ 26                                |
| Tonalide                       | 57                                      | 0.6 $\pm$ 0.6                                               | 0.2 $\pm$ 0.2                                               | 0.02 $\pm$ 0.03                                                       | 62 $\pm$ 25                                |
| <b>Flame retardants</b>        |                                         |                                                             |                                                             |                                                                       |                                            |
| Tributyl phosphate             | 5                                       | 0.4 $\pm$ 0.3                                               | 0.2 $\pm$ 0.1                                               | 0.004 $\pm$ 0.005                                                     | 45 $\pm$ 14                                |
| Triphenyl phosphate            | 4                                       | 0.1 $\pm$ 0.0                                               | 0.02 $\pm$ 0.01                                             | 0.0002 $\pm$ 0.0                                                      | 66 $\pm$ 19                                |
| Tris (2-chloroethyl) phosphate | 6                                       | 0.4 $\pm$ 0.2                                               | 0.3 $\pm$ 0.1                                               | 0.004 $\pm$ 0.006                                                     | 19 $\pm$ 9                                 |
| <b>Sunscreen agents</b>        |                                         |                                                             |                                                             |                                                                       |                                            |
| Oxybenzone                     | 14                                      | 3.6 $\pm$ 4.9                                               | 0.3 $\pm$ 0.3                                               | 0.2 $\pm$ 0.3                                                         | 84 $\pm$ 17                                |
| Sulisobenzzone                 | 3                                       | 4.2 $\pm$ 0.0                                               | 3.8 $\pm$ 0.1                                               | 1.2 $\pm$ 0.3                                                         | 9.0 $\pm$ 1.9                              |

## Supplementary materials 4: The selected statistics on risk quotient for nine PCPs based on effluent concentration in CWs.

**Table S7.** The statistics on risk quotient of nine selected PCPs based on effluent concentration in CWs.

| Class/PCPs                     | N  | Mean   | STDEV  | Min   | Max     | P10   | P25   | P50   | P75   | P90    |
|--------------------------------|----|--------|--------|-------|---------|-------|-------|-------|-------|--------|
| <b>Preservatives</b>           |    |        |        |       |         |       |       |       |       |        |
| Methylparaben                  | 8  | 0.379  | 0.679  | 0.001 | 1.607   | 0.002 | 0.002 | 0.014 | 0.375 | 1.420  |
| <b>Antiseptics</b>             |    |        |        |       |         |       |       |       |       |        |
| Triclosan                      | 40 | 10.191 | 23.668 | 0.008 | 100.000 | 0.077 | 0.231 | 0.769 | 6.346 | 40.846 |
| Triclocarban                   | 5  | 1.000  | 0.000  | 1.000 | 1.000   | 1.000 | 1.000 | 1.000 | 1.000 | 1.000  |
| <b>Fragrances</b>              |    |        |        |       |         |       |       |       |       |        |
| Methyl dihydro-jasmonate       | 74 | 0.122  | 0.137  | 0.006 | 0.633   | 0.013 | 0.038 | 0.060 | 0.169 | 0.374  |
| Galaxolide                     | 76 | 0.260  | 0.169  | 0.011 | 0.771   | 0.086 | 0.114 | 0.229 | 0.371 | 0.514  |
| Tonalide                       | 58 | 0.033  | 0.027  | 0.003 | 0.132   | 0.015 | 0.015 | 0.029 | 0.044 | 0.059  |
| <b>Flame retardants</b>        |    |        |        |       |         |       |       |       |       |        |
| Tributyl phosphate             | 3  | 0.030  | 0.024  | 0.003 | 0.052   | 0.010 | 0.019 | 0.034 | 0.043 | 0.048  |
| Tris (2-chloroethyl) phosphate | 3  | 0.001  | 0.001  | 0.001 | 0.002   | 0.001 | 0.001 | 0.002 | 0.002 | 0.002  |
| <b>Sunscreen agents</b>        |    |        |        |       |         |       |       |       |       |        |
| Oxybenzone                     | 11 | 0.143  | 0.163  | 0.016 | 0.579   | 0.016 | 0.034 | 0.105 | 0.184 | 0.211  |

Note: Number of datapoints (N); Standard deviation (STDEV); Minimum (Min); Maximum (Max); Percentile (P); Risk is categorized into four levels: high risk ( $RQ > 1.0$ ), medium risk ( $0.1 \leq RQ \leq 1.0$ ), low risk ( $0.01 \leq RQ \leq 0.1$ ), and no risk ( $RQ < 0.01$ ); Statistics were not calculated in the case of cashmeran and triphenyl phosphate due to one and two data point, respectively.

## Supplementary materials 5: A synthesis on the role of physicochemical properties of EOCs in their removal mechanisms.

**Table S8.** Role of physicochemical properties of EOCs in their removal mechanisms.

| Physicochemical properties | Definition                                                                                                                                                                                                                                                                                                                                      | References                                    | Values              | Nature of the compound | References                                                                                             | Expected removal mechanism                                      |
|----------------------------|-------------------------------------------------------------------------------------------------------------------------------------------------------------------------------------------------------------------------------------------------------------------------------------------------------------------------------------------------|-----------------------------------------------|---------------------|------------------------|--------------------------------------------------------------------------------------------------------|-----------------------------------------------------------------|
| Log Kow                    | This is the ratio of the concentration of unionized compound between octanol and water and for organic compounds, it is considered as the standard measure of their hydrophobicity. The hydrophobicity of non-ionic organic compounds is invariable under different pH conditions, thus Log Kow is appropriate to measure their hydrophobicity. | Burken and Schnoor [41]; Reinhold et al. [42] | Log Kow > 4.0       | Highly hydrophobic     | Briggs et al. [43]; Alvarez et al. [44]; Le-Minh et al. [45]; Dan et al. [46]                          | Adsorption                                                      |
|                            |                                                                                                                                                                                                                                                                                                                                                 |                                               | 1.0 < Log Kow < 3.5 | Moderately hydrophobic | Briggs et al. [43]; Dietz and Schnoor [47]; Alvarez et al. [44]; Pilon-Smits [48]; Le-Minh et al. [45] | Plant uptake                                                    |
|                            |                                                                                                                                                                                                                                                                                                                                                 |                                               | Log Kow > 3.5       | Highly hydrophobic     | Dietz and Schnoor [47]                                                                                 | Phytostabilization; rhizosphere bioremediation (biodegradation) |
|                            |                                                                                                                                                                                                                                                                                                                                                 |                                               | Log Kow < 1.0       | Highly hydrophilic     | Vystavna et al. [38]                                                                                   | Other than adsorption/ plant uptake                             |
| Log Dow                    | In the case of ionic organic compounds Log Dow is appropriate to represent the hydrophobicity, since the hydrophobicity of ionic organic compounds varies due to                                                                                                                                                                                | Lee et al. [49]                               | Log Dow > 2.5       | Highly hydrophobic     | Briggs et al. [43]; Alvarez et al. [44]; Le-Minh et al. [45]; Dan et al. [46]                          | Adsorption                                                      |



| Physicochemical properties | Definition                                                                                                                                                                               | References             | Values                | Nature of the compound        | References                                                                                             | Expected removal mechanism     |
|----------------------------|------------------------------------------------------------------------------------------------------------------------------------------------------------------------------------------|------------------------|-----------------------|-------------------------------|--------------------------------------------------------------------------------------------------------|--------------------------------|
|                            | ionization of the compound at certain pH.                                                                                                                                                |                        | Log Dow < 2.5         | Moderately hydrophobic        | Briggs et al. [43]; Dietz and Schnoor [47]; Alvarez et al. [44]; Pilon-Smits [48]; Le-Minh et al. [45] | Plant uptake                   |
|                            | Although, the Log Dow of organic compounds is nearly the same as Log Kow but the modification in ionizable functional groups may affect their removal by biological treatment processes. | Zhang et al. [50]      |                       |                               |                                                                                                        |                                |
| Log Koc                    | This is the ratio of the mass of a compound that is adsorbed in the soil per unit mass of organic carbon in the soil.                                                                    | Piwoni and Keeley [51] | High<br>Log Koc > 2.5 | Less mobile organic compounds | Piwoni and Keeley [51]                                                                                 | Sorption onto organic surfaces |
|                            |                                                                                                                                                                                          |                        | Low<br>Log Koc < 2.5  | More mobile organic compounds | Piwoni and Keeley [51]                                                                                 |                                |
| Charge                     | The neutral compounds which are hydrophilic in nature (Log Kow < 1.5) may be taken up by rooted vascular plants via hydrogen bonding with water molecules into the transpiration stream. | Petrie et al. [18]     | -                     | Neutral                       | Petrie et al. [18]                                                                                     | Plant uptake                   |
|                            | The cationic compounds can partition into lipophilic cell structure of negatively charged biomembranes of the plant roots.                                                               | Petrie et al. [18]     | -                     | Cationic                      | Petrie et al. [18]                                                                                     | Plant uptake                   |

| Physicochemical properties | Definition                                                                                                                                                                       | References                                | Values                       | Nature of the compound | References                                | Expected removal mechanism             |
|----------------------------|----------------------------------------------------------------------------------------------------------------------------------------------------------------------------------|-------------------------------------------|------------------------------|------------------------|-------------------------------------------|----------------------------------------|
|                            | The negatively charged compounds cannot be taken up by the plants because the charge repulsion with the negatively charged biomembrane restricts their uptake by the plant root. | Matamoros et al. [40]; Petrie et al. [18] | -                            | Anionic                | Matamoros et al. [40]; Petrie et al. [18] | Adsorption                             |
| Molecular weight           | Molecular weight is a measure of the sum of the atomic weight values of the atoms in a molecule.                                                                                 | *                                         | MW > 500 g mol <sup>-1</sup> | High                   | Yan et al. [52]                           | Adsorption                             |
|                            |                                                                                                                                                                                  |                                           | MW < 500 g mol <sup>-1</sup> | Moderate               | Yan et al. [52]                           | Plant uptake                           |
|                            |                                                                                                                                                                                  |                                           | MW < 100 g mol <sup>-1</sup> | Low                    | Vystavna et al. [38]                      | Other than adsorption/<br>plant uptake |
| Water solubility           | Water solubility is a measure of the amount of chemical substance that can dissolve in water at a specific temperature.                                                          | **                                        | WS > 1000 mg L <sup>-1</sup> | High water solubility  | Vystavna et al. [38]                      | Other than adsorption/<br>plant uptake |

Note: <https://www.thoughtco.com/definition-of-molecular-weight-605369> (\*); [https://www.chemsafetypro.com/Topics/CRA/Water\\_Solubility.html](https://www.chemsafetypro.com/Topics/CRA/Water_Solubility.html) (\*\*).

## Supplementary materials 6: Role of physicochemical properties of PCPs and removal mechanisms in CWs.

**Table S9.** Role of physicochemical properties of PCPs and removal mechanisms in CWs

| Class/ PCPs                  | Role of physicochemical properties of PCPs and removal mechanisms in CWs                                                                                                                                                                                                                                                                                                                                                                                                                                                                                                                                                                                                                                                                                                                                                                                                                                                                                                                                                                                                                                                                                                                                                                                                                                                                                                                                                                                                                                                                                                                                                                                                                                                   |
|------------------------------|----------------------------------------------------------------------------------------------------------------------------------------------------------------------------------------------------------------------------------------------------------------------------------------------------------------------------------------------------------------------------------------------------------------------------------------------------------------------------------------------------------------------------------------------------------------------------------------------------------------------------------------------------------------------------------------------------------------------------------------------------------------------------------------------------------------------------------------------------------------------------------------------------------------------------------------------------------------------------------------------------------------------------------------------------------------------------------------------------------------------------------------------------------------------------------------------------------------------------------------------------------------------------------------------------------------------------------------------------------------------------------------------------------------------------------------------------------------------------------------------------------------------------------------------------------------------------------------------------------------------------------------------------------------------------------------------------------------------------|
| <b>Artificial sweeteners</b> |                                                                                                                                                                                                                                                                                                                                                                                                                                                                                                                                                                                                                                                                                                                                                                                                                                                                                                                                                                                                                                                                                                                                                                                                                                                                                                                                                                                                                                                                                                                                                                                                                                                                                                                            |
| <b>Acesulfame</b>            | <p>The removal efficiency of acesulfame was moderate in HCW (51±5%) but very low in HFCW (2.5±3.5%), and it was negatively removed in VFCW (-3.5±2.1%) (Table S10). Its high water solubility (270 g L<sup>-1</sup> at 25 °C) with low molecular weight (163.15 g mol<sup>-1</sup>), very low lipophilicity (Log Kow = -1.33; Log Dow = -1.49), and anionic form under neutral conditions (pH = 7) (Table 4), which might hinder its uptake by the plants as well as adsorption to the substrate. Jekel et al. [53] reported that it is persistent to biodegradation in biological treatment. However, some recent studies attributed its removal to biodegradation in biological wastewater treatment [54-56]. This can be explained by its higher removal efficiency in HCW containing two types of substrate media (gravel-based VFCW and subsequent sand-based VFCW). This is due to the reason that sand media provided a larger available surface area for microbial growth and higher oxygen to promote the elimination of substances that are majorly removed by aerobic biodegradation pathways. It was poorly removed by gravel-based HFCW and negatively removed in gravel-based VFCW. However, its moderate removal efficiency was achieved in subsequent sand-based VFCW [14,19]. Its removal by aerobic biodegradation is explicit by significantly higher removal efficiency in aerated (AA)-HFCW (71±12%) and AA-VFCW (54±1%) compared with their corresponding non-aerated (NA)-CWs (2.5±3.5% and -3.5±2.1%, respectively) [14,19] (Table S3). This is moderately biodegradable compound and improvement in dissolved oxygen (DO) level in the aerated CWs might contribute to this enhanced removal.</p> |
| <b>Preservatives</b>         |                                                                                                                                                                                                                                                                                                                                                                                                                                                                                                                                                                                                                                                                                                                                                                                                                                                                                                                                                                                                                                                                                                                                                                                                                                                                                                                                                                                                                                                                                                                                                                                                                                                                                                                            |
| <b>Propylparaben</b>         | <p>The removal efficiency of propylparaben was moderate in FWSCW (75±20%) and it was negatively removed in HFCW (-21±21%) (Table S10). It is moderately soluble in water (529.3 mg L<sup>-1</sup> at 25 °C) and its moderate hydrophobicity and distribution coefficient (Log Kow = 2.98; Log Dow = 2.51) with low molecular weight (180.21 g mol<sup>-1</sup>), and neutral form under neutral conditions (pH = 7) (Table 4) suggest its removal by plant uptake. Anjos et al. [8] attributed its removal to plant uptake. The removal efficiency by FWSCW, planted with <i>Landoltia punctata</i> and <i>Lemna minor</i>, was 61% and 89%, respectively (Table S1). In addition to direct uptake, the indirect positive effects of plants presence such as degradation by enzymatic exudates and aerobic biodegradation facilitated by the release of root exudates (such as carbohydrates and amino acids), and oxygen by the plant roots in the rhizosphere [17,37,40,57] might contribute to its removal [40]. These processes might take place in HFCW but its negative removal suggests that photodegradation could contribute to its removal in FWSCW.</p>                                                                                                                                                                                                                                                                                                                                                                                                                                                                                                                                                         |
| <b>Insect repellents</b>     |                                                                                                                                                                                                                                                                                                                                                                                                                                                                                                                                                                                                                                                                                                                                                                                                                                                                                                                                                                                                                                                                                                                                                                                                                                                                                                                                                                                                                                                                                                                                                                                                                                                                                                                            |

|                            |                                                                                                                                                                                                                                                                                                                                                                                                                                                                                                                                                                                                                                                                                                                                                                                                                                                                                                                                                                                                                                                                                                                                                                                                                                                                                                                                                                                                                                                                                                                                                                                                                                                                                                           |
|----------------------------|-----------------------------------------------------------------------------------------------------------------------------------------------------------------------------------------------------------------------------------------------------------------------------------------------------------------------------------------------------------------------------------------------------------------------------------------------------------------------------------------------------------------------------------------------------------------------------------------------------------------------------------------------------------------------------------------------------------------------------------------------------------------------------------------------------------------------------------------------------------------------------------------------------------------------------------------------------------------------------------------------------------------------------------------------------------------------------------------------------------------------------------------------------------------------------------------------------------------------------------------------------------------------------------------------------------------------------------------------------------------------------------------------------------------------------------------------------------------------------------------------------------------------------------------------------------------------------------------------------------------------------------------------------------------------------------------------------------|
| N,N-diethyl-meta-toluamide | <p>The removal efficiency of N,N-diethyl-meta-toluamide was higher in HFCW (98%) compared with HCW (80%). It was poorly removed in VFCW (28%), but FWSCW did not show any removal (0.0%) (Table S10). It is moderately soluble in water (912 mg L<sup>-1</sup> at 25 °C) and its moderate hydrophobicity and distribution coefficient (Log Kow = 2.18; Log Dow = 2.50) with low molecular weight (191.3 g mol<sup>-1</sup>), and neutral form under neutral conditions (pH = 7) (Table 4) suggest its removal by plant uptake. In spite of this, the lower contribution of plants (9.1%) in hydroponic system (<i>Spirodela polyrhiza</i>) compared with the control without plants (17% and 7.9%, respectively) reveals that this removal pathway is contributing very less in its removal (Figure 3 and Table S5). Furthermore, its organic carbon sorption capacity is also low (Log Koc = 1.76) (Table 4). Thus, the efficient removal in CWs might be due to enhancement in biodegradation processes in the presence of plants. However, in the <i>E-coli</i> biodegradation experiment the highest removal observed was very low (4.5%) [7] (Figure 3 and Table S5). The highest removal in HFCW followed by HCW indicates that predominantly anaerobic and slightly aerobic conditions might favor its removal [15,24]. In FWSCW, the major process contributes in PCPs removal is photodegradation. This compound is not removed in FWSCWs, which can be explained by its persistence against light. In photodegradation experiment, it has been demonstrated that this compound is not light sensitive (1.2% removal efficiency at highest by photodegradation) [7] (Figure 3 and Table S5).</p> |
| <b>Antiseptics</b>         |                                                                                                                                                                                                                                                                                                                                                                                                                                                                                                                                                                                                                                                                                                                                                                                                                                                                                                                                                                                                                                                                                                                                                                                                                                                                                                                                                                                                                                                                                                                                                                                                                                                                                                           |
| Triclocarban               | <p>The removal efficiency of triclocarban was higher in HFCW (81±13%) but it was negatively removed in HCW (-14%) (Table S10). It is almost insoluble in water (0.11 mg L<sup>-1</sup> at 25 °C), highly hydrophobic (Log Kow = 4.90; Log Dow = 4.90) with moderate molecular weight (315.6 g mol<sup>-1</sup>) (Table 4), which suggest its removal by adsorption onto soil particles. Its high organic carbon sorption capacity (Log Koc = 3.73) also favors its removal by sorption onto organic surfaces. This can be seen by its significant positive correlation with the removal of chemical oxygen demand (COD) [16]. Consistent with that, Zhu and Chen [33] estimated its high concentration in sediments reaching an average value of 6.6 mg kg<sup>-1</sup>, which indicates that sorption to sediments or sludge mainly contributed to its removal.</p>                                                                                                                                                                                                                                                                                                                                                                                                                                                                                                                                                                                                                                                                                                                                                                                                                                      |
| <b>Fragrances</b>          |                                                                                                                                                                                                                                                                                                                                                                                                                                                                                                                                                                                                                                                                                                                                                                                                                                                                                                                                                                                                                                                                                                                                                                                                                                                                                                                                                                                                                                                                                                                                                                                                                                                                                                           |
| Cashmeran                  | <p>The removal efficiency of cashmeran was moderate in HCW (56±21%) (Table S10). Its high hydrophobicity (Log Kow = 4.49), very low water solubility (5.94 mg L<sup>-1</sup> at 25 °C), with moderate molecular weight (206.33 g mol<sup>-1</sup>) (Table 4) suggest its removal by adsorption onto soil particles. This can be explained by its higher removal efficiency in winter compared with summer (50% and 39%, respectively) [36] (Table S4). Since adsorption is an exothermic process, which is favored by low temperature (in winter). Its high organic carbon sorption capacity (Log Koc = 2.99) also favors its removal by sorption onto organic surfaces. This can be seen by the efficient removal in FWSCW compared with pond of the HCW (combination of two ponds and one FWSCW). The roots of the plants in the CWs increase the accumulation of organic matter as well as the sorption capacity [31].</p>                                                                                                                                                                                                                                                                                                                                                                                                                                                                                                                                                                                                                                                                                                                                                                             |
| <b>Flame retardants</b>    |                                                                                                                                                                                                                                                                                                                                                                                                                                                                                                                                                                                                                                                                                                                                                                                                                                                                                                                                                                                                                                                                                                                                                                                                                                                                                                                                                                                                                                                                                                                                                                                                                                                                                                           |

|                                |                                                                                                                                                                                                                                                                                                                                                                                                                                                                                                                                                                                                                                                                                                                                                                                                                                                                                                                                                                                                                                                                                                                                                                                               |
|--------------------------------|-----------------------------------------------------------------------------------------------------------------------------------------------------------------------------------------------------------------------------------------------------------------------------------------------------------------------------------------------------------------------------------------------------------------------------------------------------------------------------------------------------------------------------------------------------------------------------------------------------------------------------------------------------------------------------------------------------------------------------------------------------------------------------------------------------------------------------------------------------------------------------------------------------------------------------------------------------------------------------------------------------------------------------------------------------------------------------------------------------------------------------------------------------------------------------------------------|
| Tributyl phosphate             | <p>The removal efficiency of tributyl phosphate was moderate in HFCW (48±19%) and HCW (43±15%) (Table S10). It is highly hydrophobic (Log Kow = 4.00) with slight water solubility (280 mg L<sup>-1</sup> at 25 °C), and moderate molecular weight (266.32 g mol<sup>-1</sup>), which favors its removal by adsorption to substrate. Its high organic carbon sorption capacity (Log Koc = 3.60) (Table 4) suggests its removal by sorption onto organic surfaces. This is explicit by its significant positive correlation with the removal of total suspended solids (TSS) and COD [13]. This can also be seen by its slightly better removal efficiency in summer compared with winter (37% and 32%, respectively) [36] (Table S4) due to the higher activity of the rooted plants in the warm season, since the roots of the plants in the CWs increase the accumulation of organic matter and the sorption capacity [31]. The other indirect positive effect of plants presence such as enhancement in biodegradation might also contribute to its removal, which is revealed by its strong positive relationship with ammonium-nitrogen (NH<sub>4</sub><sup>+</sup>-N) removal [36].</p> |
| Triphenyl phosphate            | <p>The removal efficiency of triphenyl phosphate was moderate in HFCW (79±5%) and HCW (53±21%) (Table S10). It is almost insoluble in water (1.9 mg L<sup>-1</sup> at 25 °C), highly hydrophobic (Log Kow = 4.59) with moderate molecular weight (326.29 g mol<sup>-1</sup>), which suggest its adsorption to substrate as a major removal mechanism. Its high organic carbon sorption capacity (Log Koc = 4.03) (Table 4) reveals its removal by sorption onto organic surfaces, which can be explained by its significant positive correlation with the removal of TSS and COD [13]. It shows a higher removal efficiency in summer compared with winter (67% and 38%, respectively) [36] (Table S4) because of efficient growth of the rooted plants in the warm season also reveals the contribution of this removal pathway. Furthermore, the enhancement in biodegradation in the presence of plants might also contribute to its removal, which is shown by its significant positive correlation with NH<sub>4</sub><sup>+</sup>-N removal [36].</p>                                                                                                                                   |
| Tris (2-chloroethyl) phosphate | <p>The removal efficiency of tris (2-chloroethyl) phosphate was very low in HFCW (24±6%) and HCW (17±10%) (Table S10). It is highly water soluble (7.82 g L<sup>-1</sup> at 25 °C) with moderate hydrophobicity (Log Kow = 1.44), and moderate molecular weight (285.48 g mol<sup>-1</sup>). It is neutral in nature under neutral conditions (pH = 7) (Table 4), which favors its removal by plant uptake. Its moderate organic carbon sorption capacity (Log Koc = 2.48) also suggests its removal by sorption onto organic surfaces. This is explicit by its significant positive correlation with the removal of TSS and COD [13]. Considering the efficient growth of the rooted plants in summer and the ability of roots to increase the accumulation of organic matter as well as the sorption capacity [31], its higher removal efficiency was observed in summer compared with winter (24% and 7.0%, respectively) [36] (Table S4). However, this compound showed very low removal because of its high recalcitrance [13,58], which might be due to the presence of chlorine in its structure.</p>                                                                                  |
| <b>Sunscreens agents</b>       |                                                                                                                                                                                                                                                                                                                                                                                                                                                                                                                                                                                                                                                                                                                                                                                                                                                                                                                                                                                                                                                                                                                                                                                               |

|               |                                                                                                                                                                                                                                                                                                                                                                                                                                                                                                                                                                                                                                                                                                                                                                                                                                                                                                                                                                                                                                                                                                                                                                                                                                                                                                                                                                                                                                                                                                                                                                |
|---------------|----------------------------------------------------------------------------------------------------------------------------------------------------------------------------------------------------------------------------------------------------------------------------------------------------------------------------------------------------------------------------------------------------------------------------------------------------------------------------------------------------------------------------------------------------------------------------------------------------------------------------------------------------------------------------------------------------------------------------------------------------------------------------------------------------------------------------------------------------------------------------------------------------------------------------------------------------------------------------------------------------------------------------------------------------------------------------------------------------------------------------------------------------------------------------------------------------------------------------------------------------------------------------------------------------------------------------------------------------------------------------------------------------------------------------------------------------------------------------------------------------------------------------------------------------------------|
| Sulisobenzone | <p>The removal efficiency of sulisobenzone was very low in HFCW (<math>9.0 \pm 1.9\%</math>) (Table S10). It is highly water soluble (<math>20.3 \text{ g L}^{-1}</math> at <math>25 \text{ }^{\circ}\text{C}</math>) with moderate molecular weight (<math>308.31 \text{ g mol}^{-1}</math>), highly hydrophilic (<math>\text{Log Kow} = 0.37</math>), and anionic under neutral conditions (<math>\text{pH} = 7</math>) (Table 4), which might hinder its uptake by the plants as well as adsorption to the substrate. Its anionic form and very low lipophilicity (<math>\text{Log Dow} = -0.53</math>) (Table 4) hinders its partition into lipophilic cell structure of negatively charged biomembranes of the plant roots because of the charge repulsion. Although its molecular weight is moderate, but it is most hydrophilic (<math>\text{Log Kow} &lt; 1.0</math>) and the most water soluble (<math>\text{WS} &gt; 1000 \text{ mg L}^{-1}</math>), thus adsorption cannot be considered as a removal mechanism because for the sorption/sedimentation of these types of compounds more time is required [38]. Therefore, this low removal can be attributed to biodegradation, which has been established in other wastewater treatment technologies. For instance, in contact with activated sludge it was degraded in aerobic batch experiments forming at least nine transformation products (TPs) [59]. Beel et al. [59] proposed biodegradation pathway based on the structure of the TPs identified and the sequence of their formation.</p> |
|---------------|----------------------------------------------------------------------------------------------------------------------------------------------------------------------------------------------------------------------------------------------------------------------------------------------------------------------------------------------------------------------------------------------------------------------------------------------------------------------------------------------------------------------------------------------------------------------------------------------------------------------------------------------------------------------------------------------------------------------------------------------------------------------------------------------------------------------------------------------------------------------------------------------------------------------------------------------------------------------------------------------------------------------------------------------------------------------------------------------------------------------------------------------------------------------------------------------------------------------------------------------------------------------------------------------------------------------------------------------------------------------------------------------------------------------------------------------------------------------------------------------------------------------------------------------------------------|

## Supplementary materials 7: The removal efficiency of 15 widely studied PCPs and the results of one-way ANOVA and z-Test for comparison of means of six selected PCPs.

**Table S10.** Removal efficiency (mean % and standard deviation) of 15 widely studied PCPs in different types of CWs.

| Class/PCPs                     | FWSCW (n)  | HFCW (n)    | VFCW (n)     | HCW (n)    |
|--------------------------------|------------|-------------|--------------|------------|
| <b>Artificial sweeteners</b>   |            |             |              |            |
| Acesulfame                     | NA         | 2.5±3.5 (2) | -3.5±2.1 (2) | 51±5 (2)   |
| <b>Preservatives</b>           |            |             |              |            |
| Methylparaben                  | 90±1 (2)   | 23±21 (5)   | NA           | 55±22 (3)  |
| Propylparaben                  | 75±20 (2)  | - 21±21 (3) | NA           | NA         |
| <b>Insect repellents</b>       |            |             |              |            |
| N,N-diethyl-meta-toluamide     | 0.0 (1)    | 98 (1)      | 28 (1)       | 80 (1)     |
| <b>Antiseptics</b>             |            |             |              |            |
| Triclosan                      | 97±2 (4)   | 59±31 (18)  | 88±9 (8)     | 77±19 (15) |
| Triclocarban                   | NA         | 81±13 (4)   | NA           | - 14 (1)   |
| <b>Fragrances</b>              |            |             |              |            |
| Methyl dihydrojasmonate        | 71±20 (15) | 73±21 (37)  | 99 (1)       | 76±19 (23) |
| Cashmeran                      | NA         | NA          | NA           | 56±21 (3)  |
| Galaxolide                     | 63±26 (18) | 53±26 (37)  | 90 (1)       | 65±22 (17) |
| Tonalide                       | 59±27 (18) | 43±25 (12)  | 74±11 (3)    | 72±20 (24) |
| <b>Flame retardants</b>        |            |             |              |            |
| Tributyl phosphate             | NA         | 48±19 (2)   | NA           | 43±15 (3)  |
| Triphenyl phosphate            | NA         | 79±5 (2)    | NA           | 53±21 (2)  |
| Tris (2-chloroethyl) phosphate | NA         | 24±6 (2)    | NA           | 17±10 (4)  |
| <b>Sunscreen agents</b>        |            |             |              |            |
| Oxybenzone                     | NA         | 64±28 (3)   | 94±4 (3)     | 88±8 (8)   |
| Sulisobenzene                  | NA         | 9.0±1.9 (3) | NA           | NA         |

Note: Number of data points (n); Not available (NA)

**Table S11.** The results (*p*-values) of one-way ANOVA and z-Test for comparison of means for six selected PCPs with different types of CWs.

| Parameter             | Galaxolide | Methyl dihydro-jasmonate | Tonalide     | Triclosan     | Methylparaben | Oxybenzone  |
|-----------------------|------------|--------------------------|--------------|---------------|---------------|-------------|
| <b>ANOVA results</b>  |            |                          |              |               |               |             |
|                       | 0.21       | 0.70                     | <b>0.01</b>  | <b>0.01</b>   | 0.08          | <b>0.03</b> |
| <b>z-Test results</b> |            |                          |              |               |               |             |
| FWSCW Vs HFCW         | 0.22       | 0.75                     | 0.10         | <b>0.01</b>   | NA            | NA          |
| FWSCW Vs VFCW         | NA         | NA                       | 0.11         | <b>0.01</b>   | NA            | NA          |
| FWSCW Vs HCW          | 0.75       | 0.41                     | 0.1          | <b>0.01</b>   | NA            | NA          |
| HFCW Vs VFCW          | NA         | NA                       | <b>0.002</b> | <b>0.0003</b> | NA            | 0.06        |
| HFCW Vs HCW           | 0.09       | 0.52                     | <b>0.001</b> | 0.05          | <b>0.04</b>   | 0.13        |
| VFCW Vs HCW           | NA         | NA                       | 0.78         | 0.05          | NA            | 0.13        |

Note: Bold values indicate significant difference at  $\alpha = 0.05$  ( $p < 0.05$ ) for ANOVA and z-test results; Not available (NA).

**Supplementary materials 8: The estimated statistics (mean and standard deviation of removal efficiency) of widely studied 15 PCPs in primary, secondary, and tertiary treatment by CWs.**

**Table S12.** Statistics (mean and standard deviation) of widely studied 15 PCPs in primary, secondary, and tertiary treatment by CWs.

| Class/PCPs                     | Primary                                    | Secondary                                  | Tertiary                                   |
|--------------------------------|--------------------------------------------|--------------------------------------------|--------------------------------------------|
|                                | Removal efficiency (%)<br>Mean ± Stdev (n) | Removal efficiency (%)<br>Mean ± Stdev (n) | Removal efficiency (%)<br>Mean ± Stdev (n) |
| <b>Artificial sweeteners</b>   |                                            |                                            |                                            |
| Acesulfame                     | NA                                         | 27±28 (4)                                  | NA                                         |
| <b>Preservatives</b>           |                                            |                                            |                                            |
| Methylparaben                  | 77 (1)                                     | 67±28 (4)                                  | 23±21 (5)                                  |
| Propylparaben                  | NA                                         | 75±20 (2)                                  | 19±17 (3)                                  |
| <b>Insect repellents</b>       |                                            |                                            |                                            |
| N,N-diethyl-meta-toluamide     | 0.0 (1)                                    | 54±37 (2)                                  | 98 (1)                                     |
| <b>Antiseptics</b>             |                                            |                                            |                                            |
| Triclosan                      | 85±15 (17)                                 | 68±31 (16)                                 | 65±27 (12)                                 |
| Triclocarban                   | 79±15 (3)                                  | NA                                         | 86 (1)                                     |
| <b>Fragrances</b>              |                                            |                                            |                                            |
| Methyl dihydro-jasmonate       | 76±18 (24)                                 | 74±22 (49)                                 | 60±4 (3)                                   |
| Cashmeran                      | NA                                         | 45±8 (2)                                   | 80 (1)                                     |
| Galaxolide                     | 61±23 (24)                                 | 55±27 (43)                                 | 76±21 (6)                                  |
| Tonalide                       | NA                                         | 60±25 (51)                                 | 75±22 (6)                                  |
| <b>Flame retardants</b>        |                                            |                                            |                                            |
| Tributyl phosphate             | NA                                         | 35±4 (2)                                   | 52±15 (3)                                  |
| Triphenyl phosphate            | NA                                         | 53±21 (2)                                  | 79±5 (2)                                   |
| Tris (2-chloroethyl) phosphate | NA                                         | 14±10 (3)                                  | 25±5 (3)                                   |
| <b>Sunscreen agents</b>        |                                            |                                            |                                            |
| Oxybenzone                     | NA                                         | 91±6 (10)                                  | 67±24 (4)                                  |
| Sulisobenzzone                 | NA                                         | NA                                         | 9±2 (3)                                    |

Note: Number of data points (n); Not available (NA).



## Supplementary materials 9: Effect of artificial aeration on the removal of PCPs in CWs.

**Table S13.** Removal efficiency (mean % and standard deviation) of PCPs in different types of aerated (AA) and non-aerated (NA) CWs.

| Parameter/<br>PCPs             | NA-FWSCW/<br>AA-FWSCW | NA-HFCW/<br>AA-HFCW | NA-VFCW/<br>AA-VFCW | Dominant removal<br>mechanism*                                  |
|--------------------------------|-----------------------|---------------------|---------------------|-----------------------------------------------------------------|
| DO (mg L <sup>-1</sup> )       | 6.0/NA                | 3.0/10              | 3.8±0.7/6.3±1.5     |                                                                 |
| Triclosan                      | 94/99                 | na                  | 73/86               | Adsorption;<br>Biodegradation<br>(aerobic);<br>Photodegradation |
| Tonalide                       | na                    | na                  | 61/83               | Sorption; Adsorption                                            |
| Oxybenzone                     | na                    | na                  | 89/91               | Adsorption **;<br>Biodegradation<br>(aerobic); Sorption         |
| Acesulfame                     | na                    | 2.5±3.5/71±12       | -3.5±2.1/54±1       | Biodegradation<br>(aerobic)                                     |
| N,N-diethyl-meta-<br>toluamide | 0.0/4.2               | na                  | na                  | Biodegradation<br>(anaerobic)**                                 |

Note: Data is taken from: Ávila et al. [22]; Li et al. [7]; Kahl et al. [14]; and Nivala et al. [19]. The enhanced removal is explicit in the case of AA-FWSCW (triclosan), AA-HFCW (acesulfame), AA-VFCW (triclosan, tonalide, oxybenzone and acesulfame) compared with their corresponding non-aerated CWs; Not available (na); Authors' own insight based on physicochemical properties, removal mechanisms and limited evidence in the literature (\*); Authors' own insight based on physicochemical properties and removal mechanisms (\*\*).

## References

1. Matamoros, V.; García, J.; Bayona, J.M. Organic micropollutant removal in a full-scale surface flow constructed wetland fed with secondary effluent. *Water Res.* **2008**, 42 (3), 653-660. DOI: <https://doi.org/10.1016/j.watres.2007.08.016>
2. Llorens, E.; Matamoros, V.; Domingo, V.; Bayona, J.M.; García, J. Water quality improvement in a full-scale tertiary constructed wetland: effects on conventional and specific organic contaminants. *Sci. Total Environ.* **2009**, 407, 2517-2524. DOI: <https://doi.org/10.1016/j.scitotenv.2008.12.042>
3. Hijosa-Valsero, M.; Matamoros, V.; Sidrach-Cardona, R.; Martín-Villacorta, J.; Becares, E.; Bayona, J.M. Comprehensive assessment of the design configuration of constructed wetlands for the removal of pharmaceuticals and personal care products from urban wastewaters. *Water Res.* **2010**, 44 (12), 3669-3678. DOI: <https://doi.org/10.1016/j.watres.2010.04.022>
4. Reyes-Contreras, C.; Hijosa-Valsero, M.; Sidrach-Cardona, R.; Bayona, J.M.; Bécares, E. Temporal evolution in PPCP removal from urban wastewater by constructed wetlands of different configuration: a medium-term study. *Chemosphere* **2012**, 88 (2), 161-167. DOI: <https://doi.org/10.1016/j.chemosphere.2012.02.064>
5. Hijosa-Valsero, M.; Reyes-Contreras, C.; Domínguez, C.; Bécares, E.; Bayona, J.M. Behaviour of pharmaceuticals and personal care products in constructed wetland compartments: Influent, effluent, pore water, substrate and plant roots. *Chemosphere* **2016**, 145, 508-517. DOI: <https://doi.org/10.1016/j.chemosphere.2015.11.090>
6. Liu, J.; Wang, J.; Zhao, C.; Hay, A.G.; Xie, H.; Zhan, J. Triclosan removal in wetlands constructed with different aquatic plants. *Appl. Microbiol. Biotechnol.* **2016**, 100 (3), 1459-1467. DOI: <https://doi.org/10.1007/s00253-015-7063-6>
7. Li, J.; Zhou, Q.; Campos, L.C. Removal of selected emerging PPCP compounds using greater duckweed (*Spirodela polyrhiza*) based lab-scale free water constructed wetland. *Water Res.* **2017**, 126, 252-261. DOI: <https://doi.org/10.1016/j.watres.2017.09.002>
8. Anjos, M.L.; Isique, W.D.; Albertin, L.L.; Matsumoto, T.; Henares, M.N.P. Parabens Removal from Domestic Sewage by Free-Floating Aquatic Macrophytes. *Waste Biomass Valor.* **2019**, 10 (8), 2221-2226. DOI: <https://doi.org/10.1007/s12649-018-0245-6>
9. Carranza-Díaz, O.; Schultze-Nobre, L.; Moeder, M.; Nivala, J.; Kuschik, P.; Koeser, H. Removal of selected organic micropollutants in planted and unplanted pilot-scale horizontal flow constructed wetlands under conditions of high organic load. *Ecol. Eng.* **2014**, 71, 234-245. DOI: <https://doi.org/10.1016/j.ecoleng.2014.07.048>
10. Zhao, C.; Xie, H.; Xu, J.; Xu, X.; Zhang, J.; Hu, Z.; Liu, C.; Liang, S.; Wang, Q.; Wang, J. Bacterial community variation and microbial mechanism of triclosan (TCS) removal by constructed wetlands with different types of plants. *Sci. Total Environ.* **2015**, 505, 633-639. DOI: <https://doi.org/10.1016/j.scitotenv.2014.10.053>
11. Chen, Y.; Vymazal, J.; Březinová, T.; Koželuh, M.; Kule, L.; Huang, J.; Chen, Z. Occurrence, removal and environmental risk assessment of pharmaceuticals and personal care products in rural wastewater treatment wetlands. *Sci. Total Environ.* **2016**, 566-567, 1660-1669. DOI: <https://doi.org/10.1016/j.scitotenv.2016.06.069>

12. Herrera-Cardenas, J.; Navarro, A.E.; Torres, E. Effects of porous media, macrophyte type and hydraulic retention time on the removal of organic load and micropollutants in constructed wetlands. *J. Environ. Sci. Heal. A.* **2016**, 51 (5), 380-388. DOI: <https://doi.org/10.1080/10934529.2015.1120512>
13. Matamoros, V.; Rodríguez, Y.; Bayona, J.M. Mitigation of emerging contaminants by full-scale horizontal flow constructed wetlands fed with secondary treated wastewater. *Ecol. Eng.* **2017**, 99, 222-227. DOI: <https://doi.org/10.1016/j.ecoleng.2016.11.054>
14. Kahl, S.; Nivala, J.; Afferden, M.V.; Müller, R.A.; Reemtsma, T. Effect of design and operational conditions on the performance of subsurface flow treatment wetlands: Emerging organic contaminants as indicators. *Water Res.* **2017**, 125 (15), 490-500. DOI: <https://doi.org/10.1016/j.watres.2017.09.004>
15. Yi, X.; Tran, N.H.; Yin, T.; He, Y.; Gin, K.Y-H. Removal of selected PPCPs, EDCs, and antibiotic resistance genes in landfill leachate by a full-scale constructed wetlands system. *Water Res.* **2017**, 121, 46-60. DOI: <https://doi.org/10.1016/j.watres.2017.05.008>
16. Vymazal, J.; Březinová, T.D.; Koželuh, M.; Kule, L. Occurrence and removal of pharmaceuticals in four full-scale constructed wetlands in the Czech Republic – the first year of monitoring. *Ecol. Eng.* **2017**, 98, 354-364. DOI: <https://doi.org/10.1016/j.ecoleng.2016.08.010>
17. Salcedo, J.J.P.; Montes, G.H.E.; Frómeta, A.E.N.; Osorio, A.C.; Negrete, J.M. Removal of Organic Micropollutants from Riverine Waters using Constructed Wetlands: A Mesocosms Experiment. *Int. J. Appl. Eng. Res.* **2018**, 13 (22), 15740-15748.
18. Petrie, B.; Rood, S.; Smith, B.D.; Proctor, K.; Youdan, J.; Barden, R.; Kasprzyk-Hordern, B. Biotic phase micropollutant distribution in horizontal sub-surface flow constructed wetlands. *Sci. Total Environ.* **2018**, 630, 648-657. DOI: <https://doi.org/10.1016/j.scitotenv.2018.02.242>
19. Nivala, J.; Kahl, S.; Boog, J.; Afferden, M.; Reemtsma, T.; Müller, R.A. Dynamics of emerging organic contaminant removal in conventional and intensified subsurface flow treatment wetlands. *Sci. Total Environ.* **2019**, 649, 1144-1156. DOI: <https://doi.org/10.1016/j.scitotenv.2018.08.339>
20. Wang, Y.; Yin, T.; Kelly, B.C.; Gin, K.Y-H. Bioaccumulation behaviour of pharmaceuticals and personal care products in a constructed wetland. *Chemosphere* **2019**, 222, 275-285. DOI: <https://doi.org/10.1016/j.chemosphere.2019.01.116>
21. Matamoros, V.; Arias, C.; Brix, H.; Bayona, J.M. Removal of pharmaceuticals and personal care products (PPCPs) from urban wastewater in a pilot vertical flow constructed wetland and a sand filter. *Environ. Sci. Technol.* **2007**, 41 (23), 8171-8177. DOI: <https://doi.org/10.1021/es071594+>
22. Ávila, C.; Nivala, J.; Olsson, L.; Kassa, K.; Headley, T.; Mueller, R.A.; Bayona, J.M.; García, J. Emerging organic contaminants in vertical subsurface flow constructed wetlands: Influence of media size, loading frequency and use of active aeration. *Sci. Total Environ.* **2014**, 494-495, 211-217. DOI: <https://doi.org/10.1016/j.scitotenv.2014.06.128>
23. Francini, A.; Mariotti, L.; Gregorio, S.D.; Sebastiani, L.; Andreucci, A. Removal of micro-pollutants from urban wastewater by constructed wetlands with *Phragmites australis* and *Salix matsudana*. *Environ. Sci. Pollut. Res.* **2018**, 25 (36), 36474-36484. DOI: <https://doi.org/10.1007/s11356-018-3582-x>
24. Sgroi, M.; Pelissari, C.; Roccaro, P.; Sezerino, P.H.; García, J.; Vagliasindi, F.G.A.; Ávila, C. Removal of organic carbon, nitrogen, emerging contaminants and fluorescing organic matter in different

- constructed wetland configurations. *Chem. Eng. J.* **2018**, 332, 619-627. DOI: <https://doi.org/10.1016/j.cej.2017.09.122>
25. Xie, H.; Yang, Y.; Liu, J.; Kang, Y.; Zhang, J.; Hu, Z.; Liang, S. Enhanced triclosan and nutrient removal performance in vertical up-flow constructed wetlands with manganese oxides. *Water Res.* **2018**, 143, 457-466. DOI: <https://doi.org/10.1016/j.watres.2018.05.061>
  26. Button, M.; Cosway, K.; Sui, J.; Weber, K. Impacts and fate of triclosan and sulfamethoxazole in intensified re-circulating vertical flow constructed wetlands. *Sci. Total Environ.* **2019**, 649, 1017-1028. DOI: <https://doi.org/10.1016/j.scitotenv.2018.08.395>
  27. Park, N.; Vanderford, B.J.; Snyder, S.A.; Sarp, S.; Kim, S.D.; Cho, J. Effective controls of micro-pollutants included in wastewater effluent using constructed wetlands under anoxic condition. *Ecol. Eng.* **2009**, 35 (3), 418-423. DOI: <https://doi.org/10.1016/j.ecoleng.2008.10.004>
  28. Ávila, C.; Pedescoll, A.; Matamoros, V.; Bayona, J.M.; García, J. Capacity of a horizontal subsurface flow constructed wetland system for the removal of emerging pollutants: an injection experiment. *Chemosphere* **2010**, 81 (9), 1137-1142. DOI: <https://doi.org/10.1016/j.chemosphere.2010.08.006>
  29. Hijosa-Valsero, M.; Matamoros, V.; Martín-Villacorta, J.; Becares, E.; Bayona, J.M. Assessment of full-scale natural systems for the removal of PPCPs from wastewater in small communities. *Water Res.* **2010**, 44 (5), 1429-1439. DOI: <https://doi.org/10.1016/j.watres.2009.10.032>
  30. Hijosa-Valsero, M.; Matamoros, V.; Pedescoll, A.; Martín-Villacorta, J.; Bécares, E.; García, J.; Bayona, J.M. Evaluation of primary treatment and loading regimes in the removal of pharmaceuticals and personal care products from urban wastewaters by subsurface-flow constructed wetlands. *Int. J. Environ. An. Ch.* **2011**, 91 (7-8), 632-653. DOI: <https://doi.org/10.1080/03067319.2010.526208>
  31. Matamoros, V.; Salvadó, V. Evaluation of the seasonal performance of a water reclamation pond-constructed wetland system for removing emerging contaminants. *Chemosphere* **2012**, 86 (2), 111-117. DOI: <https://doi.org/10.1016/j.chemosphere.2011.09.020>
  32. Ávila, C.; Reyes, C.; Bayona, J.M.; García, J. Emerging organic contaminant removal depending on primary treatment and operational strategy in horizontal subsurface flow constructed wetlands: influence of redox. *Water Res.* **2013**, 47 (1), 315-325. DOI: <https://doi.org/10.1016/j.watres.2012.10.005>
  33. Zhu, S.; Chen, H. The fate and risk of selected pharmaceutical and personal care products in wastewater treatment plants and a pilot-scale multistage constructed wetland system. *Environ. Sci. Pollut. Res.* **2014**, 21 (2), 1466-1479. DOI: <https://doi.org/10.1007/s11356-013-2025-y>
  34. Ávila, C.; Matamoros, V.; Reyes-Contreras, C.; Piña, B.; Casado, M.; Mita, L.; Rivetti, C.; Barata, C.; García, J.; Bayona, J.M. Attenuation of emerging contaminants in a hybrid constructed wetland system under different hydraulic loading rates and their associated toxicological effects in wastewater. *Sci. Total Environ.* **2014**, 470-471, 1272-1280. DOI: <https://doi.org/10.1016/j.scitotenv.2013.10.065>
  35. Ávila, C.; Bayona, J.M.; Martín, I.; Salas, J.J.; García, J. Emerging organic contaminant removal in a full-scale hybrid constructed wetland system for wastewater treatment and reuse. *Ecol. Eng.* **2015**, 80, 108-116. DOI: <https://doi.org/10.1016/j.ecoleng.2014.07.056>
  36. Matamoros, V.; Rodríguez, Y.; Albaigés, J. A comparative assessment of intensive and extensive wastewater treatment technologies for removing emerging contaminants in small communities. *Water Res.* **2016**, 88, 777-785. DOI: <https://doi.org/10.1016/j.watres.2015.10.058>

37. Dai, Y.; Tao, R.; Tai, Y.; Tam, N.F.; Dan, A.; Yang, Y. Application of a full-scale newly developed stacked constructed wetland and an assembled bio-filter for reducing phenolic endocrine disrupting chemicals from secondary effluent. *Ecol. Eng.* **2017**, *99*, 496-503. DOI: <https://doi.org/10.1016/j.ecoleng.2016.11.007>
38. Vystavna, Y.; Frkova, Z.; Marchand, L.; Vergeles, Y.; Stolberg, F. Removal efficiency of pharmaceuticals in a full scale constructed wetland in East Ukraine. *Ecol. Eng.* **2017**, *108* (Part A), 50-58. DOI: <https://doi.org/10.1016/j.ecoleng.2017.08.009>
39. Chen, J.; Liu, Y-S.; Deng, W-J.; Ying, G-G. Removal of steroid hormones and biocides from rural wastewater by an integrated constructed wetland. *Sci. Total Environ.* **2019**, *660*, 358-365. DOI: <https://doi.org/10.1016/j.scitotenv.2019.01.049>
40. Matamoros, V.; Nguyen, L.X.; Arias, C.A.; Salvadó, V.; Brix, H. Evaluation of aquatic plants for removing polar microcontaminants: a microcosm experiment. *Chemosphere* **2012**, *88* (10), 1257-1264. DOI: <https://doi.org/10.1016/j.chemosphere.2012.04.004>
41. Burken, J.G.; Schnoor, J.L. Predictive relationships for uptake of organic contaminants by hybrid polar trees. *Environ. Sci. Technol.* **1998**, *32* (21), 3379-3385. DOI: <https://doi.org/10.1021/es9706817>
42. Reinhold, D.; Vishwanathan, S.; Park, J.J.; Oh, D.; Saunders, F.M. Assessment of plant-driven removal of emerging organic pollutants by duckweed. *Chemosphere* **2010**, *80* (7), 687-692. DOI: <https://doi.org/10.1016/j.chemosphere.2010.05.045>
43. Briggs, G.G.; Bromilow, R.H.; Evans, A.A. Relationships between lipophilicity and root uptake and translocation of non-ionized chemicals by barley. *Pestic. Sci.* **1983**, *13*, 495-500. DOI: <https://doi.org/10.1002/ps.2780130506>
44. Alvarez, D.A.; Petty, J.D.; Huckins, J.N.; Jones-Lepp, T.L.; Getting, D.T.; Goddard, J.P.; Manahan, S.E. Development of a passive, in situ, integrative sampler for hydrophilic organic contaminants in aquatic environments. *Environ. Toxicol. Chem.* **2004**, *23* (7), 1640-1648. DOI: <https://doi.org/10.1897/03-603>
45. Le-Minh, N.; Khan, S.J.; Drewes, J.E.; Stuetz, R.M. Fate of antibiotics during municipal water recycling treatment processes. *Water Res.* **2010**, *44* (15), 4295-4323. DOI: <https://doi.org/10.1016/j.watres.2010.06.020>
46. Dan, A.; Yang, Y.; Dai, Y-n.; Chen, C-x.; Wang, S-y.; Tao, R. Removal and factors influencing removal of sulfonamides and trimethoprim from domestic sewage in constructed wetlands. *Bioresour. Technol.* **2013**, *146*, 363-370. DOI: <https://doi.org/10.1016/j.biortech.2013.07.050>
47. Dietz, A.C.; Schnoor, J.L. Advances in phytoremediation. *Environ. Health Perspect.* **2001**, *109*, 163-168. DOI: <https://doi.org/10.1289/ehp.01109s1163>
48. Pilon-Smits, E. Phytoremediation. *Ann. Rev. Plant Biol.* **2005**, *56*, 15-39. DOI: [doi:10.1146/annurev.arplant.56.032604.144214](https://doi.org/10.1146/annurev.arplant.56.032604.144214)
49. Lee, S.; Kang, S.; Lim, J.; Huh, Y.J.; Kim, K.; Cho, J. Evaluating controllability of pharmaceuticals and metabolites in biologically engineered processes, using corresponding octanol-water distribution coefficient. *Ecol. Eng.* **2011**, *37*, 1595-1600. DOI: <https://doi.org/10.1016/j.ecoleng.2011.04.007>
50. Zhang, D.Q.; Gersberg, R.M.; Zhu, J.; Hua, T.; Jinadasa, K.B.S.N.; Tan, S.K. Batch versus continuous feeding strategies for pharmaceutical removal by subsurface flow constructed wetland. *Environ. Pollut.* **2012**, *167*, 124-131. DOI: <https://doi.org/10.1016/j.envpol.2012.04.004>

51. Piwoni, M.D.; Keeley, J.W. Ground Water Issue. *Basic Concepts of Contaminant Sorption at Hazardous Waste Sites*. U.S. Environmental Protection Agency, Washington, DC, EPA/540/4-90/053 (NTIS 91-191007), 1990. URLs/Downloads: [Ground Water Issue. BASIC CONCEPTS OF CONTAMINANT SORPTION AT HAZARDOUS WASTE SITES](#) (Accessed: 28/01/19).
52. Yan, Q.; Feng, G.; Gao, X.; Sun, C.; Guo, J-S.; Zhu, Z. Removal of pharmaceutically active compounds (PhACs) and toxicological response of *Cyperus alternifolius* exposed to PhACs in microcosm constructed wetlands. *J. Hazard. Mater.* **2016**, 301, 566-575. DOI: <https://doi.org/10.1016/j.jhazmat.2015.08.057>
53. Jekel, M.; Dott, W.; Bergmann, A.; Dunnbier, U.; Gnirss, R.; Haist-Gulde, B.; Hamscher, G.; Letzel, M.; Licha, T.; Lyko, S.; Miehe, U.; Sacher, F.; Scheurer, M.; Schmidt, C.K.; Reemtsma, T.; Ruhl, A.S. Selection of organic process and source indicator substances for the anthropogenically influenced water cycle. *Chemosphere* **2015**, 125, 155-167. DOI: <https://doi.org/10.1016/j.chemosphere.2014.12.025>
54. Burke, V.; Greskowiak, J.; Grunenbaum, N.; Massmann, G. Redox and temperature dependent attenuation of twenty organic micropollutants - a systematic column study. *Water Environ. Res.* **2017**, 89 (2), 155-167. DOI: <https://doi.org/10.2175/106143016X14609975746000>
55. Castronovo, S.; Wick, A.; Scheurer, M.; Nödler, K.; Schulz, M.; Ternes, T.A. Biodegradation of the artificial sweetener acesulfame in biological wastewater treatment and sandfilters. *Water Res.* **2017**, 110, 342-353. DOI: <https://doi.org/10.1016/j.watres.2016.11.041>
56. Kahl, S.; Kleinstuber, S.; Nivala, J.; van Afferden, M.; Müller, R.A.; Reemtsma, T. Emerging biodegradation of the previously persistent artificial sweetener acesulfame in biological wastewater treatment. *Environ. Sci. Technol.* **2018**, 52 (5), 2717-2725. DOI: <https://doi.org/10.1021/acs.est.7b05619>
57. Nuel, M.; Laurent, J.; Bois, P.; Heintz, D.; Wanko, A. Seasonal and ageing effect on the behaviour of 86 drugs in a full-scale surface treatment wetland: Removal efficiencies and distribution in plants and sediments. *Sci. Total Environ.* **2018**, 615, 1099-1109. DOI: <https://doi.org/10.1016/j.scitotenv.2017.10.061>
58. Meyer, J.; Bester, K. Organophosphate flame retardants and plasticisers in wastewater treatment plants. *J. Environ. Monit.* **2004**, 6, 599-605. DOI: <https://doi.org/10.1039/B403206C>
59. Beel, R.; Eversloh, C.L.; Ternes, T.A. Biotransformation of the UV-Filter Sulisobenzzone: Challenges for the Identification of Transformation Products. *Environ. Sci. Technol.* **2013**, 47 (13), 6819-6828. DOI: <https://doi.org/10.1021/es400451w>
